# Supplementary material for: An Epigenetic Signature in Peripheral Blood Predicts Active Ovarian Cancer
Source: PubMed Central journal article supplement (PMC2793425; doi:10.1371/journal.pone.0008274), 2009-12-18

**a****Before quantile normalisation**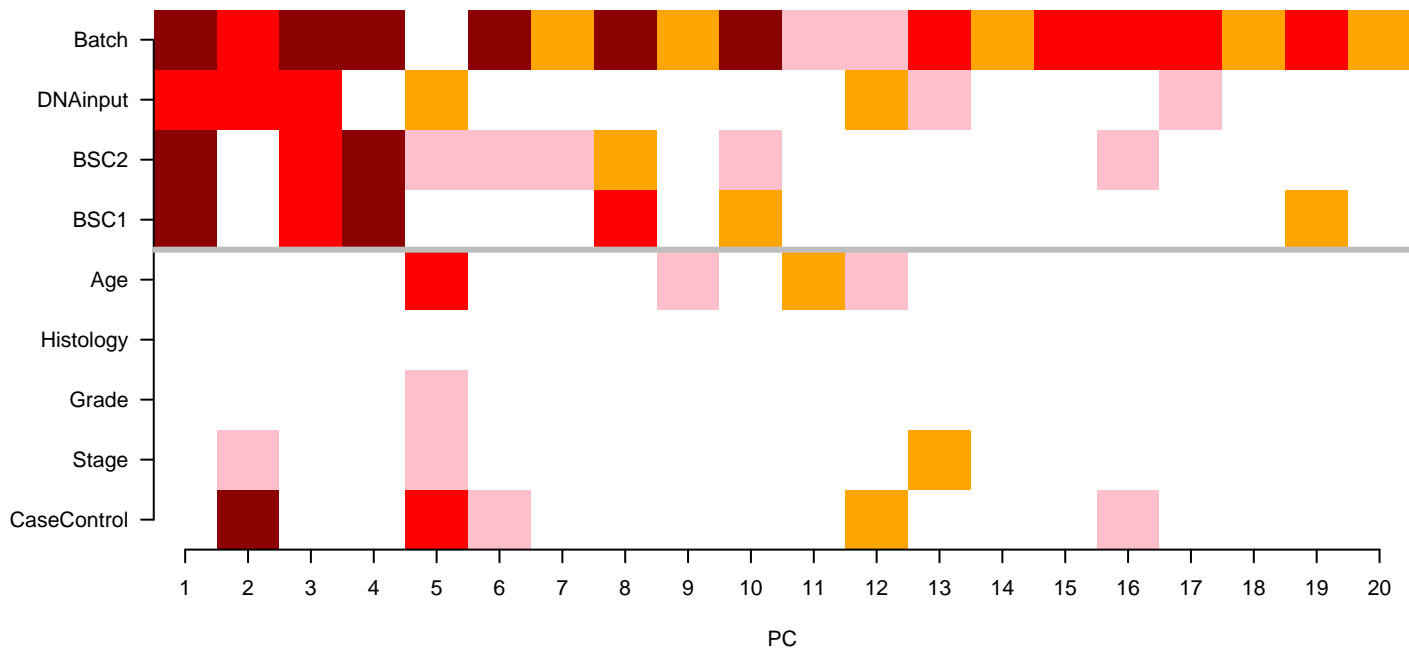**b****After quantile normalisation**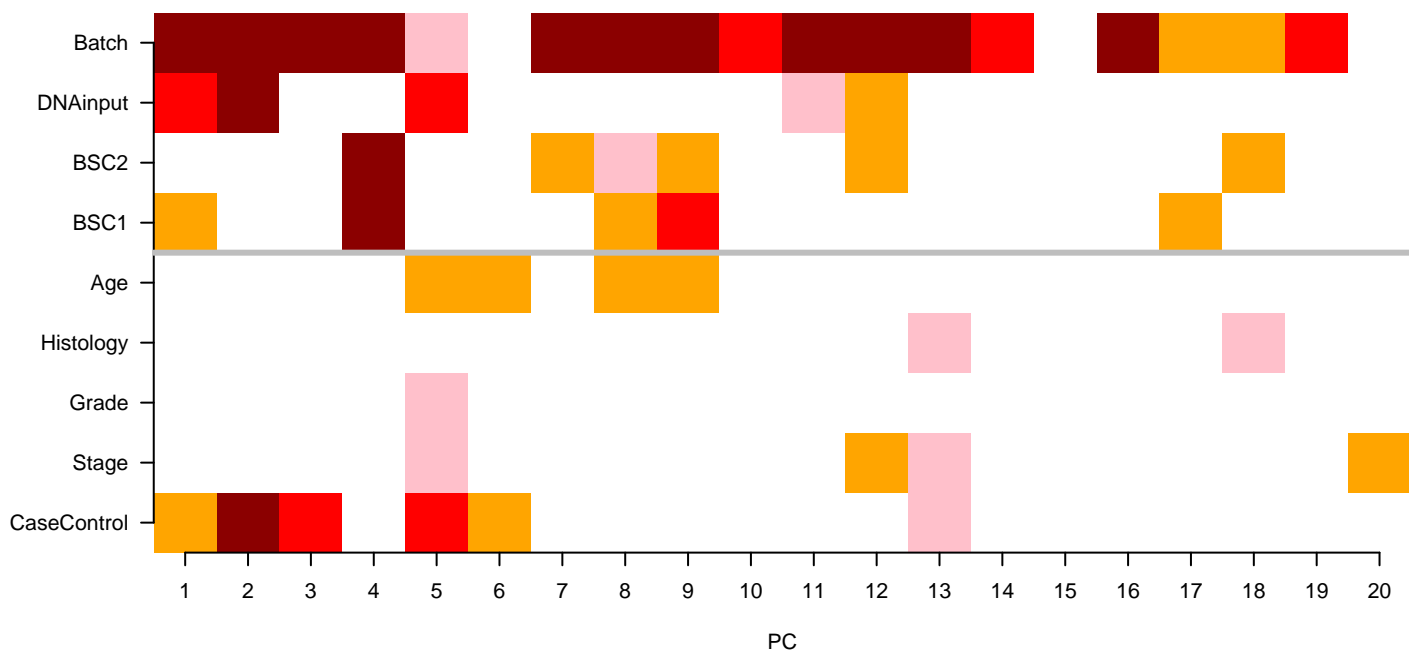**c****After adjustment for BSC, DNA input and Batch effects**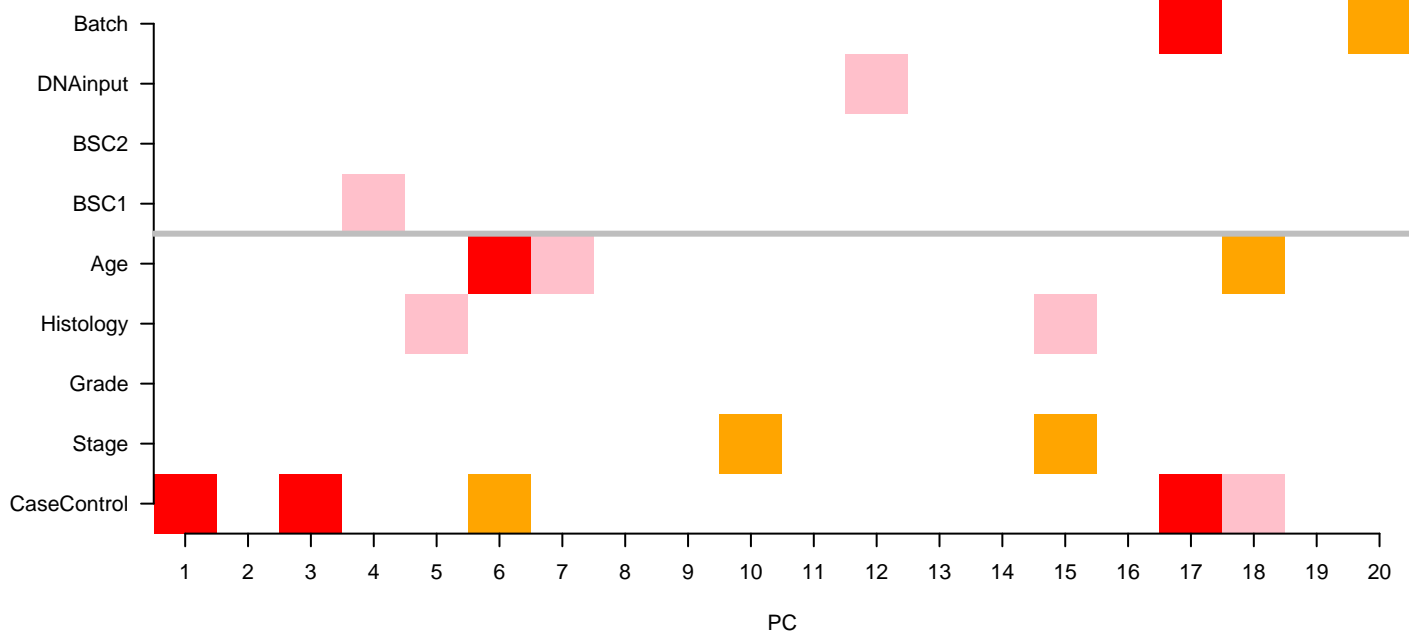

Supplement: pone.0008274.s001.pdf [file pone.0008274.s001.pdf]
