# Supplementary material for: An Epigenetic Signature in Peripheral Blood Predicts Active Ovarian Cancer
Source: PubMed Central journal article supplement (PMC2793425; doi:10.1371/journal.pone.0008274), 2009-12-18

## Granulocyte markers

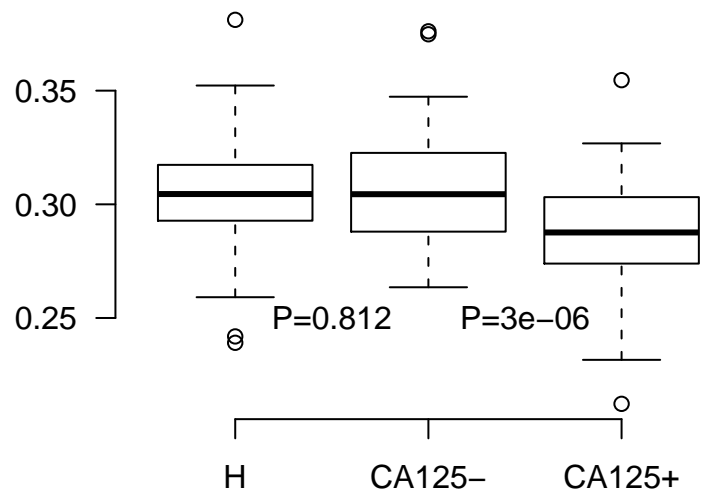

## Lymphocyte markers

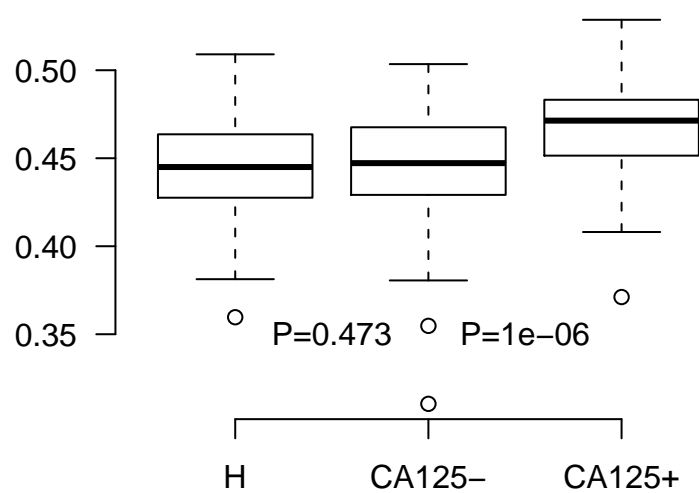

Supplement: pone.0008274.s004.pdf [file pone.0008274.s004.pdf]
