# Supplementary material for: An Epigenetic Signature in Peripheral Blood Predicts Active Ovarian Cancer
Source: PubMed Central journal article supplement (PMC2793425; doi:10.1371/journal.pone.0008274), 2009-12-18
Supplement: pone.0008274.s007.pdf [file pone.0008274.s007.pdf]

Suppl Table 1

| Characteristics               | Controls |     | Pre-treatment Cases versus controls |     |            |               | Post-treatment Cases versus controls |     |            |               |        |
|-------------------------------|----------|-----|-------------------------------------|-----|------------|---------------|--------------------------------------|-----|------------|---------------|--------|
|                               | n        | %   | n                                   | %   | OR (95%CI) | p-value       | n                                    | %   | OR (95%CI) | p-value       |        |
| Age                           | <65      | 149 | 54                                  | 55  | 42         | 1.6 (1.1-2.5) | 0.02                                 | 68  | 50         |               |        |
|                               | >65      | 125 | 46                                  | 76  | 58         |               |                                      | 67  | 50         | 1.2 (0.8-1.8) | 0.44   |
| Ethnicity                     | White    | 247 | 90                                  | 105 | 80         |               |                                      | 116 | 86         |               |        |
|                               | Other    | 6   | 2                                   | 4   | 3          | 0.4-5.7       | 0.49                                 | 3   | 2          | 1.1 (0.3-4.3) | 0.93   |
|                               | Unknown  | 21  | 8                                   | 22  | 17         |               |                                      | 16  | 12         |               |        |
| Age at menarche*              | <13      | 156 | 57                                  | 36  | 27         |               |                                      | 67  | 50         |               |        |
|                               | >13      | 97  | 35                                  | 36  | 27         | 1.6 (0.9-2.7) | 0.1                                  | 29  | 21         | 0.7 (0.4-1.2) | 0.16   |
|                               | Unknown  | 21  | 8                                   | 59  | 45         |               |                                      | 39  | 29         |               |        |
| Ever pregnant                 | No       | 5   | 2                                   | 18  | 14         |               |                                      | 18  | 13         |               |        |
|                               | Yes      | 230 | 84                                  | 53  | 40         | 0.1 (0.0-0.2) | <0.001                               | 79  | 59         | 0.1 (0.0-0.3) | <0.001 |
|                               | Unknown  | 39  | 14                                  | 60  | 46         |               |                                      | 38  | 28         |               |        |
| Ever Oral Contraceptives used | No       | 24  | 9                                   | 37  | 28         |               |                                      | 60  | 44         |               |        |
|                               | Yes      | 151 | 55                                  | 34  | 26         | 0.1 (0.1-0.3) | <0.001                               | 36  | 27         | 0.1 (0.1-0.2) | <0.001 |
|                               | Unknown  | 99  | 36                                  | 60  | 46         |               |                                      | 39  | 29         |               |        |
| Ever Fertility Problems       | No       | 54  | 20                                  | 58  | 44         |               |                                      | 79  | 79         |               |        |
|                               | Yes      | 11  | 4                                   | 7   | 5          | 0.6 (0.2-1.6) | 0.31                                 | 16  | 16         | 1.0 (0.4-2.3) | 0.98   |
|                               | Unknown  | 209 | 76                                  | 66  | 50         |               |                                      | 40  | 40         |               |        |

Suppl Table 1

| TUMOR CHARACTERISTICS            |            | Pre-treatment  |    | Post-treatment |    | P- value |
|----------------------------------|------------|----------------|----|----------------|----|----------|
|                                  |            | <i>n</i>       | %* | <i>n</i>       | %* |          |
| Histology                        | Serous     | 72             | 55 | 80             | 59 | n.s.     |
|                                  | Mucinous   | 15             | 11 | 15             | 11 |          |
|                                  | Endometric | 18             | 14 | 19             | 14 |          |
|                                  | Clear cell | 14             | 11 | 14             | 10 |          |
|                                  | Other      | 12             | 9  | 7              | 5  |          |
| Stage                            | I          | 49             | 37 | 44             | 33 | n.s.     |
|                                  | II         | 13             | 10 | 20             | 15 |          |
|                                  | III        | 58             | 44 | 62             | 46 |          |
|                                  | IV         | 11             | 8  | 9              | 7  |          |
| Grading                          | 1          | 17             | 13 | 10             | 7  | n.s.     |
|                                  | 2          | 32             | 24 | 32             | 24 |          |
|                                  | 3          | 70             | 53 | 71             | 53 |          |
|                                  | Unknown    | 12             | 9  | 22             | 16 |          |
| Age at recruitment (Mean +/- SD) |            | 67.2 (+/- 9.1) |    | 65.6 (+/- 9.6) |    | n.s.     |
| Age at diagnosis (Mean +/- SD)   |            | 67.2 (+/- 9.1) |    | 63.2 (+/- 9.1) |    | 0.001    |
