# Supplementary material for: An Epigenetic Signature in Peripheral Blood Predicts Active Ovarian Cancer
Source: PubMed Central journal article supplement (PMC2793425; doi:10.1371/journal.pone.0008274), 2009-12-18
Supplement: pone.0008274.s008.pdf [file pone.0008274.s008.pdf]

SupplTable2.txt

| IlmnID      | Symbol  | Entrez_ID | CPG_ISLAND | OR (95% CI)     | P-val | Q-val | Correlation with Age |
|-------------|---------|-----------|------------|-----------------|-------|-------|----------------------|
| cg080444694 | BRD4    | 23476     | TRUE       | 0.26(0.17-0.39) | 3E-10 | 1E-06 | 0                    |
| cg09134726  | PRTN3   | 5657      | FALSE      | 0.26(0.17-0.4)  | 4E-10 | 1E-06 | 0                    |
| cg20070090  | S100A8  | 6279      | FALSE      | 0.27(0.18-0.41) | 5E-10 | 1E-06 | 0                    |
| cg00974864  | FCGR3B  | 2215      | FALSE      | 0.24(0.15-0.38) | 5E-10 | 1E-06 | 0                    |
| cg01980222  | TREM2   | 54209     | FALSE      | 0.27(0.18-0.41) | 6E-10 | 1E-06 | -1                   |
| cg20748065  | POR     | 5447      | TRUE       | 0.23(0.14-0.37) | 6E-10 | 1E-06 | 0                    |
| cg24211388  | AIF1    | 199       | FALSE      | 0.27(0.18-0.42) | 7E-10 | 1E-06 | 0                    |
| cg02679745  | FUT7    | 2529      | FALSE      | 0.27(0.18-0.41) | 7E-10 | 1E-06 | 0                    |
| cg27461196  | FXVD1   | 5348      | FALSE      | 0.26(0.17-0.4)  | 7E-10 | 1E-06 | 0                    |
| cg27606341  | FYB     | 2533      | FALSE      | 0.28(0.19-0.42) | 9E-10 | 1E-06 | 0                    |
| cg18638581  | HK2     | 3099      | FALSE      | 0.24(0.15-0.38) | 1E-09 | 1E-06 | 0                    |
| cg20792833  | PTPRCAP | 5790      | FALSE      | 3.26(2.23-4.76) | 1E-09 | 1E-06 | 0                    |
| cg25832796  | AP1G2   | 8906      | FALSE      | 0.29(0.19-0.43) | 1E-09 | 1E-06 | -1                   |
| cg2477950   | CTSG    | 1511      | FALSE      | 0.27(0.18-0.42) | 1E-09 | 1E-06 | -1                   |
| cg25634666  | FOLR3   | 2352      | FALSE      | 0.27(0.17-0.41) | 1E-09 | 1E-06 | 0                    |
| cg03801286  | KCNE1   | 3753      | FALSE      | 0.28(0.18-0.42) | 1E-09 | 1E-06 | 0                    |
| cg24898863  | S100A8  | 6279      | FALSE      | 0.28(0.19-0.43) | 1E-09 | 1E-06 | 0                    |
| cg14654385  | URP2    | 83706     | TRUE       | 0.28(0.19-0.43) | 1E-09 | 1E-06 | 0                    |
| cg02240622  | PLCB2   | 5330      | FALSE      | 0.26(0.17-0.41) | 1E-09 | 1E-06 | 0                    |
| cg18390025  | ELOVL3  | 83401     | TRUE       | 0.27(0.18-0.42) | 1E-09 | 1E-06 | 0                    |
| cg18920397  | LY9     | 4063      | FALSE      | 3.73(2.43-5.73) | 2E-09 | 1E-06 | 1                    |
| cg09964921  | KCNE1   | 3753      | FALSE      | 0.29(0.2-0.44)  | 2E-09 | 1E-06 | 0                    |
| cg10287137  | P2RY2   | 5029      | TRUE       | 0.3(0.2-0.45)   | 2E-09 | 1E-06 | 0                    |
| cg15464148  | GPR92   | 57121     | FALSE      | 3.53(2.33-5.36) | 2E-09 | 1E-06 | 0                    |
| cg11283860  | SLC45A1 | 50651     | TRUE       | 0.27(0.18-0.42) | 2E-09 | 1E-06 | 0                    |
| cg17078393  | LCK     | 3932      | TRUE       | 3.32(2.23-4.94) | 2E-09 | 2E-06 | 0                    |

SuppTable2.txt

|             |          |        |       |                 |       |       |    |
|-------------|----------|--------|-------|-----------------|-------|-------|----|
| cg093036642 | NFE2     | 4778   | FALSE | 0.28(0.18-0.43) | 3E-09 | 2E-06 | 0  |
| cg03330678  | SEPT9    | 10801  | TRUE  | 0.3(0.2-0.45)   | 3E-09 | 2E-06 | 0  |
| cg12125117  | GPR97    | 222487 | FALSE | 0.28(0.19-0.43) | 3E-09 | 2E-06 | -1 |
| cg18084554  | ARID3A   | 1820   | FALSE | 0.29(0.19-0.44) | 3E-09 | 2E-06 | 0  |
| cg25600606  | HIPK3    | 10114  | FALSE | 0.32(0.22-0.47) | 4E-09 | 2E-06 | 0  |
| cg07376232  | AMICA1   | 120425 | FALSE | 0.3(0.2-0.45)   | 4E-09 | 2E-06 | 0  |
| cg00645579  | IRF7     | 3665   | TRUE  | 0.3(0.2-0.45)   | 4E-09 | 2E-06 | 0  |
| cg02863947  | NR112    | 8856   | FALSE | 0.31(0.21-0.46) | 4E-09 | 2E-06 | 0  |
| cg11822932  | LMO2     | 4005   | FALSE | 0.3(0.2-0.45)   | 4E-09 | 2E-06 | 0  |
| cg07285167  | CSF3R    | 1441   | FALSE | 0.29(0.2-0.44)  | 4E-09 | 2E-06 | -1 |
| cg04353769  | MS4A6A   | 64231  | FALSE | 0.29(0.19-0.44) | 5E-09 | 2E-06 | 0  |
| cg22820108  | NCOR2    | 9612   | TRUE  | 0.28(0.18-0.43) | 5E-09 | 2E-06 | 0  |
| cg23090046  | KNS2     | 3831   | TRUE  | 0.32(0.21-0.47) | 5E-09 | 2E-06 | 0  |
| cg10161121  | FASLG    | 356    | FALSE | 3.11(2.12-4.56) | 5E-09 | 2E-06 | 0  |
| cg27485921  | ATP6V1E2 | 90423  | FALSE | 0.29(0.19-0.45) | 6E-09 | 2E-06 | 0  |
| cg15910079  | RNASE3   | 6037   | FALSE | 0.31(0.21-0.46) | 6E-09 | 2E-06 | -1 |
| cg12640109  | ASRGL1   | 80150  | TRUE  | 0.34(0.24-0.49) | 6E-09 | 2E-06 | 0  |
| cg24427660  | PNPLA2   | 57104  | TRUE  | 0.29(0.19-0.45) | 7E-09 | 2E-06 | -1 |
| cg08368934  | GPR97    | 222487 | FALSE | 0.3(0.2-0.45)   | 7E-09 | 2E-06 | 0  |
| cg24949488  | DNTT     | 1791   | TRUE  | 3.25(2.18-4.86) | 8E-09 | 3E-06 | 1  |
| cg17823175  | AZU1     | 566    | TRUE  | 0.31(0.21-0.47) | 8E-09 | 3E-06 | 0  |
| cg21991396  | CIAS1    | 114548 | FALSE | 0.33(0.22-0.48) | 8E-09 | 3E-06 | 0  |
| cg11024597  | ECRG4    | 84417  | FALSE | 0.31(0.21-0.47) | 8E-09 | 3E-06 | 0  |
| cg15784615  | LTBR     | 4055   | FALSE | 0.32(0.21-0.47) | 8E-09 | 3E-06 | -1 |
| cg17813891  | EVL      | 51466  | FALSE | 3.25(2.17-4.86) | 9E-09 | 3E-06 | 0  |
| cg08458487  | SFTPD    | 6441   | FALSE | 0.33(0.22-0.48) | 9E-09 | 3E-06 | 0  |
| cg08539991  | ZBTB32   | 27033  | FALSE | 3.17(2.13-4.71) | 9E-09 | 3E-06 | 0  |

## SupplTable2.txt

|            |           |        |       |                 |       |       |    |
|------------|-----------|--------|-------|-----------------|-------|-------|----|
| cg22467534 | UNC13D    | 201294 | TRUE  | 0.32(0.21-0.47) | 1E-08 | 3E-06 | 0  |
| cg02374486 | PRF1      | 5551   | FALSE | 3.04(2.08-4.46) | 1E-08 | 3E-06 | 0  |
| cg07730301 | ALDH3B1   | 221    | FALSE | 0.28(0.18-0.43) | 1E-08 | 3E-06 | 0  |
| cg16361890 | LTC4S     | 4056   | FALSE | 0.31(0.21-0.47) | 1E-08 | 3E-06 | 0  |
| cg13765961 | MS4A1     | 931    | FALSE | 3.03(2.07-4.44) | 1E-08 | 3E-06 | 0  |
| cg14511156 | OSCAR     | 126014 | FALSE | 0.31(0.21-0.47) | 1E-08 | 4E-06 | 0  |
| cg00071250 | FASLG     | 356    | FALSE | 2.97(2.03-4.34) | 1E-08 | 4E-06 | 0  |
| cg06812844 | TRPM2     | 7226   | FALSE | 0.32(0.21-0.47) | 1E-08 | 4E-06 | 0  |
| cg17356733 | IFNGR2    | 3460   | TRUE  | 0.32(0.22-0.48) | 2E-08 | 4E-06 | 0  |
| cg25050026 | MFS1      | 64747  | TRUE  | 0.33(0.22-0.48) | 2E-08 | 4E-06 | 0  |
| cg21126943 | CEACAM6   | 4680   | FALSE | 0.34(0.23-0.5)  | 2E-08 | 4E-06 | 0  |
| cg19906550 | SLC22A18  | 5002   | FALSE | 0.31(0.21-0.47) | 2E-08 | 4E-06 | 0  |
| cg08176694 | PITPNM2   | 57605  | TRUE  | 0.32(0.22-0.48) | 2E-08 | 4E-06 | 0  |
| cg05546038 | NOL3      | 8996   | FALSE | 0.34(0.23-0.5)  | 2E-08 | 4E-06 | 0  |
| cg25587233 | PPP2R4    | 5524   | FALSE | 0.33(0.22-0.48) | 2E-08 | 4E-06 | 0  |
| cg17709873 | MTA       | 4049   | FALSE | 3.26(2.16-4.94) | 2E-08 | 4E-06 | 0  |
| cg00333528 | GABRR1    | 2569   | FALSE | 0.33(0.22-0.49) | 2E-08 | 4E-06 | 0  |
| cg22242539 | SERPINF1  | 5176   | TRUE  | 0.33(0.23-0.49) | 2E-08 | 4E-06 | 0  |
| cg05564251 | SP140     | 11262  | FALSE | 3.12(2.09-4.66) | 2E-08 | 4E-06 | 0  |
| cg09358725 | LMO2      | 4005   | FALSE | 0.31(0.21-0.47) | 2E-08 | 4E-06 | 0  |
| cg04988978 | MPO       | 4353   | FALSE | 0.33(0.22-0.49) | 2E-08 | 4E-06 | -1 |
| cg13053608 | LGP1      | 84514  | FALSE | 0.34(0.23-0.49) | 2E-08 | 5E-06 | -1 |
| cg06759890 | LHFPL2    | 10184  | FALSE | 0.34(0.24-0.5)  | 2E-08 | 5E-06 | -1 |
| cg26701826 | MGC26963  | 166929 | FALSE | 0.32(0.21-0.48) | 2E-08 | 5E-06 | 0  |
| cg02266731 | CPM       | 1368   | FALSE | 0.33(0.23-0.49) | 2E-08 | 5E-06 | 0  |
| cg09868035 | C20orf135 | 140701 | FALSE | 0.32(0.21-0.48) | 2E-08 | 5E-06 | 0  |
| cg25839227 | ABI3      | 51225  | FALSE | 3.1(2.08-4.62)  | 3E-08 | 5E-06 | 0  |

SuppTable2.txt

|            |           |        |       |                 |       |       |    |
|------------|-----------|--------|-------|-----------------|-------|-------|----|
| cg18463686 | CLEC5A    | 23601  | FALSE | 0.34(0.23-0.5)  | 3E-08 | 5E-06 | 0  |
| cg01402255 | GATAD2B   | 57459  | FALSE | 0.34(0.23-0.49) | 3E-08 | 5E-06 | -1 |
| cg20320468 | LAIR1     | 3903   | FALSE | 0.35(0.24-0.51) | 3E-08 | 5E-06 | 0  |
| cg02600394 | TXK       | 7294   | FALSE | 2.95(2.01-4.31) | 3E-08 | 5E-06 | 1  |
| cg10257049 | C5orf4    | 10826  | FALSE | 0.32(0.21-0.48) | 3E-08 | 6E-06 | 0  |
| cg09914304 | PRF1      | 5551   | FALSE | 3(2.03-4.43)    | 3E-08 | 6E-06 | 1  |
| cg13765621 | CD1D      | 912    | FALSE | 0.35(0.24-0.51) | 3E-08 | 6E-06 | -1 |
| cg01441777 | CSNK1E    | 1454   | TRUE  | 0.31(0.21-0.47) | 3E-08 | 6E-06 | -1 |
| cg17173423 | MS4A3     | 932    | FALSE | 0.32(0.21-0.48) | 3E-08 | 6E-06 | 0  |
| cg00134539 | UBASH3A   | 53347  | FALSE | 2.6(1.85-3.65)  | 3E-08 | 6E-06 | 0  |
| cg26154999 | FLJ22746  | 79843  | TRUE  | 0.3(0.19-0.46)  | 3E-08 | 6E-06 | -1 |
| cg25087423 | BLR1      | 643    | TRUE  | 3.07(2.06-4.59) | 3E-08 | 6E-06 | 1  |
| cg16967583 | AGXT      | 189    | FALSE | 0.35(0.24-0.51) | 3E-08 | 6E-06 | 0  |
| cg05501357 | HIPK3     | 10114  | FALSE | 0.31(0.2-0.47)  | 3E-08 | 6E-06 | -1 |
| cg21969640 | GPR84     | 53831  | FALSE | 0.33(0.22-0.49) | 3E-08 | 6E-06 | -1 |
| cg15374234 | CD300LF   | 146722 | FALSE | 0.36(0.25-0.52) | 4E-08 | 6E-06 | 0  |
| cg17496921 | TSPAN16   | 26526  | FALSE | 0.32(0.21-0.48) | 4E-08 | 6E-06 | -1 |
| cg01774645 | ARHGAP30  | 257106 | FALSE | 2.86(1.96-4.15) | 4E-08 | 6E-06 | 0  |
| cg11939496 | CD244     | 51744  | FALSE | 0.37(0.26-0.53) | 4E-08 | 6E-06 | 0  |
| cg04759756 | SLA2      | 84174  | FALSE | 2.88(1.97-4.22) | 4E-08 | 6E-06 | 0  |
| cg21932814 | CSTA      | 1475   | FALSE | 0.36(0.25-0.52) | 4E-08 | 6E-06 | 0  |
| cg04756629 | LOC400696 | 400696 | FALSE | 2.79(1.93-4.04) | 4E-08 | 6E-06 | 0  |
| cg01623438 | CTSZ      | 1522   | FALSE | 0.33(0.22-0.49) | 4E-08 | 6E-06 | 0  |
| cg01636591 | CCL8      | 6355   | FALSE | 0.37(0.26-0.53) | 4E-08 | 6E-06 | 0  |
| cg12022621 | LAX1      | 54900  | FALSE | 2.88(1.97-4.21) | 4E-08 | 6E-06 | 0  |
| cg09305224 | FUT7      | 2529   | FALSE | 0.37(0.26-0.53) | 4E-08 | 7E-06 | 0  |
| cg01040850 | MIR1      | 3140   | FALSE | 2.79(1.93-4.05) | 4E-08 | 7E-06 | 0  |

SuppTable2.txt

|            |         |        |       |                 |       |       |    |
|------------|---------|--------|-------|-----------------|-------|-------|----|
| cg06172871 | HP      | 3240   | FALSE | 0.34(0.23-0.51) | 5E-08 | 7E-06 | 0  |
| cg07728874 | CD3D    | 915    | FALSE | 2.96(2.4.38)    | 5E-08 | 7E-06 | 1  |
| cg17839611 | GNGT2   | 2793   | FALSE | 3.07(2.05-4.62) | 5E-08 | 8E-06 | 0  |
| cg15518883 | SIT1    | 27240  | FALSE | 2.91(1.98-4.28) | 5E-08 | 8E-06 | 1  |
| cg07408456 | PGLYRP2 | 114770 | FALSE | 0.35(0.24-0.51) | 5E-08 | 8E-06 | -1 |
| cg12089698 | SPATC1  | 375686 | TRUE  | 0.36(0.25-0.52) | 5E-08 | 8E-06 | 0  |
| cg04451770 | ENTPD1  | 953    | FALSE | 0.32(0.21-0.48) | 5E-08 | 8E-06 | 0  |
| cg06791867 | TSPAN18 | 90139  | FALSE | 0.34(0.23-0.5)  | 5E-08 | 8E-06 | 0  |
| cg17749456 | HSPBP1  | 23640  | FALSE | 0.36(0.24-0.52) | 6E-08 | 8E-06 | -1 |
| cg03574571 | CD22    | 933    | FALSE | 0.36(0.25-0.52) | 6E-08 | 8E-06 | 0  |
| cg23547429 | SLC43A3 | 29015  | FALSE | 0.35(0.24-0.52) | 6E-08 | 8E-06 | -1 |
| cg09088576 | CSF3R   | 1441   | TRUE  | 0.34(0.23-0.51) | 6E-08 | 8E-06 | 0  |
| cg08399444 | GSG1    | 83445  | FALSE | 0.36(0.25-0.52) | 6E-08 | 8E-06 | 0  |
| cg24612198 | CD3E    | 916    | FALSE | 2.84(1.94-4.15) | 6E-08 | 8E-06 | 0  |
| cg16139316 | S100A9  | 6280   | FALSE | 0.34(0.23-0.51) | 6E-08 | 9E-06 | -1 |
| cg16872071 | RALGDS  | 5900   | FALSE | 0.37(0.26-0.53) | 7E-08 | 9E-06 | 0  |
| cg15958424 | ACPP    | 55     | FALSE | 0.35(0.24-0.52) | 7E-08 | 9E-06 | 0  |
| cg07239938 | ELA2    | 1991   | TRUE  | 0.33(0.22-0.49) | 7E-08 | 9E-06 | -1 |
| cg02635407 | SH3TC1  | 54436  | TRUE  | 0.34(0.23-0.51) | 7E-08 | 9E-06 | 0  |
| cg09208010 | MMP14   | 4323   | TRUE  | 0.34(0.23-0.5)  | 7E-08 | 9E-06 | 0  |
| cg22319147 | CDH5    | 1003   | FALSE | 0.37(0.26-0.53) | 7E-08 | 9E-06 | 0  |
| cg07218880 | UPF3A   | 65110  | TRUE  | 2.71(1.88-3.91) | 8E-08 | 9E-06 | 0  |
| cg24474182 | P2RY13  | 53829  | FALSE | 0.36(0.25-0.53) | 8E-08 | 1E-05 | 0  |
| cg12380764 | IL19    | 29949  | FALSE | 0.34(0.23-0.51) | 8E-08 | 1E-05 | 0  |
| cg25226014 | CXCR6   | 10663  | FALSE | 2.71(1.88-3.91) | 8E-08 | 1E-05 | 1  |
| cg10275770 | ICAM2   | 3384   | FALSE | 0.34(0.23-0.5)  | 9E-08 | 1E-05 | 0  |
| cg08700306 | LRP3    | 4037   | FALSE | 0.36(0.25-0.53) | 9E-08 | 1E-05 | 0  |

SuppTable2.txt

|            |          |        |       |                 |       |       |    |
|------------|----------|--------|-------|-----------------|-------|-------|----|
| cg11898695 | PTCRA    | 171558 | FALSE | 3.08(2.04-4.65) | 9E-08 | 1E-05 | 0  |
| cg01525376 | LCK      | 3932   | FALSE | 2.63(1.84-3.75) | 9E-08 | 1E-05 | 0  |
| cg01526089 | P2RX1    | 5023   | TRUE  | 0.34(0.23-0.51) | 9E-08 | 1E-05 | 0  |
| cg00328227 | C1orf59  | 113802 | TRUE  | 2.71(1.87-3.91) | 9E-08 | 1E-05 | 0  |
| cg20340242 | IL1R2    | 7850   | TRUE  | 0.32(0.21-0.49) | 9E-08 | 1E-05 | 0  |
| cg01367992 | LY9      | 4063   | FALSE | 2.76(1.9-4.01)  | 9E-08 | 1E-05 | 1  |
| cg22016649 | PNPLA2   | 57104  | TRUE  | 0.36(0.25-0.53) | 1E-07 | 1E-05 | -1 |
| cg26206598 | PREX1    | 57580  | FALSE | 0.37(0.25-0.53) | 1E-07 | 1E-05 | 0  |
| cg04653308 | PPP2R4   | 5524   | FALSE | 0.34(0.23-0.51) | 1E-07 | 1E-05 | 0  |
| cg24489015 | LPO      | 4025   | FALSE | 0.34(0.23-0.51) | 1E-07 | 1E-05 | 0  |
| cg14088811 | SPI1     | 6688   | TRUE  | 0.34(0.23-0.51) | 1E-07 | 1E-05 | 0  |
| cg22854223 | CD82     | 3732   | TRUE  | 0.37(0.25-0.53) | 1E-07 | 1E-05 | 0  |
| cg11098259 | AQP9     | 366    | FALSE | 0.36(0.25-0.53) | 1E-07 | 1E-05 | 0  |
| cg15528736 | FCGRT    | 2217   | TRUE  | 0.38(0.27-0.55) | 1E-07 | 1E-05 | 0  |
| cg02595219 | KCNE3    | 10008  | TRUE  | 0.38(0.26-0.54) | 1E-07 | 1E-05 | 0  |
| cg06625767 | F12      | 2161   | FALSE | 0.37(0.26-0.54) | 1E-07 | 1E-05 | 0  |
| cg19812619 | ITGB7    | 3695   | FALSE | 2.72(1.88-3.95) | 1E-07 | 1E-05 | 1  |
| cg06653796 | LIME1    | 54923  | TRUE  | 2.7(1.87-3.92)  | 1E-07 | 1E-05 | 0  |
| cg09624565 | NCF4     | 4689   | FALSE | 0.35(0.24-0.52) | 1E-07 | 1E-05 | 0  |
| cg10057295 | STK24    | 8428   | TRUE  | 0.37(0.25-0.53) | 1E-07 | 1E-05 | -1 |
| cg22088368 | MGC35206 | 339669 | FALSE | 0.37(0.26-0.54) | 1E-07 | 1E-05 | 0  |
| cg01617750 | CMTM8    | 152189 | TRUE  | 0.39(0.28-0.56) | 1E-07 | 1E-05 | 0  |
| cg22799850 | FBXL13   | 222235 | TRUE  | 0.38(0.26-0.54) | 1E-07 | 1E-05 | -1 |
| cg25341726 | IL27     | 246778 | FALSE | 0.38(0.27-0.55) | 1E-07 | 1E-05 | 0  |
| cg00899659 | ZNF22    | 7570   | FALSE | 0.35(0.23-0.52) | 1E-07 | 1E-05 | 0  |
| cg21019522 | SLC22A18 | 5002   | FALSE | 0.35(0.24-0.52) | 1E-07 | 1E-05 | 0  |
| cg24453664 | CD59     | 966    | FALSE | 0.37(0.25-0.54) | 1E-07 | 1E-05 | 0  |

SuppTable2.txt

|            |          |        |       |                 |       |       |    |
|------------|----------|--------|-------|-----------------|-------|-------|----|
| cg06683396 | TMEM55A  | 55529  | FALSE | 0.36(0.25-0.53) | 1E-07 | 1E-05 | 0  |
| cg24091474 | TYROBP   | 7305   | FALSE | 0.36(0.24-0.52) | 1E-07 | 1E-05 | 0  |
| cg22045288 | C10orf91 | 170393 | FALSE | 0.38(0.26-0.54) | 1E-07 | 1E-05 | 0  |
| cg09037813 | LRRFIP1  | 9208   | TRUE  | 0.39(0.27-0.56) | 1E-07 | 1E-05 | 0  |
| cg10061138 | STAB1    | 23166  | FALSE | 0.34(0.23-0.51) | 1E-07 | 1E-05 | 0  |
| cg02473123 | CD7      | 924    | TRUE  | 2.63(1.83-3.78) | 2E-07 | 1E-05 | 0  |
| cg21917349 | APBA2    | 321    | FALSE | 2.73(1.87-3.98) | 2E-07 | 1E-05 | 0  |
| cg06196379 | TREM1    | 54210  | FALSE | 0.36(0.25-0.53) | 2E-07 | 1E-05 | -1 |
| cg20713492 | AQP10    | 89872  | FALSE | 0.37(0.26-0.54) | 2E-07 | 1E-05 | 0  |
| cg12044210 | APBA2    | 321    | FALSE | 2.61(1.82-3.74) | 2E-07 | 2E-05 | 0  |
| cg19464944 | FCGR1A   | 2209   | FALSE | 0.36(0.25-0.53) | 2E-07 | 2E-05 | 0  |
| cg02181506 | SERPINA1 | 5265   | FALSE | 0.35(0.24-0.52) | 2E-07 | 2E-05 | 0  |
| cg17296078 | UBTD1    | 80019  | TRUE  | 0.37(0.25-0.54) | 2E-07 | 2E-05 | 0  |
| cg09626634 | EBI2     | 1880   | FALSE | 2.6(1.81-3.74)  | 2E-07 | 2E-05 | 0  |
| cg03548857 | FFAR2    | 2867   | FALSE | 0.39(0.27-0.55) | 2E-07 | 2E-05 | 0  |
| cg05055150 | MAG      | 4099   | FALSE | 2.81(1.9-4.15)  | 2E-07 | 2E-05 | 0  |
| cg06849477 | PRRS     | 55615  | FALSE | 0.37(0.25-0.54) | 2E-07 | 2E-05 | 0  |
| cg06270401 | DYRK4    | 8798   | FALSE | 0.33(0.21-0.5)  | 2E-07 | 2E-05 | 0  |
| cg05795313 | ZNF641   | 121274 | TRUE  | 0.38(0.27-0.55) | 2E-07 | 2E-05 | 0  |
| cg27285056 | NAPSA    | 9476   | FALSE | 2.78(1.89-4.09) | 2E-07 | 2E-05 | 0  |
| cg17186163 | C10orf10 | 11067  | FALSE | 0.37(0.26-0.54) | 2E-07 | 2E-05 | 0  |
| cg15337006 | ITGAM    | 3684   | FALSE | 0.37(0.26-0.54) | 2E-07 | 2E-05 | 0  |
| cg24841244 | CD3D     | 915    | FALSE | 2.66(1.83-3.84) | 2E-07 | 2E-05 | 1  |
| cg02516189 | CARD9    | 64170  | FALSE | 0.36(0.25-0.53) | 2E-07 | 2E-05 | -1 |
| cg06806711 | MS4A1    | 931    | FALSE | 2.52(1.77-3.58) | 2E-07 | 2E-05 | 0  |
| cg15512851 | FGD2     | 221472 | FALSE | 0.36(0.25-0.53) | 2E-07 | 2E-05 | 0  |
| cg15880738 | CD3G     | 917    | FALSE | 2.61(1.81-3.76) | 3E-07 | 2E-05 | 1  |

SupplTable2.txt

|            |          |        |       |                 |       |       |    |
|------------|----------|--------|-------|-----------------|-------|-------|----|
| cg03311899 | GPR109A  | 338442 | TRUE  | 0.4(0.29-0.57)  | 3E-07 | 2E-05 | 0  |
| cg15125472 | HSPB6    | 126393 | TRUE  | 0.37(0.25-0.54) | 3E-07 | 2E-05 | 0  |
| cg04784315 | GPR21    | 2844   | FALSE | 0.37(0.25-0.54) | 3E-07 | 2E-05 | 0  |
| cg26757673 | IL2RB    | 3560   | FALSE | 2.53(1.77-3.62) | 3E-07 | 2E-05 | 0  |
| cg13634319 | DGKA     | 1606   | FALSE | 2.55(1.78-3.65) | 3E-07 | 2E-05 | 0  |
| cg04164824 | SIGLEC9  | 27180  | FALSE | 0.36(0.25-0.54) | 3E-07 | 2E-05 | 0  |
| cg20764656 | GPX2     | 2877   | FALSE | 0.39(0.27-0.56) | 3E-07 | 2E-05 | 0  |
| cg17001035 | PCGF5    | 84333  | TRUE  | 0.39(0.27-0.56) | 3E-07 | 2E-05 | -1 |
| cg07759587 | TLR8     | 51311  | FALSE | 0.39(0.28-0.56) | 3E-07 | 2E-05 | 0  |
| cg18741908 | GPR160   | 26996  | TRUE  | 0.37(0.25-0.54) | 3E-07 | 2E-05 | 0  |
| cg10126923 | NKG7     | 4818   | FALSE | 0.4(0.28-0.57)  | 3E-07 | 2E-05 | -1 |
| cg13301014 | SPINT2   | 10653  | TRUE  | 0.39(0.27-0.56) | 3E-07 | 2E-05 | 0  |
| cg12971694 | CD72     | 971    | FALSE | 0.38(0.26-0.55) | 3E-07 | 2E-05 | 0  |
| cg15227982 | C10orf26 | 54838  | FALSE | 0.37(0.25-0.54) | 3E-07 | 3E-05 | 0  |
| cg23140706 | NFE2     | 4778   | FALSE | 0.4(0.28-0.57)  | 3E-07 | 3E-05 | 0  |
| cg11384427 | TNFRSF7  | 939    | FALSE | 2.96(1.95-4.48) | 3E-07 | 3E-05 | 1  |
| cg21578541 | TLR9     | 54106  | FALSE | 0.41(0.29-0.57) | 3E-07 | 3E-05 | 0  |
| cg10129493 | CD33     | 945    | FALSE | 0.38(0.27-0.56) | 3E-07 | 3E-05 | 0  |
| cg13578652 | UBASH3A  | 53347  | FALSE | 2.41(1.71-3.38) | 3E-07 | 3E-05 | 0  |
| cg23221013 | MGC2463  | 79037  | FALSE | 2.48(1.74-3.52) | 4E-07 | 3E-05 | 0  |
| cg21400896 | ABI3     | 51225  | FALSE | 2.58(1.79-3.72) | 4E-07 | 3E-05 | 0  |
| cg22681784 | SPINK2   | 6691   | TRUE  | 0.38(0.26-0.55) | 4E-07 | 3E-05 | 0  |
| cg15352315 | CD302    | 9936   | FALSE | 0.4(0.28-0.57)  | 4E-07 | 3E-05 | 0  |
| cg22442090 | GIMAP5   | 55340  | FALSE | 2.57(1.78-3.72) | 4E-07 | 3E-05 | 0  |
| cg26112639 | CIAS1    | 114548 | FALSE | 0.4(0.28-0.57)  | 4E-07 | 3E-05 | 0  |
| cg22381196 | DHODH    | 1723   | TRUE  | 0.4(0.28-0.57)  | 4E-07 | 3E-05 | 0  |
| cg19491035 | MANSC1   | 54682  | TRUE  | 0.4(0.28-0.57)  | 4E-07 | 3E-05 | 0  |

SuppTable2.txt

|            |          |        |       |                 |       |       |    |
|------------|----------|--------|-------|-----------------|-------|-------|----|
| cg08223235 | BCL2     | 596    | TRUE  | 0.4(0.28-0.57)  | 4E-07 | 3E-05 | 0  |
| cg19700658 | UCP3     | 7352   | FALSE | 2.75(1.85-4.08) | 4E-07 | 3E-05 | 0  |
| cg26215727 | SCNN1A   | 6337   | FALSE | 0.39(0.27-0.57) | 4E-07 | 3E-05 | 0  |
| cg19154438 | CKM      | 1158   | FALSE | 2.61(1.79-3.8)  | 5E-07 | 4E-05 | 1  |
| cg03886110 | PECAM1   | 5175   | TRUE  | 0.39(0.27-0.56) | 5E-07 | 4E-05 | -1 |
| cg19399532 | FLJ35530 | 400798 | TRUE  | 0.41(0.29-0.58) | 5E-07 | 4E-05 | 0  |
| cg24643262 | BMX      | 660    | TRUE  | 0.38(0.26-0.55) | 5E-07 | 4E-05 | 0  |
| cg22680812 | EPB42    | 2038   | FALSE | 2.75(1.85-4.09) | 5E-07 | 4E-05 | 0  |
| cg13471990 | ENTPD1   | 953    | FALSE | 0.39(0.27-0.57) | 5E-07 | 4E-05 | 0  |
| cg19531130 | ANGPTL5  | 253935 | FALSE | 0.41(0.29-0.59) | 5E-07 | 4E-05 | 0  |
| cg10266490 | ACOT11   | 26027  | FALSE | 0.39(0.27-0.57) | 6E-07 | 4E-05 | -1 |
| cg23265096 | CTSZ     | 1522   | TRUE  | 0.39(0.27-0.56) | 6E-07 | 4E-05 | 0  |
| cg00718513 |          | 28905  | FALSE | 2.48(1.73-3.56) | 6E-07 | 4E-05 | 0  |
| cg15248035 | CCIN     | 881    | TRUE  | 0.4(0.28-0.58)  | 6E-07 | 4E-05 | 0  |
| cg08766149 | GZMB     | 3002   | FALSE | 2.57(1.78-3.73) | 6E-07 | 4E-05 | 0  |
| cg02225847 | FAM65A   | 79567  | TRUE  | 0.4(0.28-0.57)  | 6E-07 | 4E-05 | 0  |
| cg01578324 | CLIC1    | 1192   | FALSE | 0.39(0.27-0.57) | 6E-07 | 4E-05 | 0  |
| cg18752880 | C1QTNF3  | 114899 | FALSE | 0.41(0.28-0.58) | 6E-07 | 4E-05 | -1 |
| cg09025324 | SART2    | 29940  | TRUE  | 0.41(0.29-0.58) | 6E-07 | 4E-05 | 0  |
| cg02039171 | CEBPE    | 1053   | TRUE  | 0.4(0.28-0.57)  | 6E-07 | 4E-05 | 0  |
| cg20654468 | LPXN     | 9404   | FALSE | 0.37(0.25-0.55) | 6E-07 | 4E-05 | 0  |
| cg16028753 | PODN     | 127435 | TRUE  | 0.41(0.29-0.58) | 7E-07 | 4E-05 | 0  |
| cg09830866 | C16orf24 | 65990  | TRUE  | 2.48(1.73-3.55) | 7E-07 | 5E-05 | 0  |
| cg22224704 | GSTP1    | 2950   | TRUE  | 0.42(0.3-0.59)  | 7E-07 | 5E-05 | -1 |
| cg00415993 | F2RL2    | 2151   | FALSE | 0.4(0.28-0.58)  | 7E-07 | 5E-05 | 0  |
| cg06147863 | SP11     | 6688   | FALSE | 0.39(0.27-0.56) | 7E-07 | 5E-05 | 0  |
| cg24323726 | ZBED2    | 79413  | FALSE | 2.6(1.78-3.8)   | 7E-07 | 5E-05 | 0  |

SuppTable2.txt

|            |          |        |       |                 |       |       |    |
|------------|----------|--------|-------|-----------------|-------|-------|----|
| cg07924575 | HPs4     | 89781  | FALSE | 0.4(0.28-0.57)  | 7E-07 | 5E-05 | 0  |
| cg19843036 | FLJ11155 | 55314  | TRUE  | 0.35(0.23-0.53) | 7E-07 | 5E-05 | 0  |
| cg22266967 | S100P    | 6286   | FALSE | 0.41(0.28-0.58) | 7E-07 | 5E-05 | 0  |
| cg07086380 | TNFALP8  | 25816  | TRUE  | 2.38(1.68-3.36) | 7E-07 | 5E-05 | 0  |
| cg17740645 | GRB7     | 2886   | FALSE | 0.41(0.29-0.59) | 7E-07 | 5E-05 | 0  |
| cg15146752 | EPHA2    | 1969   | TRUE  | 0.42(0.3-0.6)   | 8E-07 | 5E-05 | 0  |
| cg16465939 | KCNQ1    | 3784   | TRUE  | 0.41(0.29-0.59) | 8E-07 | 5E-05 | 0  |
| cg09001777 | FUT3     | 2525   | FALSE | 0.42(0.29-0.59) | 8E-07 | 5E-05 | 0  |
| cg00795812 | PDCD1    | 5133   | TRUE  | 2.6(1.77-3.8)   | 8E-07 | 5E-05 | 0  |
| cg04790874 | CD79A    | 973    | FALSE | 0.41(0.29-0.59) | 8E-07 | 5E-05 | 0  |
| cg09499849 | ACVR1    | 90     | FALSE | 0.42(0.3-0.59)  | 8E-07 | 5E-05 | 0  |
| cg16692277 | GUCY1B2  | 2974   | TRUE  | 0.4(0.28-0.58)  | 8E-07 | 5E-05 | -1 |
| cg10548978 | C10orf27 | 219793 | FALSE | 0.39(0.27-0.57) | 8E-07 | 5E-05 | 0  |
| cg03856723 | PRKACA   | 5566   | FALSE | 0.37(0.25-0.55) | 8E-07 | 5E-05 | 0  |
| cg20777437 | CDCP2    | 200008 | FALSE | 0.41(0.29-0.59) | 8E-07 | 5E-05 | 0  |
| cg08260891 | PPGB     | 5476   | TRUE  | 0.41(0.29-0.59) | 8E-07 | 5E-05 | 0  |
| cg17105014 | GYPC     | 2995   | FALSE | 0.4(0.27-0.57)  | 8E-07 | 5E-05 | -1 |
| cg25957124 | DNAH3    | 55567  | TRUE  | 0.41(0.29-0.59) | 8E-07 | 5E-05 | 0  |
| cg03608974 | ZAK      | 51776  | TRUE  | 0.41(0.29-0.59) | 9E-07 | 5E-05 | 0  |
| cg14324675 | LST1     | 7940   | FALSE | 0.39(0.27-0.57) | 9E-07 | 5E-05 | 0  |
| cg19963522 | PIP3-E   | 26034  | FALSE | 0.42(0.3-0.6)   | 9E-07 | 5E-05 | 0  |
| cg26191951 | RNASE2   | 6036   | FALSE | 0.4(0.28-0.58)  | 9E-07 | 5E-05 | 0  |
| cg20981615 | TXK      | 7294   | FALSE | 2.37(1.67-3.35) | 9E-07 | 5E-05 | 1  |
| cg02656594 | IL21R    | 50615  | FALSE | 0.41(0.28-0.59) | 9E-07 | 5E-05 | 0  |
| cg10148841 | ROBO4    | 54538  | FALSE | 0.42(0.3-0.59)  | 9E-07 | 6E-05 | 0  |
| cg08203715 | ST3GAL4  | 6484   | TRUE  | 0.39(0.27-0.57) | 9E-07 | 6E-05 | 0  |
| cg12535715 | HTRA4    | 203100 | TRUE  | 0.37(0.25-0.56) | 9E-07 | 6E-05 | 0  |

SupplTable2.txt

|            |           |        |       |                 |       |       |    |
|------------|-----------|--------|-------|-----------------|-------|-------|----|
| cg20720686 | POR       | 5447   | FALSE | 0.4(0.28-0.58)  | 1E-06 | 6E-05 | 0  |
| cg20651453 | MAP3K6    | 9064   | TRUE  | 0.41(0.29-0.59) | 1E-06 | 6E-05 | 0  |
| cg25432696 | CXCL6     | 6372   | TRUE  | 0.41(0.29-0.59) | 1E-06 | 6E-05 | 0  |
| cg24292612 | DEFB1     | 1672   | FALSE | 0.44(0.32-0.61) | 1E-06 | 6E-05 | 0  |
| cg07525077 | RMASE3    | 6037   | FALSE | 0.41(0.29-0.59) | 1E-06 | 7E-05 | 0  |
| cg21846903 | VTN       | 7448   | FALSE | 0.42(0.29-0.59) | 1E-06 | 7E-05 | 0  |
| cg17122311 | IL27      | 246778 | FALSE | 0.43(0.3-0.6)   | 1E-06 | 7E-05 | 0  |
| cg05106502 | SCAP1     | 8631   | FALSE | 2.31(1.64-3.24) | 1E-06 | 7E-05 | 0  |
| cg00546897 | LOC284837 | 284837 | FALSE | 0.41(0.28-0.59) | 1E-06 | 7E-05 | -1 |
| cg11657615 | ZDHHC1    | 29800  | TRUE  | 0.37(0.24-0.55) | 1E-06 | 7E-05 | 0  |
| cg11827101 | LOC339789 | 339789 | FALSE | 0.42(0.29-0.59) | 1E-06 | 7E-05 | 0  |
| cg12836863 | BRCAC2    | 675    | TRUE  | 0.42(0.29-0.59) | 1E-06 | 7E-05 | -1 |
| cg12045829 | TNFSF12   | 8742   | TRUE  | 2.26(1.62-3.15) | 1E-06 | 7E-05 | 0  |
| cg22566906 | GRASP     | 160622 | FALSE | 0.41(0.28-0.59) | 1E-06 | 7E-05 | 0  |
| cg26660631 | FLJ32011  | 148930 | FALSE | 2.38(1.67-3.4)  | 1E-06 | 8E-05 | 0  |
| cg24256211 | SAMD4A    | 23034  | TRUE  | 0.41(0.29-0.59) | 1E-06 | 8E-05 | 0  |
| cg20674521 | KCNU4     | 3761   | FALSE | 2.41(1.69-3.43) | 1E-06 | 8E-05 | 0  |
| cg04502814 | SEPP1     | 6414   | FALSE | 0.41(0.29-0.59) | 1E-06 | 8E-05 | 0  |
| cg05044994 | FLJ42393  | 401105 | FALSE | 2.39(1.68-3.42) | 1E-06 | 8E-05 | 0  |
| cg26823505 | CLPS      | 1208   | FALSE | 2.35(1.66-3.33) | 1E-06 | 8E-05 | 0  |
| cg17714799 | CASP6     | 839    | FALSE | 0.42(0.3-0.6)   | 1E-06 | 8E-05 | 0  |
| cg02332073 | TSGA13    | 114960 | FALSE | 0.43(0.3-0.61)  | 2E-06 | 8E-05 | 0  |
| cg16097772 | LYZ       | 4069   | FALSE | 0.41(0.29-0.59) | 2E-06 | 8E-05 | 0  |
| cg24926276 | LRG1      | 116844 | FALSE | 0.4(0.28-0.58)  | 2E-06 | 9E-05 | 0  |
| cg15536230 | H2BFS     | 54145  | TRUE  | 0.44(0.31-0.62) | 2E-06 | 9E-05 | 0  |
| cg01718139 | UNG3033   | 284415 | TRUE  | 0.39(0.27-0.57) | 2E-06 | 9E-05 | 0  |
| cg05037688 | EGFL7     | 51162  | FALSE | 0.4(0.27-0.58)  | 2E-06 | 9E-05 | -1 |

SuppTable2.txt

|            |           |        |       |                 |       |        |    |
|------------|-----------|--------|-------|-----------------|-------|--------|----|
| cg02275294 | SOAT1     | 6646   | TRUE  | 0.42(0.3-0.6)   | 2E-06 | 9E-05  | -1 |
| cg01861509 | SPOCK2    | 9806   | FALSE | 2.32(1.64-3.28) | 2E-06 | 9E-05  | 1  |
| cg09418321 | DYRK4     | 8798   | FALSE | 0.42(0.29-0.6)  | 2E-06 | 9E-05  | 0  |
| cg15743985 | CD22      | 933    | TRUE  | 0.43(0.3-0.61)  | 2E-06 | 9E-05  | 0  |
| cg02540157 | MGC2463   | 79037  | FALSE | 2.42(1.68-3.48) | 2E-06 | 0.0001 | 0  |
| cg05461841 | LOC124220 | 124220 | FALSE | 0.44(0.31-0.62) | 2E-06 | 0.0001 | 0  |
| cg13703437 | FYB       | 2533   | FALSE | 0.43(0.3-0.61)  | 2E-06 | 0.0001 | 0  |
| cg02212836 | LY86      | 9450   | FALSE | 2.43(1.68-3.5)  | 2E-06 | 0.0001 | 0  |
| cg10117369 | LAX1      | 54900  | FALSE | 2.42(1.68-3.48) | 2E-06 | 0.0001 | 0  |
| cg00234961 | ZBED4     | 9889   | TRUE  | 0.43(0.3-0.61)  | 2E-06 | 0.0001 | 0  |
| cg15121304 |           | 3535   | FALSE | 2.73(1.8-4.14)  | 2E-06 | 0.0001 | 1  |
| cg26728422 | C16orf28  | 65259  | TRUE  | 0.42(0.29-0.6)  | 2E-06 | 0.0001 | 0  |
| cg15674432 | SLC26A8   | 116369 | TRUE  | 0.41(0.28-0.59) | 2E-06 | 0.0001 | 0  |
| cg21480743 | PTEN      | 5728   | TRUE  | 0.43(0.3-0.61)  | 2E-06 | 0.0001 | 0  |
| cg21902327 | FGF6      | 2251   | TRUE  | 2.24(1.6-3.12)  | 2E-06 | 0.0001 | 0  |
| cg11494699 | RAG1      | 5896   | FALSE | 3.02(1.91-4.79) | 2E-06 | 0.0001 | 0  |
| cg18096388 | PDOD1     | 5133   | FALSE | 2.31(1.63-3.28) | 2E-06 | 0.0001 | 0  |
| cg18959422 | MYBPH     | 4608   | FALSE | 2.27(1.62-3.19) | 2E-06 | 0.0001 | 0  |
| cg25028542 | ANLN      | 54443  | TRUE  | 0.43(0.31-0.62) | 2E-06 | 0.0001 | -1 |
| cg06154570 | HEYL      | 26508  | TRUE  | 0.44(0.31-0.62) | 2E-06 | 0.0001 | 0  |
| cg00269932 | LAIR2     | 3904   | FALSE | 0.44(0.31-0.62) | 2E-06 | 0.0001 | 0  |
| cg15055101 | SH2D3A    | 10045  | TRUE  | 2.35(1.64-3.36) | 2E-06 | 0.0001 | 1  |
| cg08861115 | IL1F9     | 56300  | FALSE | 2.35(1.64-3.36) | 2E-06 | 0.0001 | 0  |
| cg23228178 | PAD14     | 23569  | FALSE | 2.28(1.62-3.23) | 2E-06 | 0.0001 | 0  |
| cg08351331 | LBP       | 3929   | FALSE | 2.29(1.62-3.24) | 2E-06 | 0.0001 | 0  |
| cg26861460 | PARVG     | 64098  | FALSE | 0.43(0.3-0.61)  | 2E-06 | 0.0001 | 0  |
| cg13650156 | PILRA     | 29992  | FALSE | 0.43(0.3-0.61)  | 3E-06 | 0.0001 | 0  |

SuppTable2.txt

|            |          |        |       |                 |       |        |    |
|------------|----------|--------|-------|-----------------|-------|--------|----|
| cg21237418 | RAB34    | 83871  | TRUE  | 0.43(0.3-0.61)  | 3E-06 | 0.0001 | 0  |
| cg18333690 | PAD14    | 23569  | FALSE | 0.44(0.31-0.62) | 3E-06 | 0.0001 | 0  |
| cg02082571 | CLEGG4A  | 50856  | FALSE | 0.39(0.26-0.58) | 3E-06 | 0.0001 | 0  |
| cg04616963 | XCL1     | 6375   | FALSE | 2.31(1.63-3.29) | 3E-06 | 0.0001 | 1  |
| cg05868799 | NCOA2    | 10499  | TRUE  | 0.41(0.28-0.6)  | 3E-06 | 0.0001 | 0  |
| cg10236239 | SULT1C2  | 27233  | FALSE | 0.44(0.31-0.62) | 3E-06 | 0.0001 | -1 |
| cg23668631 | CAMKK1   | 84254  | FALSE | 0.42(0.29-0.61) | 3E-06 | 0.0001 | -1 |
| cg10517312 | RNF36    | 140691 | FALSE | 2.35(1.64-3.36) | 3E-06 | 0.0001 | 0  |
| cg16003913 | MPG      | 4350   | FALSE | 0.46(0.33-0.64) | 3E-06 | 0.0001 | 0  |
| cg16660041 | IQCF1    | 132141 | FALSE | 2.29(1.62-3.24) | 3E-06 | 0.0001 | 0  |
| cg17676574 | UROC1    | 131669 | FALSE | 2.26(1.6-3.17)  | 3E-06 | 0.0001 | 0  |
| cg17141902 | NINJ1    | 4814   | FALSE | 2.47(1.69-3.62) | 3E-06 | 0.0001 | 0  |
| cg21120249 | FLJ36268 | 401563 | FALSE | 0.44(0.31-0.62) | 3E-06 | 0.0001 | -1 |
| cg09210315 | SLCO4A1  | 28231  | FALSE | 0.45(0.32-0.63) | 3E-06 | 0.0001 | 0  |
| cg12376406 | FAM12B   | 64184  | FALSE | 2.25(1.6-3.18)  | 3E-06 | 0.0001 | 0  |
| cg22467071 | PECAM1   | 5175   | TRUE  | 0.42(0.29-0.61) | 3E-06 | 0.0001 | 0  |
| cg27019278 | EMCN     | 51705  | FALSE | 0.46(0.33-0.64) | 3E-06 | 0.0001 | 0  |
| cg26980692 | SLC15A3  | 51296  | TRUE  | 0.45(0.32-0.63) | 3E-06 | 0.0001 | 0  |
| cg27258399 | HTRA4    | 203100 | TRUE  | 0.43(0.3-0.61)  | 3E-06 | 0.0001 | 0  |
| cg12907644 | SAA2     | 6289   | FALSE | 0.46(0.33-0.64) | 3E-06 | 0.0001 | 0  |
| cg05989054 | GAMT     | 2593   | TRUE  | 0.43(0.3-0.62)  | 3E-06 | 0.0002 | 0  |
| cg25659818 | CCL4     | 6351   | FALSE | 2.31(1.62-3.28) | 3E-06 | 0.0002 | 0  |
| cg18338021 | GZMM     | 3004   | TRUE  | 2.26(1.61-3.18) | 3E-06 | 0.0002 | 0  |
| cg26806924 | PROCR    | 10544  | FALSE | 0.43(0.3-0.62)  | 3E-06 | 0.0002 | 0  |
| cg10896774 | C7orf34  | 135927 | FALSE | 2.15(1.56-2.97) | 3E-06 | 0.0002 | 0  |
| cg19067730 | PPGB     | 5476   | TRUE  | 0.44(0.31-0.62) | 3E-06 | 0.0002 | 0  |
| cg00344372 | HGFAC    | 3083   | FALSE | 0.43(0.3-0.61)  | 4E-06 | 0.0002 | 0  |

SuppTable2.txt

|            |          |        |       |                 |       |        |    |
|------------|----------|--------|-------|-----------------|-------|--------|----|
| cg17527798 | LTF      | 4057   | TRUE  | 0.39(0.26-0.58) | 4E-06 | 0.0002 | 0  |
| cg18854666 | SLC11A1  | 6556   | FALSE | 0.47(0.34-0.65) | 4E-06 | 0.0002 | 0  |
| cg25066857 | GNL1     | 10578  | FALSE | 2.26(1.59-3.2)  | 4E-06 | 0.0002 | 0  |
| cg15407570 | STAB1    | 23166  | FALSE | 0.43(0.3-0.61)  | 4E-06 | 0.0002 | 0  |
| cg02593766 | EPN3     | 55040  | FALSE | 0.45(0.32-0.63) | 4E-06 | 0.0002 | 0  |
| cg13745346 | CBEA2T3  | 863    | TRUE  | 0.43(0.3-0.62)  | 4E-06 | 0.0002 | -1 |
| cg01968530 | C18orf45 | 85019  | TRUE  | 2.46(1.68-3.61) | 4E-06 | 0.0002 | 0  |
| cg25061755 | STON1    | 11037  | FALSE | 2.47(1.68-3.64) | 4E-06 | 0.0002 | 0  |
| cg02490034 | MEST     | 4232   | TRUE  | 0.43(0.3-0.62)  | 4E-06 | 0.0002 | 0  |
| cg09971811 | CST7     | 8530   | FALSE | 0.43(0.3-0.61)  | 4E-06 | 0.0002 | -1 |
| cg04398282 | BRDG1    | 26228  | FALSE | 2.3(1.61-3.29)  | 4E-06 | 0.0002 | 1  |
| cg21030400 | MKNK2    | 2872   | TRUE  | 2.16(1.56-3.01) | 4E-06 | 0.0002 | 0  |
| cg13652336 | DEPDC2   | 80243  | TRUE  | 0.45(0.32-0.64) | 4E-06 | 0.0002 | 0  |
| cg01697865 | IL10RA   | 3587   | TRUE  | 2.4(1.65-3.49)  | 4E-06 | 0.0002 | 1  |
| cg15551881 | TRAF1    | 7185   | FALSE | 2.79(1.79-4.34) | 4E-06 | 0.0002 | 0  |
| cg26954174 | CARD15   | 64127  | FALSE | 0.44(0.3-0.62)  | 4E-06 | 0.0002 | -1 |
| cg22670733 | CHRNA3   | 1136   | TRUE  | 2.33(1.62-3.36) | 5E-06 | 0.0002 | 1  |
| cg05790038 | TRPV3    | 162514 | FALSE | 2.2(1.57-3.09)  | 5E-06 | 0.0002 | 0  |
| cg15746187 | FBXO44   | 93611  | FALSE | 0.45(0.32-0.64) | 5E-06 | 0.0002 | 0  |
| cg02227605 | ROPN1L   | 83853  | TRUE  | 0.42(0.29-0.61) | 5E-06 | 0.0002 | 0  |
| cg26647600 | CCR8     | 1237   | FALSE | 2.32(1.61-3.33) | 5E-06 | 0.0002 | 0  |
| cg07258507 | IL17E    | 64806  | FALSE | 2.29(1.61-3.28) | 5E-06 | 0.0002 | 0  |
| cg14870461 | AER61    | 285203 | TRUE  | 0.44(0.31-0.63) | 5E-06 | 0.0002 | 0  |
| cg18350391 | IL32     | 9235   | FALSE | 2.18(1.56-3.06) | 5E-06 | 0.0002 | 0  |
| cg12613344 | NR1H3    | 10062  | FALSE | 0.46(0.33-0.64) | 5E-06 | 0.0002 | 0  |
| cg24457403 | KRT16    | 3868   | FALSE | 2.22(1.57-3.14) | 5E-06 | 0.0002 | 0  |
| cg24183958 | GRB10    | 2887   | TRUE  | 0.43(0.3-0.62)  | 5E-06 | 0.0002 | 0  |

SupplTable2.txt

|            |          |        |       |                  |       |        |   |
|------------|----------|--------|-------|------------------|-------|--------|---|
| cg24673765 | HSPB6    | 126393 | TRUE  | 0.44(0.31-0.62)  | 5E-06 | 0.0002 | 0 |
| cg23506842 | PTPN7    | 5778   | FALSE | 0.42(0.29-0.61)  | 5E-06 | 0.0002 | 0 |
| cg01182697 | TMEM59   | 9528   | FALSE | 0.46(0.33-0.65)  | 5E-06 | 0.0002 | 0 |
| cg10318258 | RIPK3    | 11035  | FALSE | 2.12(1.53-2.94)  | 5E-06 | 0.0002 | 0 |
| cg07028533 | CNTNAP2  | 26047  | TRUE  | 0.28(0.16-0.48)  | 5E-06 | 0.0002 | 0 |
| cg23889010 | SLPI     | 6590   | FALSE | 0.43(0.3-0.62)   | 5E-06 | 0.0002 | 0 |
| cg19539004 | LIF      | 3976   | FALSE | 0.44(0.31-0.63)  | 5E-06 | 0.0002 | 0 |
| cg08459368 | SCGB2A1  | 4246   | FALSE | 5.01(2.49-10.1)  | 5E-06 | 0.0002 | 0 |
| cg24262469 | TIPARP   | 25976  | TRUE  | 2.11(1.53-2.91)  | 5E-06 | 0.0002 | 0 |
| cg25623459 | TNNI2    | 7136   | FALSE | 0.44(0.31-0.63)  | 6E-06 | 0.0002 | 0 |
| cg26928972 | CSTA     | 1475   | FALSE | 0.45(0.32-0.64)  | 6E-06 | 0.0002 | 0 |
| cg24826667 | IRF8     | 3394   | TRUE  | 5.54(2.64-11.65) | 6E-06 | 0.0002 | 1 |
| cg04430204 | RNF25    | 64320  | FALSE | 0.45(0.32-0.64)  | 6E-06 | 0.0002 | 0 |
| cg08519905 | CD9      | 928    | TRUE  | 0.45(0.32-0.64)  | 6E-06 | 0.0002 | 0 |
| cg04108240 | TRA2A    | 29896  | TRUE  | 0.36(0.23-0.57)  | 6E-06 | 0.0003 | 0 |
| cg01618660 | TRIM14   | 9830   | TRUE  | 0.41(0.28-0.61)  | 6E-06 | 0.0003 | 0 |
| cg02927346 | RASL10B  | 91608  | TRUE  | 0.45(0.32-0.64)  | 6E-06 | 0.0003 | 0 |
| cg04180953 | DSC1     | 1823   | FALSE | 2.21(1.56-3.12)  | 6E-06 | 0.0003 | 0 |
| cg04404982 | ITGAL    | 3683   | FALSE | 2.14(1.53-2.98)  | 6E-06 | 0.0003 | 0 |
| cg06229674 | ARP10    | 164668 | FALSE | 2.4(1.64-3.52)   | 7E-06 | 0.0003 | 0 |
| cg22689690 | ADCY6    | 112    | TRUE  | 0.44(0.3-0.63)   | 7E-06 | 0.0003 | 0 |
| cg11721194 | SLAMF7   | 57823  | FALSE | 2.27(1.59-3.24)  | 7E-06 | 0.0003 | 0 |
| cg18441959 | VPREB1   | 7441   | FALSE | 2.18(1.55-3.06)  | 7E-06 | 0.0003 | 0 |
| cg03533811 | HISPPD2A | 9677   | TRUE  | 0.44(0.31-0.63)  | 7E-06 | 0.0003 | 0 |
| cg23959705 | TNFRSF9  | 3604   | TRUE  | 0.47(0.33-0.65)  | 7E-06 | 0.0003 | 0 |
| cg02357714 | DOK3     | 79930  | FALSE | 0.47(0.34-0.66)  | 7E-06 | 0.0003 | 0 |
| cg16177830 | TNFRSF17 | 608    | FALSE | 2.23(1.57-3.18)  | 7E-06 | 0.0003 | 0 |

SupplTable2.txt

|            |         |        |       |                 |       |        |   |
|------------|---------|--------|-------|-----------------|-------|--------|---|
| cg20790540 | PTCRA   | 171558 | FALSE | 2.24(1.57-3.2)  | 7E-06 | 0.0003 | 0 |
| cg10981541 | FAM57A  | 79850  | TRUE  | 0.44(0.31-0.63) | 7E-06 | 0.0003 | 0 |
| cg11998307 | SCARF1  | 8578   | FALSE | 0.46(0.32-0.65) | 7E-06 | 0.0003 | 0 |
| cg17952262 | MFSDF   | 84179  | FALSE | 0.46(0.33-0.65) | 7E-06 | 0.0003 | 0 |
| cg05615150 | ARPP-21 | 10777  | FALSE | 2.29(1.59-3.31) | 7E-06 | 0.0003 | 0 |
| cg05859264 | MAPK13  | 5603   | FALSE | 2.14(1.53-2.99) | 7E-06 | 0.0003 | 0 |
| cg05508558 | CR2     | 1380   | TRUE  | 2.1(1.52-2.9)   | 8E-06 | 0.0003 | 0 |
| cg19280776 | PAG1    | 55824  | TRUE  | 2.29(1.6-3.26)  | 8E-06 | 0.0003 | 0 |
| cg06810647 | GRAMP1L | 57585  | TRUE  | 0.47(0.33-0.65) | 8E-06 | 0.0003 | 0 |
| cg10758292 | DEFA1   | 1667   | FALSE | 0.46(0.33-0.65) | 8E-06 | 0.0003 | 0 |
| cg23760945 | ELOF1   | 84337  | FALSE | 2.26(1.58-3.25) | 8E-06 | 0.0003 | 1 |
| cg25119415 | MNDA    | 4332   | FALSE | 2.14(1.53-3.01) | 8E-06 | 0.0003 | 0 |
| cg25259754 | FCRL3   | 115352 | FALSE | 2.13(1.52-2.97) | 8E-06 | 0.0003 | 0 |
| cg00620024 | PPP6C   | 5537   | TRUE  | 2.17(1.54-3.07) | 8E-06 | 0.0003 | 1 |
| cg21428681 | NKX3-1  | 4824   | FALSE | 0.47(0.34-0.66) | 8E-06 | 0.0003 | 0 |
| cg07125166 | FBXW12  | 285231 | FALSE | 2.23(1.57-3.16) | 8E-06 | 0.0003 | 0 |
| cg14764661 | MRC2    | 9902   | FALSE | 0.45(0.32-0.64) | 8E-06 | 0.0003 | 0 |
| cg10177528 | TRAF5   | 7188   | TRUE  | 2.23(1.56-3.17) | 8E-06 | 0.0003 | 0 |
| cg16745604 | CASP10  | 843    | FALSE | 0.46(0.32-0.65) | 8E-06 | 0.0003 | 0 |
| cg07156669 | CPD     | 1362   | TRUE  | 2.11(1.52-2.94) | 8E-06 | 0.0003 | 0 |
| cg20395892 | IRAK3   | 11213  | TRUE  | 0.44(0.3-0.63)  | 9E-06 | 0.0003 | 0 |
| cg22628873 | GGT6    | 124975 | TRUE  | 0.45(0.32-0.64) | 9E-06 | 0.0003 | 0 |
| cg00323915 | GIMAP4  | 55303  | FALSE | 2.21(1.55-3.14) | 9E-06 | 0.0003 | 0 |
| cg27345946 | TADA3L  | 10474  | FALSE | 2.11(1.51-2.95) | 9E-06 | 0.0003 | 0 |
| cg11397854 | IQSEC1  | 9922   | TRUE  | 0.46(0.32-0.65) | 9E-06 | 0.0003 | 0 |
| cg05253159 | APS     | 10603  | FALSE | 0.45(0.32-0.64) | 9E-06 | 0.0003 | 0 |
| cg01031251 | RPS6KA1 | 6195   | TRUE  | 0.46(0.33-0.65) | 9E-06 | 0.0003 | 0 |

## SuppTable2.txt

|            |          |        |       |                 |       |        |    |
|------------|----------|--------|-------|-----------------|-------|--------|----|
| cg12554857 | PGDS     | 27306  | FALSE | 0.47(0.33-0.66) | 9E-06 | 0.0003 | 0  |
| cg08529852 | EGFL7    | 51162  | FALSE | 0.49(0.35-0.67) | 9E-06 | 0.0004 | 0  |
| cg01274660 | TRIP6    | 7205   | FALSE | 0.46(0.32-0.65) | 9E-06 | 0.0004 | 0  |
| cg14726637 | CR1      | 1378   | TRUE  | 0.46(0.33-0.65) | 9E-06 | 0.0004 | 0  |
| cg12832565 | CD160    | 11126  | FALSE | 2.1(1.51-2.92)  | 1E-05 | 0.0004 | 0  |
| cg05824215 | CCR6     | 1235   | FALSE | 2.14(1.52-3.01) | 1E-05 | 0.0004 | 0  |
| cg11630392 | GPR171   | 29909  | FALSE | 2.17(1.54-3.08) | 1E-05 | 0.0004 | 0  |
| cg02989940 | ERAF     | 51327  | FALSE | 2.2(1.55-3.13)  | 1E-05 | 0.0004 | 0  |
| cg12100791 | PYCARD   | 29108  | TRUE  | 0.47(0.34-0.66) | 1E-05 | 0.0004 | 0  |
| cg26616347 | IRF5     | 3663   | TRUE  | 0.46(0.32-0.65) | 1E-05 | 0.0004 | 0  |
| cg09276451 | SLITL2   | 114990 | TRUE  | 0.44(0.31-0.64) | 1E-05 | 0.0004 | 0  |
| cg24715735 | HPN      | 3249   | TRUE  | 0.45(0.32-0.64) | 1E-05 | 0.0004 | 0  |
| cg04797323 | SOCS2    | 8835   | TRUE  | 0.43(0.29-0.63) | 1E-05 | 0.0004 | 0  |
| cg00226923 | FGD2     | 221472 | FALSE | 2.63(1.71-4.06) | 1E-05 | 0.0004 | 0  |
| cg12091331 | PLAT     | 5327   | FALSE | 0.48(0.35-0.67) | 1E-05 | 0.0004 | -1 |
| cg09076123 | NCF2     | 4688   | FALSE | 0.48(0.34-0.67) | 1E-05 | 0.0004 | -1 |
| cg20289911 | C20orf55 | 83541  | FALSE | 2.11(1.51-2.95) | 1E-05 | 0.0004 | 0  |
| cg01500140 | LIM2     | 3982   | FALSE | 2.11(1.51-2.93) | 1E-05 | 0.0004 | 0  |
| cg21232015 | CHFR     | 55743  | TRUE  | 2.28(1.58-3.29) | 1E-05 | 0.0004 | 1  |
| cg04925864 | FAM65A   | 79567  | TRUE  | 0.46(0.32-0.65) | 1E-05 | 0.0004 | 0  |
| cg04113075 | RAB32    | 10981  | TRUE  | 0.46(0.32-0.65) | 1E-05 | 0.0005 | -1 |
| cg04757243 | C3orf36  | 80111  | FALSE | 2.18(1.53-3.1)  | 1E-05 | 0.0005 | 0  |
| cg19614321 | RASSF2   | 9770   | FALSE | 0.45(0.31-0.65) | 1E-05 | 0.0005 | -1 |
| cg17461214 | CHML     | 1122   | FALSE | 2.29(1.57-3.32) | 1E-05 | 0.0005 | 0  |
| cg00615377 | RBM9     | 23543  | TRUE  | 0.46(0.33-0.65) | 1E-05 | 0.0005 | 0  |
| cg22286764 | C3orf35  | 339883 | FALSE | 0.5(0.36-0.68)  | 1E-05 | 0.0005 | 0  |
| cg05556202 | TM4SF19  | 116211 | FALSE | 2.39(1.62-3.54) | 1E-05 | 0.0005 | 0  |

SupplTable2.txt

|            |                 |        |       |                 |       |        |    |
|------------|-----------------|--------|-------|-----------------|-------|--------|----|
| cg11394785 | LTC4S           | 4056   | FALSE | 0.46(0.33-0.66) | 1E-05 | 0.0005 | 0  |
| cg20366831 | APBA3           | 9546   | FALSE | 2.08(1.49-2.91) | 1E-05 | 0.0005 | 0  |
| cg04655481 | GPR21           | 2844   | FALSE | 0.47(0.34-0.66) | 1E-05 | 0.0005 | 0  |
| cg16509045 | TRPM6           | 140803 | FALSE | 0.45(0.31-0.65) | 1E-05 | 0.0005 | 0  |
| cg16698623 | MGMT            | 4255   | TRUE  | 2.24(1.55-3.23) | 1E-05 | 0.0005 | 1  |
| cg13553498 | CLEC2D          | 29121  | FALSE | 2.18(1.53-3.1)  | 1E-05 | 0.0005 | 0  |
| cg22534509 | GPR81           | 27198  | TRUE  | 2.14(1.51-3.03) | 1E-05 | 0.0005 | 0  |
| cg24674703 | CD5             | 921    | FALSE | 2.06(1.48-2.87) | 1E-05 | 0.0005 | 0  |
| cg10516886 | CD53            | 963    | FALSE | 2.12(1.5-2.98)  | 1E-05 | 0.0005 | 0  |
| cg27491887 | KCNQ1           | 3784   | TRUE  | 0.45(0.32-0.65) | 1E-05 | 0.0005 | 0  |
| cg08145177 | ABHD8           | 79575  | TRUE  | 0.47(0.33-0.66) | 1E-05 | 0.0005 | 0  |
| cg25298754 | ZBED2           | 79413  | FALSE | 2.12(1.5-2.98)  | 1E-05 | 0.0005 | 0  |
| cg27187881 | NAGA            | 4668   | TRUE  | 0.45(0.31-0.64) | 1E-05 | 0.0005 | -1 |
| cg17166812 | NDUFS2          | 4720   | FALSE | 0.49(0.35-0.68) | 2E-05 | 0.0005 | 0  |
| cg06521852 | HRIHFB2122      | 11078  | TRUE  | 0.48(0.34-0.67) | 2E-05 | 0.0005 | 0  |
| cg04600618 | C6orf206        | 221421 | TRUE  | 0.47(0.33-0.66) | 2E-05 | 0.0005 | 0  |
| cg22438810 | LCN2            | 3934   | FALSE | 0.49(0.36-0.68) | 2E-05 | 0.0005 | 0  |
| cg05246522 | KSR1            | 8844   | FALSE | 2.16(1.52-3.06) | 2E-05 | 0.0005 | 0  |
| cg15691199 | CEBPE           | 1053   | FALSE | 0.48(0.34-0.67) | 2E-05 | 0.0005 | 0  |
| cg10368842 | C10orf81        | 79949  | FALSE | 2.05(1.48-2.85) | 2E-05 | 0.0005 | 0  |
| cg07057831 | EPIM            | 2054   | TRUE  | 2.04(1.48-2.81) | 2E-05 | 0.0005 | 0  |
| cg17271365 | MARCH1          | 55016  | FALSE | 0.5(0.36-0.68)  | 2E-05 | 0.0006 | 0  |
| cg00031162 | TNFSF12-TNFSF13 | 407977 | FALSE | 2.17(1.52-3.11) | 2E-05 | 0.0006 | 0  |
| cg26163537 | GRB10           | 2887   | TRUE  | 0.47(0.33-0.66) | 2E-05 | 0.0006 | 0  |
| cg01129847 | C19orf35        | 374872 | FALSE | 0.47(0.34-0.67) | 2E-05 | 0.0006 | -1 |
| cg17386185 | GLYCTK          | 132158 | TRUE  | 0.47(0.34-0.67) | 2E-05 | 0.0006 | -1 |
| cg12417466 | ARPP-21         | 10777  | FALSE | 2.17(1.52-3.08) | 2E-05 | 0.0006 | 0  |

## SupplTable2.txt

|            |          |        |       |                 |       |        |    |
|------------|----------|--------|-------|-----------------|-------|--------|----|
| cg23579062 | DNAI1    | 27019  | TRUE  | 0.47(0.34-0.67) | 2E-05 | 0.0006 | 0  |
| cg24921089 | AMPD3    | 272    | TRUE  | 0.49(0.35-0.68) | 2E-05 | 0.0006 | 0  |
| cg16989646 | SLC25A15 | 10166  | TRUE  | 0.48(0.35-0.68) | 2E-05 | 0.0006 | 0  |
| cg13504059 | CCR7     | 1236   | FALSE | 2.05(1.48-2.85) | 2E-05 | 0.0006 | 0  |
| cg12014417 | GPR109A  | 338442 | TRUE  | 0.46(0.32-0.66) | 2E-05 | 0.0006 | -1 |
| cg18538812 | GIF      | 2694   | FALSE | 2.17(1.53-3.1)  | 2E-05 | 0.0006 | 0  |
| cg03714916 | CDKN1A   | 1026   | FALSE | 0.49(0.35-0.68) | 2E-05 | 0.0006 | 0  |
| cg16378421 | ABCC5    | 10057  | TRUE  | 0.47(0.33-0.66) | 2E-05 | 0.0006 | 0  |
| cg04286933 | APOBEC3G | 60489  | FALSE | 0.48(0.34-0.67) | 2E-05 | 0.0006 | -1 |
| cg10521852 | EDG4     | 9170   | TRUE  | 0.47(0.33-0.67) | 2E-05 | 0.0006 | 0  |
| cg01965939 | SH3TC2   | 79628  | FALSE | 0.48(0.35-0.68) | 2E-05 | 0.0006 | 0  |
| cg13316191 | CDCA7L   | 55536  | TRUE  | 0.44(0.3-0.64)  | 2E-05 | 0.0006 | 0  |
| cg04491089 | MBTPS1   | 8720   | TRUE  | 2.02(1.47-2.78) | 2E-05 | 0.0006 | 0  |
| cg14898779 | STK31    | 56164  | TRUE  | 0.49(0.36-0.68) | 2E-05 | 0.0006 | 0  |
| cg12586262 | ZNF160   | 90338  | TRUE  | 2.01(1.46-2.78) | 2E-05 | 0.0006 | 0  |
| cg12391783 | NSMCE1   | 197370 | FALSE | 0.46(0.32-0.65) | 2E-05 | 0.0006 | 0  |
| cg00739120 | NIFIE14  | 10430  | TRUE  | 0.49(0.35-0.68) | 2E-05 | 0.0006 | 0  |
| cg15662251 | PAQR7    | 164091 | FALSE | 0.49(0.35-0.68) | 2E-05 | 0.0006 | 0  |
| cg19464252 | FBS1     | 64319  | FALSE | 2.09(1.48-2.94) | 2E-05 | 0.0006 | 0  |
| cg11164400 | PPP1R9A  | 55607  | TRUE  | 0.45(0.31-0.65) | 2E-05 | 0.0006 | 0  |
| cg06736444 | SRRM2    | 23524  | TRUE  | 2.11(1.49-2.95) | 2E-05 | 0.0006 | 0  |
| cg21283680 | SH3BP5   | 9467   | FALSE | 0.49(0.35-0.68) | 2E-05 | 0.0006 | 0  |
| cg01172735 | SESN2    | 83667  | TRUE  | 0.46(0.32-0.66) | 2E-05 | 0.0006 | 0  |
| cg08965143 | TP53I3   | 9540   | TRUE  | 0.46(0.32-0.66) | 2E-05 | 0.0006 | 0  |
| cg20993403 | EPB41L1  | 2036   | FALSE | 2.14(1.5-3.04)  | 2E-05 | 0.0007 | 0  |
| cg08241785 | F2RL2    | 2151   | FALSE | 0.46(0.33-0.66) | 2E-05 | 0.0007 | -1 |
| cg24456340 | GNGT2    | 2793   | TRUE  | 2.07(1.48-2.9)  | 2E-05 | 0.0007 | 0  |

SuppTable2.txt

|            |           |        |       |                 |       |        |    |
|------------|-----------|--------|-------|-----------------|-------|--------|----|
| cg10494770 | IGLL1     | 3543   | FALSE | 0.49(0.35-0.68) | 2E-05 | 0.0007 | 0  |
| cg23713742 | SPAG4     | 6676   | FALSE | 0.49(0.36-0.69) | 2E-05 | 0.0007 | 0  |
| cg03763616 | SPIB      | 6689   | FALSE | 0.49(0.35-0.68) | 2E-05 | 0.0007 | 0  |
| cg00168785 | WDSUB1    | 151525 | TRUE  | 0.49(0.35-0.68) | 2E-05 | 0.0007 | 0  |
| cg14292823 | TIGD5     | 84948  | TRUE  | 0.47(0.33-0.67) | 2E-05 | 0.0007 | 0  |
| cg04490714 | SLC6A2    | 6530   | TRUE  | 0.36(0.23-0.58) | 2E-05 | 0.0007 | 0  |
| cg08510456 | BSN       | 8927   | TRUE  | 0.45(0.31-0.65) | 2E-05 | 0.0007 | 0  |
| cg23606023 | CBFA2T3   | 863    | FALSE | 0.49(0.35-0.68) | 2E-05 | 0.0007 | 0  |
| cg11105610 | LGALS3BP  | 3959   | FALSE | 2.17(1.51-3.12) | 2E-05 | 0.0007 | 0  |
| cg18413900 | CYP27B1   | 1594   | FALSE | 0.48(0.34-0.67) | 2E-05 | 0.0007 | 0  |
| cg26989531 | CCND2     | 894    | TRUE  | 2.02(1.46-2.79) | 2E-05 | 0.0007 | 0  |
| cg03270167 | RAMP1     | 10267  | TRUE  | 0.49(0.35-0.68) | 2E-05 | 0.0007 | 0  |
| cg22322184 | RETN      | 56729  | FALSE | 0.48(0.34-0.67) | 2E-05 | 0.0007 | 0  |
| cg08815403 | HSD17B13  | 345275 | FALSE | 2.11(1.49-2.98) | 2E-05 | 0.0007 | 0  |
| cg24070847 | HIST2H2BE | 8349   | TRUE  | 2(1.45-2.75)    | 2E-05 | 0.0007 | 0  |
| cg11738543 | SOCS2     | 8835   | TRUE  | 0.44(0.3-0.65)  | 2E-05 | 0.0007 | 0  |
| cg04536922 | FAM13A1   | 10144  | FALSE | 0.46(0.32-0.66) | 2E-05 | 0.0007 | 0  |
| cg02310296 | MMP9      | 4318   | FALSE | 0.48(0.34-0.67) | 2E-05 | 0.0007 | 0  |
| cg09554443 | CD3Z      | 919    | TRUE  | 1.97(1.43-2.71) | 2E-05 | 0.0007 | 1  |
| cg21633698 | THY1      | 7070   | FALSE | 2(1.45-2.77)    | 2E-05 | 0.0007 | 0  |
| cg07658590 | SLC19A1   | 6573   | FALSE | 0.47(0.33-0.67) | 2E-05 | 0.0007 | -1 |
| cg05615487 | ACR       | 49     | FALSE | 2.03(1.45-2.83) | 2E-05 | 0.0007 | 0  |
| cg09106999 | CDK2      | 1017   | FALSE | 0.49(0.35-0.68) | 2E-05 | 0.0007 | 0  |
| cg26392924 | SLC23A1   | 9963   | FALSE | 0.49(0.35-0.68) | 2E-05 | 0.0007 | 0  |
| cg11584690 | ZNF574    | 64763  | FALSE | 0.48(0.34-0.67) | 2E-05 | 0.0007 | 0  |
| cg10465696 | ROBO4     | 54538  | TRUE  | 0.48(0.34-0.68) | 2E-05 | 0.0008 | 0  |
| cg12243271 | CFI       | 3426   | FALSE | 0.45(0.31-0.66) | 3E-05 | 0.0008 | 0  |

SupplTable2.txt

|            |          |        |       |                 |       |        |    |
|------------|----------|--------|-------|-----------------|-------|--------|----|
| cg02786019 | TRPV6    | 55503  | FALSE | 2.1(1.48-2.97)  | 3E-05 | 0.0008 | 0  |
| cg26233914 | ITGAX    | 3687   | FALSE | 0.45(0.31-0.66) | 3E-05 | 0.0008 | -1 |
| cg09427311 | ANGPTL2  | 23452  | FALSE | 0.48(0.34-0.68) | 3E-05 | 0.0008 | -1 |
| cg16854606 | DAND5    | 199699 | FALSE | 2.0(1.45-2.8)   | 3E-05 | 0.0008 | 0  |
| cg08290628 | CORO2B   | 10391  | FALSE | 0.51(0.37-0.7)  | 3E-05 | 0.0008 | 0  |
| cg19787037 | SPAG11   | 10407  | FALSE | 2.06(1.47-2.9)  | 3E-05 | 0.0008 | 0  |
| cg11965370 | HNT      | 50863  | TRUE  | 0.5(0.36-0.69)  | 3E-05 | 0.0008 | 0  |
| cg12491710 | LIM2     | 3982   | TRUE  | 2.21(1.54-3.17) | 3E-05 | 0.0008 | 0  |
| cg07360692 | FLJ20032 | 54790  | TRUE  | 0.5(0.36-0.69)  | 3E-05 | 0.0008 | 0  |
| cg23854009 | ZNF530   | 348327 | TRUE  | 0.46(0.32-0.66) | 3E-05 | 0.0008 | 0  |
| cg20530056 | IKBKE    | 9641   | FALSE | 2.12(1.49-3.03) | 3E-05 | 0.0008 | 0  |
| cg19168338 | CORO7    | 79585  | TRUE  | 0.46(0.32-0.66) | 3E-05 | 0.0008 | -1 |
| cg25112191 | RORC     | 6097   | FALSE | 0.51(0.37-0.7)  | 3E-05 | 0.0008 | 0  |
| cg07426848 | S100A3   | 6274   | FALSE | 2.14(1.49-3.06) | 3E-05 | 0.0008 | 0  |
| cg06029655 | SBP1     | 90198  | FALSE | 2.3(1.56-3.38)  | 3E-05 | 0.0008 | 0  |
| cg07914866 | IRAK3    | 11213  | TRUE  | 0.5(0.36-0.69)  | 3E-05 | 0.0009 | 0  |
| cg10872212 | KLHDC8B  | 200942 | TRUE  | 0.48(0.34-0.68) | 3E-05 | 0.0009 | 0  |
| cg17682828 | FXYD7    | 53822  | TRUE  | 2.22(1.53-3.22) | 3E-05 | 0.0009 | 0  |
| cg00615241 | PRTN3    | 5657   | FALSE | 0.52(0.38-0.71) | 3E-05 | 0.0009 | 0  |
| cg11668844 | MCF2L    | 23263  | TRUE  | 0.49(0.35-0.69) | 3E-05 | 0.0009 | 0  |
| cg14861570 | MMD      | 23531  | FALSE | 2.08(1.48-2.92) | 3E-05 | 0.0009 | 0  |
| cg00013618 |          | 3535   | FALSE | 2.07(1.46-2.93) | 3E-05 | 0.0009 | 0  |
| cg14150666 | IL8RB    | 3579   | FALSE | 0.52(0.38-0.7)  | 3E-05 | 0.0009 | 0  |
| cg22485810 | CENTA2   | 55803  | TRUE  | 0.48(0.34-0.68) | 3E-05 | 0.0009 | 0  |
| cg11484872 | TNF      | 7124   | FALSE | 1.99(1.45-2.74) | 3E-05 | 0.0009 | 0  |
| cg17468997 | NCF1     | 4687   | FALSE | 0.49(0.35-0.69) | 3E-05 | 0.0009 | 0  |
| cg14761227 | CPA1     | 1357   | FALSE | 2.1(1.47-2.98)  | 3E-05 | 0.0009 | 0  |

SupplTable2.txt

|            |          |        |       |                 |       |        |    |
|------------|----------|--------|-------|-----------------|-------|--------|----|
| cg05190718 | CASQ2    | 845    | FALSE | 2.05(1.46-2.87) | 3E-05 | 0.0009 | 0  |
| cg13735974 | NEFYC    | 4802   | TRUE  | 2.14(1.49-3.06) | 3E-05 | 0.0009 | 0  |
| cg03649060 | ELOF1    | 84337  | FALSE | 2.29(1.54-3.39) | 3E-05 | 0.0009 | 0  |
| cg13299148 | COL16A1  | 1307   | FALSE | 0.47(0.33-0.68) | 3E-05 | 0.0009 | 0  |
| cg27223047 | FBN2     | 2201   | TRUE  | 0.49(0.35-0.69) | 3E-05 | 0.0009 | 0  |
| cg14162076 | CLEC4D   | 338339 | TRUE  | 2.67(1.67-4.27) | 3E-05 | 0.0009 | 0  |
| cg11832722 | DSC3     | 1825   | TRUE  | 0.47(0.33-0.66) | 3E-05 | 0.001  | 0  |
| cg22289810 | NF1      | 4763   | TRUE  | 2.03(1.46-2.83) | 4E-05 | 0.001  | 0  |
| cg24354652 | PTAFR    | 5724   | FALSE | 0.5(0.36-0.7)   | 4E-05 | 0.001  | 0  |
| cg13531460 | GPR55    | 9290   | FALSE | 2.71(1.68-4.38) | 4E-05 | 0.001  | 0  |
| cg06151964 | HPN      | 3249   | TRUE  | 0.5(0.36-0.69)  | 4E-05 | 0.001  | 0  |
| cg25725843 | ST6GAL2  | 84620  | TRUE  | 0.43(0.29-0.64) | 4E-05 | 0.001  | 0  |
| cg02100848 | C3orf32  | 51066  | FALSE | 2.17(1.5-3.15)  | 4E-05 | 0.001  | 0  |
| cg21033855 | ZNF690   | 146050 | TRUE  | 0.5(0.36-0.7)   | 4E-05 | 0.001  | 0  |
| cg07705835 | IL17RC   | 84818  | FALSE | 0.48(0.34-0.68) | 4E-05 | 0.001  | -1 |
| cg02569613 | C10orf72 | 196740 | TRUE  | 0.48(0.34-0.68) | 4E-05 | 0.001  | 0  |
| cg00513220 | MOSC2    | 54996  | TRUE  | 0.5(0.36-0.7)   | 4E-05 | 0.001  | 0  |
| cg11277126 | TRPC4AP  | 26133  | TRUE  | 2.09(1.47-2.95) | 4E-05 | 0.001  | 0  |
| cg10094443 | UGDH     | 7358   | TRUE  | 0.49(0.35-0.69) | 4E-05 | 0.001  | 0  |
| cg11846968 | PLUNC    | 51297  | FALSE | 0.52(0.38-0.71) | 4E-05 | 0.001  | 0  |
| cg15052335 | LPIN2    | 9663   | TRUE  | 2.07(1.46-2.92) | 4E-05 | 0.001  | 0  |
| cg09076077 | FLJ33860 | 284756 | TRUE  | 0.48(0.34-0.68) | 4E-05 | 0.001  | 0  |
| cg17738194 | GK2      | 2712   | TRUE  | 2(1.44-2.77)    | 4E-05 | 0.001  | 0  |
| cg00491404 | EPS8L3   | 79574  | FALSE | 2.1(1.47-3)     | 4E-05 | 0.001  | 0  |
| cg20083676 | EDG3     | 1903   | TRUE  | 0.51(0.37-0.7)  | 4E-05 | 0.001  | 0  |
| cg11835355 | APOL3    | 80833  | FALSE | 0.52(0.38-0.71) | 4E-05 | 0.001  | 0  |
| cg22876908 | DGKA     | 1606   | FALSE | 2(1.43-2.8)     | 4E-05 | 0.001  | 0  |

SuppTable2.txt

|            |          |        |       |                 |       |       |    |
|------------|----------|--------|-------|-----------------|-------|-------|----|
| cg03600318 | SFTPD    | 6441   | FALSE | 0.51(0.37-0.7)  | 4E-05 | 0.001 | 0  |
| cg20018806 | TCN1     | 6947   | FALSE | 0.51(0.37-0.7)  | 4E-05 | 0.001 | 0  |
| cg22285621 | SSH3     | 54961  | TRUE  | 0.47(0.32-0.68) | 4E-05 | 0.001 | 0  |
| cg11714502 | AK1      | 203    | TRUE  | 0.51(0.37-0.71) | 4E-05 | 0.001 | -1 |
| cg20790056 | MGC23244 | 126259 | FALSE | 2.2(1.5-3.21)   | 4E-05 | 0.001 | 1  |
| cg11271605 | STEAP4   | 79689  | TRUE  | 0.49(0.35-0.69) | 4E-05 | 0.001 | 0  |
| cg26267561 | OXT      | 5020   | TRUE  | 0.5(0.36-0.7)   | 4E-05 | 0.001 | 0  |
| cg20535085 | SLAMF1   | 6504   | FALSE | 2.03(1.44-2.86) | 4E-05 | 0.001 | 1  |
| cg22775000 | TMEFF1   | 8577   | TRUE  | 0.51(0.37-0.71) | 4E-05 | 0.001 | 0  |
| cg16046376 | PC       | 5091   | FALSE | 0.51(0.37-0.71) | 4E-05 | 0.001 | 0  |
| cg23577242 | MPPED2   | 744    | FALSE | 0.45(0.3-0.66)  | 5E-05 | 0.001 | 0  |
| cg20287234 | GPR35    | 9290   | TRUE  | 0.49(0.35-0.69) | 5E-05 | 0.001 | 0  |
| cg15820955 | HDAC7A   | 51564  | FALSE | 2.09(1.46-2.98) | 5E-05 | 0.001 | 0  |
| cg18940763 | XBP1     | 7494   | TRUE  | 0.48(0.33-0.68) | 5E-05 | 0.001 | 0  |
| cg21474838 | KLRD1    | 3824   | FALSE | 2.12(1.47-3.04) | 5E-05 | 0.001 | 0  |
| cg24352688 | OFD1     | 8481   | FALSE | 2.01(1.43-2.82) | 5E-05 | 0.001 | 0  |
| cg13688966 | TM4SF4   | 7104   | FALSE | 2.02(1.44-2.83) | 5E-05 | 0.001 | 0  |
| cg04121983 | CASKIN2  | 57513  | TRUE  | 0.51(0.37-0.71) | 5E-05 | 0.001 | 0  |
| cg20191453 | AMT      | 275    | TRUE  | 0.48(0.34-0.69) | 5E-05 | 0.001 | 0  |
| cg06256735 | MFAP5    | 8076   | FALSE | 2.36(1.56-3.56) | 5E-05 | 0.001 | 0  |
| cg22858861 | CCDC5    | 115106 | TRUE  | 2.12(1.48-3.05) | 5E-05 | 0.001 | 0  |
| cg20904010 | SYN3     | 8224   | FALSE | 2.31(1.55-3.45) | 5E-05 | 0.001 | 0  |
| cg26304237 | DNAJC6   | 9829   | TRUE  | 0.48(0.33-0.68) | 5E-05 | 0.001 | 0  |
| cg12113819 | THRAP2   | 23389  | TRUE  | 0.5(0.36-0.7)   | 5E-05 | 0.001 | -1 |
| cg06311778 | TENC1    | 23371  | TRUE  | 0.51(0.36-0.71) | 5E-05 | 0.001 | 0  |
| cg23307338 | MS4A12   | 54860  | FALSE | 2.07(1.46-2.95) | 5E-05 | 0.001 | 0  |
| cg13500819 | PACAP    | 51237  | FALSE | 2.09(1.46-3)    | 5E-05 | 0.001 | 0  |

SupplTable2.txt

|             |           |        |       |                 |       |       |    |
|-------------|-----------|--------|-------|-----------------|-------|-------|----|
| cg15013019  | LYL1      | 4066   | TRUE  | 0.5(0.36-0.7)   | 5E-05 | 0.001 | 0  |
| cg000622552 | ODF3L1    | 161753 | FALSE | 0.5(0.35-0.7)   | 5E-05 | 0.001 | -1 |
| cg10305797  | UNQ467    | 388533 | FALSE | 2.17(1.49-3.15) | 5E-05 | 0.001 | 0  |
| cg23181133  | CEACAM3   | 1084   | FALSE | 0.52(0.38-0.72) | 5E-05 | 0.001 | 0  |
| cg11473104  | NUDT15    | 55270  | TRUE  | 2.51(1.6-3.93)  | 5E-05 | 0.001 | 0  |
| cg22321558  | FLJ90024  | 129303 | TRUE  | 0.49(0.34-0.69) | 5E-05 | 0.001 | 0  |
| cg15796819  | ALDH3A1   | 218    | FALSE | 1.99(1.43-2.78) | 5E-05 | 0.001 | 0  |
| cg21448423  | ACOT11    | 26027  | FALSE | 0.52(0.38-0.72) | 5E-05 | 0.001 | -1 |
| cg03310469  | SIX2      | 10736  | TRUE  | 0.46(0.32-0.67) | 5E-05 | 0.001 | 0  |
| cg09500672  | MGC52057  | 130574 | TRUE  | 0.5(0.36-0.69)  | 5E-05 | 0.001 | 0  |
| cg16270990  | C11orf44  | 283171 | FALSE | 1.98(1.42-2.77) | 5E-05 | 0.001 | 0  |
| cg00278366  | RAD9B     | 144715 | TRUE  | 0.52(0.37-0.71) | 5E-05 | 0.001 | 0  |
| cg14102807  | CD19      | 930    | FALSE | 2.17(1.49-3.15) | 5E-05 | 0.001 | 0  |
| cg20781967  | NINJ2     | 4815   | FALSE | 1.92(1.4-2.65)  | 5E-05 | 0.001 | 0  |
| cg21207436  | C14orf115 | 55237  | FALSE | 1.97(1.41-2.74) | 5E-05 | 0.001 | 0  |
| cg14700707  | NOTCH4    | 4855   | FALSE | 0.5(0.36-0.7)   | 5E-05 | 0.001 | -1 |
| cg12962778  | ZNF385    | 25946  | FALSE | 0.53(0.39-0.72) | 5E-05 | 0.001 | 0  |
| cg26111757  | C20orf185 | 359710 | FALSE | 1.96(1.41-2.72) | 5E-05 | 0.001 | 0  |
| cg11360718  | TM9SF4    | 9777   | FALSE | 1.94(1.4-2.68)  | 5E-05 | 0.001 | 0  |
| cg07509155  | IL28RA    | 163702 | TRUE  | 0.49(0.34-0.7)  | 5E-05 | 0.001 | 0  |
| cg17753124  | IER2      | 9592   | FALSE | 0.51(0.37-0.71) | 6E-05 | 0.001 | 0  |
| cg00331237  | CSRP2     | 1466   | TRUE  | 0.51(0.37-0.71) | 6E-05 | 0.001 | 0  |
| cg15582789  | SILC35D2  | 11046  | TRUE  | 0.52(0.38-0.72) | 6E-05 | 0.001 | 0  |
| cg21372914  | CLEC4M    | 10332  | FALSE | 1.97(1.41-2.75) | 6E-05 | 0.001 | 0  |
| cg24821554  | GUCCY1B2  | 2974   | FALSE | 0.51(0.36-0.71) | 6E-05 | 0.001 | -1 |
| cg01143454  | C20orf141 | 128653 | FALSE | 0.52(0.37-0.72) | 6E-05 | 0.001 | 0  |
| cg04198824  | USPL1     | 10208  | TRUE  | 1.97(1.41-2.74) | 6E-05 | 0.001 | 0  |

## SuppTable2.txt

|            |          |        |       |                 |       |       |    |
|------------|----------|--------|-------|-----------------|-------|-------|----|
| cg12491659 | FLJ33641 | 202309 | FALSE | 0.52(0.37-0.71) | 6E-05 | 0.001 | 0  |
| cg00619207 | DENND2D  | 79961  | FALSE | 1.93(1.4-2.68)  | 6E-05 | 0.001 | 0  |
| cg00823148 | CRYGB    | 1419   | FALSE | 1.99(1.42-2.79) | 6E-05 | 0.001 | 0  |
| cg13349425 | C5orf20  | 140947 | FALSE | 2.11(1.47-3.03) | 6E-05 | 0.001 | 0  |
| cg26379475 | SH2D1B   | 117157 | FALSE | 2.13(1.48-3.07) | 6E-05 | 0.002 | 0  |
| cg20956314 | XVLB     | 9942   | FALSE | 0.43(0.28-0.65) | 6E-05 | 0.002 | 0  |
| cg13350783 | KRT13    | 3860   | FALSE | 2.13(1.48-3.08) | 6E-05 | 0.002 | 0  |
| cg00554250 | NR1H3    | 10062  | FALSE | 0.5(0.36-0.71)  | 6E-05 | 0.002 | 0  |
| cg01120308 | PICALM   | 8301   | FALSE | 0.5(0.36-0.71)  | 6E-05 | 0.002 | 0  |
| cg25402049 | PRDM2    | 7799   | FALSE | 0.53(0.39-0.72) | 6E-05 | 0.002 | 0  |
| cg08840010 | TNFRSF9  | 3604   | FALSE | 0.5(0.36-0.71)  | 6E-05 | 0.002 | 0  |
| cg17995823 | CTNND1   | 1500   | FALSE | 0.48(0.33-0.69) | 6E-05 | 0.002 | 0  |
| cg22630748 | INHBE    | 83729  | FALSE | 0.52(0.37-0.72) | 6E-05 | 0.002 | 0  |
| cg13760253 | DNAJC5B  | 85479  | FALSE | 0.52(0.38-0.72) | 6E-05 | 0.002 | 0  |
| cg25216696 | GATA4    | 2626   | TRUE  | 0.47(0.33-0.68) | 6E-05 | 0.002 | 0  |
| cg08743392 | GSS      | 2937   | TRUE  | 0.47(0.32-0.69) | 6E-05 | 0.002 | -1 |
| cg01560871 | C10orf27 | 219793 | FALSE | 0.5(0.35-0.7)   | 7E-05 | 0.002 | -1 |
| cg01449591 | BIRC1    | 4671   | FALSE | 2.01(1.42-2.85) | 7E-05 | 0.002 | 0  |
| cg23499956 | S100A16  | 140576 | FALSE | 2.04(1.44-2.89) | 7E-05 | 0.002 | 0  |
| cg27347104 | VWF      | 7450   | FALSE | 0.51(0.37-0.71) | 7E-05 | 0.002 | -1 |
| cg16335762 | CMTM3    | 123920 | TRUE  | 2.03(1.43-2.89) | 7E-05 | 0.002 | 0  |
| cg00666746 | SYDE1    | 85360  | TRUE  | 0.52(0.37-0.72) | 7E-05 | 0.002 | 0  |
| cg20483374 | C1QTNF5  | 114902 | TRUE  | 0.53(0.39-0.72) | 7E-05 | 0.002 | 0  |
| cg17463527 | SGK2     | 10110  | FALSE | 1.97(1.41-2.77) | 7E-05 | 0.002 | 0  |
| cg09350141 | PPM1F    | 9647   | TRUE  | 0.51(0.37-0.71) | 7E-05 | 0.002 | 0  |
| cg15779716 | CDGP1    | 64866  | TRUE  | 0.53(0.38-0.73) | 7E-05 | 0.002 | 0  |
| cg09791681 | TMCO3    | 55002  | TRUE  | 1.92(1.39-2.66) | 7E-05 | 0.002 | 0  |

SupplTable2.txt

|            |           |        |       |                 |       |       |    |
|------------|-----------|--------|-------|-----------------|-------|-------|----|
| cg00850538 | CRIM1     | 51232  | TRUE  | 0.5(0.35-0.71)  | 7E-05 | 0.002 | 0  |
| cg12412075 | LINTB     | 64130  | TRUE  | 0.51(0.37-0.71) | 7E-05 | 0.002 | 0  |
| cg01172972 | ZFYVE9    | 9372   | TRUE  | 0.5(0.36-0.71)  | 7E-05 | 0.002 | -1 |
| cg00679556 | TRIM31    | 11074  | FALSE | 2.12(1.46-3.06) | 7E-05 | 0.002 | 0  |
| cg20856834 | OR12D3    | 81797  | FALSE | 1.93(1.39-2.69) | 7E-05 | 0.002 | 0  |
| cg21892409 | C11orf49  | 79096  | TRUE  | 1.95(1.4-2.72)  | 7E-05 | 0.002 | 0  |
| cg19008649 | IGFBP5    | 3488   | TRUE  | 0.49(0.34-0.7)  | 7E-05 | 0.002 | 0  |
| cg10315334 | CCL5      | 6352   | FALSE | 1.91(1.38-2.65) | 7E-05 | 0.002 | 0  |
| cg13243219 | MDS1      | 4197   | TRUE  | 1.91(1.38-2.63) | 7E-05 | 0.002 | 0  |
| cg07638935 | KAZALD1   | 81621  | TRUE  | 0.43(0.28-0.65) | 7E-05 | 0.002 | 0  |
| cg06392589 | FNDG6     | 152028 | FALSE | 0.52(0.38-0.72) | 7E-05 | 0.002 | 0  |
| cg01550148 | H2AFY     | 9555   | TRUE  | 0.51(0.36-0.71) | 7E-05 | 0.002 | 0  |
| cg18152830 | TNFRSF13B | 23495  | FALSE | 2.24(1.5-3.34)  | 8E-05 | 0.002 | 0  |
| cg17329164 | PPT2      | 9374   | TRUE  | 0.53(0.39-0.73) | 8E-05 | 0.002 | 0  |
| cg22705225 | PDZK3     | 23037  | TRUE  | 0.54(0.39-0.73) | 8E-05 | 0.002 | 0  |
| cg13030582 | MFAP4     | 4239   | FALSE | 0.51(0.37-0.72) | 8E-05 | 0.002 | 0  |
| cg10997248 | FXYD2     | 486    | FALSE | 1.94(1.39-2.69) | 8E-05 | 0.002 | 0  |
| cg14951292 | HMOX2     | 3163   | TRUE  | 1.9(1.38-2.61)  | 8E-05 | 0.002 | 0  |
| cg02794695 | SLA       | 6503   | FALSE | 2.06(1.44-2.96) | 8E-05 | 0.002 | 0  |
| cg19005368 | PRRG4     | 79056  | TRUE  | 0.51(0.36-0.71) | 8E-05 | 0.002 | 0  |
| cg05751148 | PTPRCAP   | 5790   | FALSE | 1.95(1.39-2.72) | 8E-05 | 0.002 | 0  |
| cg24862483 | CD300LG   | 146894 | TRUE  | 0.52(0.37-0.72) | 8E-05 | 0.002 | 0  |
| cg26227465 | IFNG      | 3458   | FALSE | 1.96(1.4-2.75)  | 8E-05 | 0.002 | 0  |
| cg20840847 | APBA2     | 321    | FALSE | 2.11(1.46-3.06) | 8E-05 | 0.002 | 0  |
| cg03821311 | HIST1H1B  | 3009   | FALSE | 0.51(0.36-0.71) | 9E-05 | 0.002 | 0  |
| cg18109798 | SLCO1C1   | 53919  | FALSE | 1.9(1.38-2.61)  | 9E-05 | 0.002 | 0  |
| cg14435807 | LOXL1     | 4016   | TRUE  | 0.49(0.34-0.7)  | 9E-05 | 0.002 | -1 |

SuppTable2.txt

|            |           |        |       |                 |        |       |    |
|------------|-----------|--------|-------|-----------------|--------|-------|----|
| cg07409200 | FLJ40919  | 144809 | FALSE | 0.5(0.35-0.71)  | 9E-05  | 0.002 | 0  |
| cg06426831 | SLOC35A3  | 23443  | TRUE  | 0.53(0.39-0.73) | 9E-05  | 0.002 | -1 |
| cg24881834 | ME1       | 4199   | TRUE  | 0.44(0.29-0.66) | 9E-05  | 0.002 | 0  |
| cg02605634 | WFDC10A   | 140832 | FALSE | 0.48(0.33-0.7)  | 9E-05  | 0.002 | 0  |
| cg09990086 | TACC1     | 6867   | TRUE  | 0.52(0.38-0.72) | 9E-05  | 0.002 | 0  |
| cg01573562 | RPH3A     | 22895  | TRUE  | 0.49(0.34-0.7)  | 9E-05  | 0.002 | 0  |
| cg10001720 | LAPTM5    | 7805   | FALSE | 0.53(0.39-0.73) | 9E-05  | 0.002 | 0  |
| cg10737521 | KIAA0676  | 23061  | TRUE  | 0.53(0.38-0.73) | 9E-05  | 0.002 | 0  |
| cg14785479 | SCARF2    | 91179  | TRUE  | 0.46(0.31-0.68) | 9E-05  | 0.002 | 0  |
| cg23412777 | PYGO1     | 26108  | TRUE  | 0.52(0.38-0.72) | 9E-05  | 0.002 | 0  |
| cg15952487 | CD1B      | 910    | FALSE | 1.84(1.35-2.51) | 9E-05  | 0.002 | 0  |
| cg21602520 | BCL2      | 596    | TRUE  | 1.94(1.39-2.7)  | 0.0001 | 0.002 | 0  |
| cg04872689 | PLEK      | 5341   | FALSE | 0.52(0.37-0.72) | 0.0001 | 0.002 | 0  |
| cg16068833 | CD52      | 1043   | FALSE | 1.87(1.36-2.58) | 0.0001 | 0.002 | 0  |
| cg06183267 | AFF3      | 3899   | FALSE | 1.98(1.4-2.8)   | 0.0001 | 0.002 | 0  |
| cg13180098 | RHO       | 6010   | FALSE | 1.9(1.37-2.63)  | 0.0001 | 0.002 | 0  |
| cg07039362 | CEST      | 221223 | FALSE | 1.99(1.4-2.83)  | 0.0001 | 0.002 | 0  |
| cg19524009 | NEK3      | 4752   | FALSE | 0.54(0.39-0.74) | 0.0001 | 0.002 | 0  |
| cg01036779 | SH2D3A    | 10045  | TRUE  | 2.38(1.56-3.63) | 0.0001 | 0.002 | 0  |
| cg26482939 | GNA15     | 2769   | TRUE  | 0.5(0.35-0.71)  | 0.0001 | 0.002 | 0  |
| cg24320643 | ADAM17    | 6868   | TRUE  | 2.19(1.47-3.26) | 0.0001 | 0.002 | 0  |
| cg19210770 | ACCN4     | 55515  | TRUE  | 0.48(0.34-0.7)  | 0.0001 | 0.002 | 0  |
| cg17207590 | APH1B     | 83464  | TRUE  | 0.53(0.39-0.73) | 0.0001 | 0.002 | 0  |
| cg10453365 | RHCG      | 51458  | TRUE  | 0.52(0.37-0.72) | 0.0001 | 0.002 | 0  |
| cg24910675 | ENG       | 2022   | TRUE  | 0.49(0.34-0.7)  | 0.0001 | 0.002 | 0  |
| cg11476254 | LOC197322 | 197322 | TRUE  | 0.52(0.37-0.73) | 0.0001 | 0.002 | 0  |
| cg18493182 | LYPD2     | 137797 | FALSE | 1.94(1.39-2.7)  | 0.0001 | 0.002 | 0  |

SupplTable2.txt

|            |               |        |       |                 |        |       |    |
|------------|---------------|--------|-------|-----------------|--------|-------|----|
| cg04301614 | FLJ11017      | 55286  | FALSE | 0.4(0.25-0.63)  | 0.0001 | 0.002 | 0  |
| cg07314414 | SAP130        | 79595  | TRUE  | 2.32(1.51-3.56) | 0.0001 | 0.002 | 0  |
| cg05822532 | ELN           | 2006   | TRUE  | 0.49(0.34-0.7)  | 0.0001 | 0.002 | -1 |
| cg14182690 | RUNX3         | 864    | TRUE  | 2.05(1.42-2.97) | 0.0001 | 0.002 | 0  |
| cg24058132 | GALC          | 2581   | TRUE  | 1.85(1.36-2.51) | 0.0001 | 0.002 | 0  |
| cg15322932 | ALDH3B1       | 221    | FALSE | 0.5(0.35-0.71)  | 0.0001 | 0.002 | -1 |
| cg14188111 | S100A13       | 6284   | TRUE  | 1.97(1.39-2.78) | 0.0001 | 0.002 | 0  |
| cg07443748 | CESK1         | 150160 | FALSE | 1.96(1.39-2.76) | 0.0001 | 0.002 | 0  |
| cg09300114 | SLC16A5       | 9121   | TRUE  | 0.51(0.36-0.72) | 0.0001 | 0.002 | 0  |
| cg15937958 | UNQ473        | 284340 | FALSE | 0.54(0.39-0.74) | 0.0001 | 0.002 | 0  |
| cg02512860 | CLDN15        | 24146  | FALSE | 0.55(0.4-0.74)  | 0.0001 | 0.002 | 0  |
| cg10688991 | DLX3          | 1747   | TRUE  | 0.52(0.37-0.72) | 0.0001 | 0.002 | 0  |
| cg10787197 | C6orf105      | 84830  | FALSE | 0.54(0.39-0.74) | 0.0001 | 0.002 | 0  |
| cg12949760 | KCNQ1         | 3784   | TRUE  | 0.54(0.4-0.74)  | 0.0001 | 0.002 | -1 |
| cg04901273 | TBC1D3        | 84218  | FALSE | 2.05(1.42-2.95) | 0.0001 | 0.002 | 0  |
| cg07693270 | RPL39L        | 116832 | TRUE  | 1.82(1.34-2.48) | 0.0001 | 0.002 | 0  |
| cg15361231 | GILRX2        | 51022  | FALSE | 0.51(0.36-0.72) | 0.0001 | 0.003 | 0  |
| cg22932215 | COPSTB        | 64708  | TRUE  | 1.97(1.39-2.79) | 0.0001 | 0.003 | 0  |
| cg23338993 | UGT1A6        | 54578  | FALSE | 1.86(1.35-2.55) | 0.0001 | 0.003 | 0  |
| cg13060154 | DAB2IP        | 153090 | TRUE  | 0.53(0.38-0.73) | 0.0001 | 0.003 | 0  |
| cg07970007 | GBP1          | 2633   | FALSE | 1.86(1.35-2.56) | 0.0001 | 0.003 | 0  |
| cg14366598 | IL17E         | 64806  | FALSE | 1.91(1.37-2.66) | 0.0001 | 0.003 | 0  |
| cg05421688 | C1orf76       | 148753 | TRUE  | 0.51(0.36-0.72) | 0.0001 | 0.003 | 0  |
| cg16608348 | PTPN14        | 5784   | TRUE  | 0.51(0.36-0.72) | 0.0001 | 0.003 | 0  |
| cg03860768 | BLK           | 640    | FALSE | 1.97(1.39-2.8)  | 0.0001 | 0.003 | 0  |
| cg05666713 | DKFZp434B1231 | 91156  | FALSE | 1.99(1.4-2.82)  | 0.0001 | 0.003 | 0  |
| cg24678320 | FLJ38451      | 126375 | FALSE | 0.5(0.36-0.71)  | 0.0001 | 0.003 | 0  |

SuppTable2.txt

|             |           |        |       |                 |        |       |    |
|-------------|-----------|--------|-------|-----------------|--------|-------|----|
| cg10182321  | STK32B    | 55351  | TRUE  | 0.52(0.37-0.72) | 0.0001 | 0.003 | 0  |
| cg19635695  | PDE6C     | 5146   | FALSE | 1.94(1.38-2.73) | 0.0001 | 0.003 | 0  |
| cg15005385  | CCL3L1    | 6349   | FALSE | 1.93(1.38-2.7)  | 0.0001 | 0.003 | 0  |
| cg09018862  | SBP1      | 90198  | FALSE | 1.92(1.37-2.69) | 0.0001 | 0.003 | 0  |
| cg090606564 | MFAP4     | 4239   | FALSE | 0.51(0.36-0.73) | 0.0001 | 0.003 | 0  |
| cg20789824  | OLFML2A   | 169611 | FALSE | 0.55(0.4-0.75)  | 0.0001 | 0.003 | 0  |
| cg06105085  | C10orf104 | 119504 | TRUE  | 1.83(1.34-2.5)  | 0.0001 | 0.003 | 0  |
| cg01851399  | PKP2      | 5318   | TRUE  | 0.49(0.34-0.71) | 0.0001 | 0.003 | 0  |
| cg05715649  | SYT2      | 127833 | TRUE  | 0.53(0.39-0.74) | 0.0001 | 0.003 | 0  |
| cg13078388  | CIRBP     | 1153   | TRUE  | 1.97(1.42-2.75) | 0.0001 | 0.003 | 0  |
| cg14547335  | ATP2B2    | 491    | TRUE  | 1.91(1.37-2.67) | 0.0001 | 0.003 | 0  |
| cg02854288  | FHIT      | 2272   | TRUE  | 0.51(0.36-0.71) | 0.0001 | 0.003 | 0  |
| cg13625113  | ZNF482    | 10773  | TRUE  | 1.91(1.37-2.68) | 0.0001 | 0.003 | 0  |
| cg05718253  | LOC55908  | 55908  | FALSE | 0.52(0.38-0.73) | 0.0001 | 0.003 | 0  |
| cg07651914  | CLDN15    | 24146  | FALSE | 0.55(0.4-0.74)  | 0.0001 | 0.003 | 0  |
| cg04123507  | KRTHB6    | 3892   | TRUE  | 0.42(0.27-0.65) | 0.0001 | 0.003 | 0  |
| cg22165175  | KCNA2     | 3737   | TRUE  | 0.54(0.39-0.74) | 0.0001 | 0.003 | 0  |
| cg05102817  | RBM18     | 92400  | FALSE | 0.51(0.36-0.72) | 0.0001 | 0.003 | 0  |
| cg07220939  | SLC22A12  | 116085 | TRUE  | 0.54(0.39-0.74) | 0.0001 | 0.003 | 0  |
| cg09440340  | C1orf161  | 126868 | FALSE | 2.25(1.48-3.43) | 0.0001 | 0.003 | 0  |
| cg13530946  | IARS2     | 55699  | FALSE | 0.46(0.31-0.69) | 0.0001 | 0.003 | 0  |
| cg27235662  | CLDN16    | 10686  | FALSE | 1.83(1.34-2.51) | 0.0001 | 0.003 | 0  |
| cg27557796  | LY6G6C    | 80740  | FALSE | 2.04(1.43-2.89) | 0.0001 | 0.003 | 0  |
| cg07732037  | MPHOSPH9  | 10198  | FALSE | 1.86(1.35-2.57) | 0.0001 | 0.003 | 0  |
| cg03001305  | STAT5A    | 6776   | FALSE | 0.52(0.37-0.73) | 0.0001 | 0.003 | -1 |
| cg25282780  | AK3       | 50808  | TRUE  | 1.95(1.38-2.75) | 0.0001 | 0.003 | 0  |
| cg24408313  | BCL2      | 596    | TRUE  | 0.54(0.39-0.74) | 0.0001 | 0.003 | 0  |

SupplTable2.txt

|            |          |        |       |                 |        |       |   |
|------------|----------|--------|-------|-----------------|--------|-------|---|
| cg16280667 | BLR1     | 643    | TRUE  | 2.02(1.4-2.91)  | 0.0001 | 0.003 | 0 |
| cg24576425 | GALNT5   | 11227  | FALSE | 0.53(0.38-0.74) | 0.0001 | 0.003 | 0 |
| cg13382714 | AP4S1    | 11154  | TRUE  | 1.83(1.34-2.5)  | 0.0001 | 0.003 | 0 |
| cg12876594 | NPR2     | 4882   | TRUE  | 0.53(0.38-0.74) | 0.0001 | 0.003 | 0 |
| cg10599444 | MMP14    | 4323   | TRUE  | 0.52(0.37-0.73) | 0.0001 | 0.003 | 0 |
| cg25218351 | TRIM54   | 57159  | FALSE | 1.87(1.35-2.58) | 0.0001 | 0.003 | 0 |
| cg26842024 | KLF2     | 10365  | TRUE  | 1.86(1.35-2.57) | 0.0001 | 0.003 | 1 |
| cg05973262 | NOTCH4   | 4855   | FALSE | 0.53(0.38-0.74) | 0.0001 | 0.003 | 0 |
| cg25384595 | LILRA1   | 11024  | FALSE | 0.54(0.39-0.74) | 0.0001 | 0.003 | 0 |
| cg02601403 | TBC1D3C  | 414060 | FALSE | 1.95(1.38-2.75) | 0.0001 | 0.003 | 0 |
| cg01669948 | KCNK16   | 83795  | FALSE | 1.91(1.37-2.68) | 0.0001 | 0.003 | 0 |
| cg05130485 | CASP8    | 841    | FALSE | 2.01(1.4-2.89)  | 0.0001 | 0.003 | 0 |
| cg02196805 | CSF2     | 1437   | FALSE | 1.84(1.34-2.53) | 0.0001 | 0.003 | 0 |
| cg17918239 | ZNF281   | 23528  | FALSE | 2.01(1.4-2.89)  | 0.0001 | 0.003 | 0 |
| cg25242557 | PAX6     | 5080   | TRUE  | 0.51(0.36-0.72) | 0.0001 | 0.003 | 0 |
| cg04008901 | CACNA2D1 | 781    | TRUE  | 0.46(0.31-0.68) | 0.0001 | 0.003 | 0 |
| cg09195271 | RNF186   | 54546  | FALSE | 2.03(1.41-2.94) | 0.0001 | 0.003 | 1 |
| cg10905918 | RPS24    | 6229   | TRUE  | 1.91(1.37-2.68) | 0.0001 | 0.003 | 0 |
| cg17237063 | RBMS3    | 27303  | FALSE | 1.92(1.37-2.69) | 0.0001 | 0.003 | 0 |
| cg13828871 | MYST1    | 84148  | TRUE  | 2.04(1.42-2.94) | 0.0002 | 0.003 | 0 |
| cg24250393 | PRKCB1   | 5579   | TRUE  | 0.55(0.4-0.75)  | 0.0002 | 0.003 | 0 |
| cg02449608 | C19orf18 | 147685 | FALSE | 1.9(1.36-2.66)  | 0.0002 | 0.003 | 0 |
| cg09531892 | LRP12    | 29967  | TRUE  | 0.47(0.32-0.69) | 0.0002 | 0.003 | 0 |
| cg25866075 | NALP12   | 91662  | FALSE | 0.5(0.35-0.72)  | 0.0002 | 0.003 | 0 |
| cg27285720 | GBP4     | 115361 | FALSE | 2.33(1.5-3.64)  | 0.0002 | 0.003 | 0 |
| cg12578166 | KCNQ1    | 3784   | TRUE  | 1.84(1.34-2.52) | 0.0002 | 0.003 | 0 |
| cg12788313 | MST1     | 4485   | FALSE | 0.55(0.41-0.75) | 0.0002 | 0.003 | 0 |

SuppTable2.txt

|            |                |        |       |                 |        |       |    |
|------------|----------------|--------|-------|-----------------|--------|-------|----|
| cg18818531 | FOSL1          | 8061   | TRUE  | 1.86(1.35-2.56) | 0.0002 | 0.003 | 0  |
| cg26335299 | C16orf48       | 84080  | TRUE  | 0.53(0.38-0.74) | 0.0002 | 0.003 | 0  |
| cg15923513 | CD302          | 9936   | TRUE  | 0.53(0.39-0.74) | 0.0002 | 0.003 | 0  |
| cg18530324 | KIAA0427       | 9811   | TRUE  | 0.54(0.39-0.75) | 0.0002 | 0.003 | 0  |
| cg18669381 | ARHGEF19       | 128272 | FALSE | 1.87(1.35-2.59) | 0.0002 | 0.003 | 0  |
| cg04273431 | PRR3           | 80742  | TRUE  | 0.56(0.41-0.76) | 0.0002 | 0.003 | 0  |
| cg01309671 | RP3-473B4.1    | 159091 | TRUE  | 1.77(1.31-2.38) | 0.0002 | 0.003 | 0  |
| cg15426734 | PARDA6A        | 50855  | TRUE  | 0.52(0.37-0.73) | 0.0002 | 0.003 | 0  |
| cg02813121 | S100A12        | 6283   | FALSE | 1.94(1.37-2.75) | 0.0002 | 0.003 | 0  |
| cg05216141 | ETV7           | 51513  | TRUE  | 0.51(0.36-0.72) | 0.0002 | 0.003 | 0  |
| cg22140675 | G6PC3          | 92579  | TRUE  | 2.09(1.42-3.09) | 0.0002 | 0.003 | 0  |
| cg14298726 | DKFZP686A10121 | 85865  | TRUE  | 2(1.39-2.89)    | 0.0002 | 0.003 | 0  |
| cg06645778 | HSPC159        | 29094  | TRUE  | 0.54(0.39-0.74) | 0.0002 | 0.003 | 0  |
| cg14269477 | TRPV5          | 56302  | FALSE | 1.91(1.36-2.69) | 0.0002 | 0.003 | 0  |
| cg10523671 | SLC15A2        | 6565   | TRUE  | 0.51(0.36-0.73) | 0.0002 | 0.003 | 0  |
| cg08797194 | UGCGL2         | 55757  | TRUE  | 0.53(0.38-0.74) | 0.0002 | 0.003 | 0  |
| cg06785429 | DCUN1D1        | 54165  | FALSE | 1.77(1.31-2.4)  | 0.0002 | 0.003 | 0  |
| cg26306976 | ITGB1BP1       | 9270   | FALSE | 0.55(0.4-0.75)  | 0.0002 | 0.003 | 0  |
| cg05343453 | LOC136263      | 136263 | FALSE | 0.49(0.33-0.71) | 0.0002 | 0.003 | 0  |
| cg27588902 | GNMT           | 27232  | TRUE  | 0.56(0.41-0.76) | 0.0002 | 0.003 | 0  |
| cg15261665 | LTF            | 4057   | TRUE  | 0.56(0.41-0.76) | 0.0002 | 0.003 | 0  |
| cg10213812 | FOXN1          | 8456   | FALSE | 1.84(1.33-2.55) | 0.0002 | 0.003 | 0  |
| cg11719283 | ZNF574         | 64763  | FALSE | 0.52(0.37-0.73) | 0.0002 | 0.003 | 0  |
| cg07031996 | MTF1           | 4520   | TRUE  | 0.54(0.39-0.75) | 0.0002 | 0.003 | 0  |
| cg19764555 | AHNAK          | 79026  | TRUE  | 0.5(0.35-0.72)  | 0.0002 | 0.003 | -1 |
| cg06394229 | LGALS4         | 3960   | FALSE | 0.56(0.42-0.76) | 0.0002 | 0.003 | 0  |
| cg13931228 | MPP6           | 51678  | TRUE  | 0.53(0.38-0.74) | 0.0002 | 0.003 | -1 |

SuppTable2.txt

|            |           |        |       |                 |        |       |    |
|------------|-----------|--------|-------|-----------------|--------|-------|----|
| cg10645113 | LOC349236 | 349236 | FALSE | 1.99(1.39-2.86) | 0.0002 | 0.003 | 0  |
| cg10681065 | TFR2      | 7036   | FALSE | 0.56(0.42-0.76) | 0.0002 | 0.004 | -1 |
| cg23219570 | FGF23     | 8074   | FALSE | 0.53(0.38-0.74) | 0.0002 | 0.004 | 0  |
| cg18338293 | BBS1      | 582    | TRUE  | 0.53(0.39-0.74) | 0.0002 | 0.004 | 0  |
| cg15913671 | TMEM105   | 284186 | FALSE | 1.86(1.34-2.57) | 0.0002 | 0.004 | 0  |
| cg13739417 | IL8RB     | 3579   | FALSE | 0.43(0.28-0.67) | 0.0002 | 0.004 | 0  |
| cg12998614 | KISS1R    | 84634  | TRUE  | 0.54(0.4-0.75)  | 0.0002 | 0.004 | 0  |
| cg15484375 | SAA1      | 6288   | FALSE | 0.53(0.38-0.74) | 0.0002 | 0.004 | 0  |
| cg14722162 | C5orf20   | 140947 | FALSE | 1.94(1.37-2.76) | 0.0002 | 0.004 | 0  |
| cg03019000 | TEX264    | 51368  | FALSE | 1.85(1.34-2.57) | 0.0002 | 0.004 | 0  |
| cg21770617 | FAM3D     | 131177 | FALSE | 1.99(1.38-2.85) | 0.0002 | 0.004 | 0  |
| cg02345317 | NLGN3     | 54413  | TRUE  | 0.54(0.4-0.74)  | 0.0002 | 0.004 | 0  |
| cg01405107 | HOXB5     | 3215   | TRUE  | 0.55(0.4-0.76)  | 0.0002 | 0.004 | -1 |
| cg22585269 | CHEK2     | 11200  | TRUE  | 1.9(1.35-2.66)  | 0.0002 | 0.004 | 0  |
| cg04870470 | EXTL2     | 2135   | FALSE | 0.55(0.4-0.76)  | 0.0002 | 0.004 | 0  |
| cg06244417 | FCN1      | 2219   | FALSE | 0.54(0.39-0.75) | 0.0002 | 0.004 | 0  |
| cg15659828 | CHID1     | 66005  | TRUE  | 0.53(0.38-0.74) | 0.0002 | 0.004 | 0  |
| cg06310844 | PDCD5     | 9141   | TRUE  | 2.06(1.41-3.02) | 0.0002 | 0.004 | 0  |
| cg11804789 | CST7      | 8530   | FALSE | 1.84(1.34-2.54) | 0.0002 | 0.004 | 0  |
| cg22268164 | TRHR      | 7201   | FALSE | 1.8(1.32-2.45)  | 0.0002 | 0.004 | 0  |
| cg05890019 | WDFY3     | 23001  | TRUE  | 0.49(0.34-0.72) | 0.0002 | 0.004 | 0  |
| cg14321743 | PLA2G2D   | 26279  | FALSE | 1.84(1.33-2.54) | 0.0002 | 0.004 | 0  |
| cg04126866 | C10orf99  | 387695 | FALSE | 1.9(1.35-2.68)  | 0.0002 | 0.004 | 0  |
| cg21182407 | BPHL      | 670    | TRUE  | 0.51(0.35-0.73) | 0.0002 | 0.004 | -1 |
| cg10451565 | GPR77     | 27202  | FALSE | 0.54(0.38-0.75) | 0.0002 | 0.004 | 0  |
| cg13435381 | LGR5      | 8549   | TRUE  | 0.53(0.38-0.74) | 0.0002 | 0.004 | 0  |
| cg06200697 | CTNND1    | 1500   | FALSE | 0.56(0.41-0.76) | 0.0002 | 0.004 | 0  |

## SuppTable2.txt

|            |           |        |       |                 |        |       |   |
|------------|-----------|--------|-------|-----------------|--------|-------|---|
| cg10922280 | DPEP2     | 64174  | FALSE | 1.82(1.32-2.49) | 0.0002 | 0.004 | 0 |
| cg14823162 | POU3F2    | 5454   | TRUE  | 0.51(0.36-0.73) | 0.0002 | 0.004 | 0 |
| cg23732182 | C21orf84  | 114038 | FALSE | 0.55(0.4-0.75)  | 0.0002 | 0.004 | 0 |
| cg07510080 | HIF1AN    | 55662  | TRUE  | 1.93(1.36-2.74) | 0.0002 | 0.004 | 0 |
| cg20879959 | HLA-A     | 3105   | TRUE  | 0.54(0.39-0.75) | 0.0002 | 0.004 | 0 |
| cg13669740 | VSIG9     | 201633 | FALSE | 1.91(1.35-2.69) | 0.0002 | 0.004 | 0 |
| cg10533434 | SERPINB3  | 6317   | FALSE | 0.56(0.41-0.76) | 0.0002 | 0.004 | 0 |
| cg11435943 | SERPINB12 | 89777  | FALSE | 1.88(1.35-2.61) | 0.0002 | 0.004 | 0 |
| cg02417408 | PPM1M     | 132160 | FALSE | 1.86(1.34-2.59) | 0.0002 | 0.004 | 0 |
| cg06285340 | CYP11A1   | 1583   | FALSE | 1.87(1.34-2.62) | 0.0002 | 0.004 | 0 |
| cg12582959 | HSU79303  | 29903  | TRUE  | 0.54(0.39-0.75) | 0.0002 | 0.004 | 0 |
| cg02332525 | GRM7      | 2917   | TRUE  | 0.55(0.4-0.75)  | 0.0002 | 0.004 | 0 |
| cg15775914 | CHML      | 1122   | FALSE | 1.85(1.33-2.58) | 0.0002 | 0.004 | 1 |
| cg00840516 | HYAL2     | 8692   | FALSE | 0.56(0.42-0.77) | 0.0002 | 0.004 | 0 |
| cg24588599 | C12orf24  | 29902  | TRUE  | 1.83(1.33-2.51) | 0.0002 | 0.004 | 0 |
| cg21671476 | MYL9      | 10398  | TRUE  | 0.55(0.4-0.76)  | 0.0002 | 0.004 | 0 |
| cg18485955 | TNFRSF17  | 608    | FALSE | 0.54(0.39-0.75) | 0.0002 | 0.004 | 0 |
| cg13929328 | FLJ46831  | 399823 | TRUE  | 0.54(0.39-0.74) | 0.0002 | 0.004 | 0 |
| cg01593886 | COL1A1    | 1277   | TRUE  | 0.53(0.38-0.75) | 0.0002 | 0.004 | 0 |
| cg20126106 | TAGLN3    | 29114  | TRUE  | 0.54(0.39-0.75) | 0.0002 | 0.004 | 0 |
| cg08611714 | KRTHA2    | 3882   | FALSE | 1.81(1.32-2.45) | 0.0002 | 0.004 | 0 |
| cg21949305 | ADORA2A   | 135    | FALSE | 0.55(0.4-0.76)  | 0.0002 | 0.004 | 0 |
| cg15526708 | TGFBF1    | 7046   | TRUE  | 0.55(0.39-0.76) | 0.0002 | 0.004 | 0 |
| cg04541607 | CRYBB1    | 1414   | FALSE | 0.55(0.4-0.76)  | 0.0002 | 0.004 | 0 |
| cg02431964 | MARCO     | 8685   | FALSE | 0.48(0.33-0.71) | 0.0002 | 0.004 | 0 |
| cg21825364 | VCY       | 9084   | TRUE  | 0.51(0.36-0.73) | 0.0002 | 0.004 | 0 |
| cg12730381 | YWHAG     | 7532   | TRUE  | 1.96(1.39-2.77) | 0.0002 | 0.004 | 0 |

## SuppTable2.txt

|            |          |        |       |                 |        |       |    |
|------------|----------|--------|-------|-----------------|--------|-------|----|
| cg04138756 | SPRR3    | 6707   | FALSE | 1.95(1.37-2.78) | 0.0002 | 0.004 | 0  |
| cg15195412 | CX3CL1   | 6376   | FALSE | 0.53(0.38-0.75) | 0.0002 | 0.004 | -1 |
| cg14795968 | ACADL    | 33     | TRUE  | 0.55(0.4-0.75)  | 0.0002 | 0.004 | 0  |
| cg20557202 | SLC5A5   | 6528   | TRUE  | 0.52(0.37-0.74) | 0.0002 | 0.004 | 0  |
| cg04856043 | HS1BP3   | 64342  | TRUE  | 0.55(0.4-0.76)  | 0.0002 | 0.004 | 0  |
| cg05294455 | MYL4     | 4635   | FALSE | 1.87(1.34-2.61) | 0.0002 | 0.004 | 0  |
| cg13555684 | CTGLF1   | 119016 | FALSE | 0.53(0.38-0.75) | 0.0002 | 0.004 | 0  |
| cg14132995 | SLC35A2  | 7355   | TRUE  | 1.78(1.31-2.42) | 0.0002 | 0.004 | 0  |
| cg08603768 | WNT8A    | 7478   | FALSE | 1.88(1.35-2.63) | 0.0002 | 0.004 | 0  |
| cg15278948 | ZFAND2B  | 130617 | TRUE  | 1.82(1.32-2.51) | 0.0002 | 0.004 | 0  |
| cg21440587 | AIF1     | 199    | FALSE | 0.53(0.38-0.75) | 0.0002 | 0.004 | 0  |
| cg19005210 | TREML2   | 79865  | FALSE | 0.54(0.39-0.75) | 0.0002 | 0.004 | 0  |
| cg15853125 | TIAM1    | 7074   | TRUE  | 1.81(1.32-2.49) | 0.0002 | 0.004 | 0  |
| cg11025793 | STX10    | 8677   | TRUE  | 1.88(1.34-2.64) | 0.0002 | 0.004 | 0  |
| cg17250929 | S100A5   | 6276   | FALSE | 1.79(1.31-2.45) | 0.0002 | 0.004 | 0  |
| cg07435592 | DCBLD2   | 131566 | TRUE  | 0.55(0.4-0.76)  | 0.0002 | 0.004 | 0  |
| cg21697134 | FN3K     | 64122  | TRUE  | 0.55(0.4-0.76)  | 0.0002 | 0.004 | 0  |
| cg10784821 | COG6     | 51004  | FALSE | 0.39(0.23-0.64) | 0.0002 | 0.004 | 0  |
| cg26079320 | POGK     | 57645  | TRUE  | 0.5(0.34-0.73)  | 0.0002 | 0.004 | 0  |
| cg24134767 | HTR3A    | 3359   | FALSE | 1.86(1.33-2.59) | 0.0002 | 0.004 | 0  |
| cg24697031 | EVPL     | 2125   | FALSE | 0.56(0.41-0.77) | 0.0002 | 0.004 | -1 |
| cg20673481 | KCNK3    | 3790   | TRUE  | 0.53(0.38-0.74) | 0.0002 | 0.004 | 0  |
| cg06616245 | GLI1     | 2735   | FALSE | 1.83(1.32-2.55) | 0.0002 | 0.004 | 0  |
| cg02385474 | PCNXL2   | 80003  | FALSE | 1.83(1.32-2.53) | 0.0002 | 0.004 | 0  |
| cg12181621 | HIST1H3I | 8354   | TRUE  | 1.98(1.39-2.82) | 0.0002 | 0.004 | 0  |
| cg14436426 | OPRL1    | 4987   | FALSE | 0.56(0.41-0.77) | 0.0002 | 0.004 | -1 |
| cg01909245 | LSP1     | 4046   | FALSE | 1.79(1.31-2.44) | 0.0002 | 0.004 | 0  |

SuppTable2.txt

|            |          |        |       |                 |        |       |    |
|------------|----------|--------|-------|-----------------|--------|-------|----|
| cg09879797 | WSB2     | 55884  | TRUE  | 0.55(0.4-0.75)  | 0.0002 | 0.004 | 0  |
| cg04586023 | HDAC10   | 83933  | FALSE | 0.56(0.4-0.76)  | 0.0002 | 0.004 | 0  |
| cg04794268 | CYHR1    | 50626  | FALSE | 0.55(0.4-0.76)  | 0.0003 | 0.004 | -1 |
| cg20098659 | CLEC9A   | 283420 | TRUE  | 0.56(0.42-0.77) | 0.0003 | 0.004 | 0  |
| cg17264470 | FGF21    | 26291  | FALSE | 1.88(1.34-2.65) | 0.0003 | 0.004 | 0  |
| cg01063813 | STAT6    | 6778   | FALSE | 1.87(1.33-2.64) | 0.0003 | 0.004 | 0  |
| cg16112945 | ADAMTS13 | 11093  | FALSE | 1.88(1.34-2.64) | 0.0003 | 0.004 | 0  |
| cg00077457 | ZNF326   | 284695 | TRUE  | 0.53(0.38-0.75) | 0.0003 | 0.004 | 0  |
| cg19145398 | FKHL18   | 2307   | FALSE | 1.84(1.33-2.57) | 0.0003 | 0.004 | 0  |
| cg08005849 | HGF      | 3082   | FALSE | 0.51(0.36-0.74) | 0.0003 | 0.004 | 0  |
| cg20050826 | K6IRS2   | 140807 | TRUE  | 0.54(0.39-0.76) | 0.0003 | 0.004 | 0  |
| cg14870271 | LGALS3BP | 3959   | FALSE | 1.83(1.32-2.52) | 0.0003 | 0.005 | 0  |
| cg22598563 | P4HA2    | 8974   | TRUE  | 0.56(0.41-0.77) | 0.0003 | 0.005 | 0  |
| cg16545105 | CRHBP    | 1393   | FALSE | 0.56(0.41-0.77) | 0.0003 | 0.005 | 0  |
| cg23815306 | TRIP13   | 9319   | TRUE  | 0.52(0.37-0.74) | 0.0003 | 0.005 | 0  |
| cg00566759 | DSC2     | 1824   | TRUE  | 0.56(0.41-0.77) | 0.0003 | 0.005 | 0  |
| cg00095526 | CACNA1S  | 779    | FALSE | 0.55(0.4-0.76)  | 0.0003 | 0.005 | 0  |
| cg12739034 | PTGER3   | 5733   | TRUE  | 0.52(0.37-0.73) | 0.0003 | 0.005 | 0  |
| cg01723747 | C16orf34 | 90861  | TRUE  | 1.92(1.35-2.74) | 0.0003 | 0.005 | 0  |
| cg15057581 | PTPNS1   | 140885 | TRUE  | 0.52(0.37-0.74) | 0.0003 | 0.005 | 0  |
| cg23189044 | KCNE3    | 10008  | TRUE  | 0.54(0.38-0.75) | 0.0003 | 0.005 | 0  |
| cg24727203 | PPP1R3B  | 79660  | TRUE  | 0.55(0.4-0.76)  | 0.0003 | 0.005 | 0  |
| cg01130192 | ACO1     | 48     | TRUE  | 0.55(0.4-0.76)  | 0.0003 | 0.005 | 0  |
| cg15213605 | SF3B3    | 23450  | TRUE  | 1.92(1.35-2.74) | 0.0003 | 0.005 | 0  |
| cg23282674 | IL20     | 50604  | FALSE | 0.53(0.38-0.75) | 0.0003 | 0.005 | 0  |
| cg24240626 | REG3A    | 5068   | FALSE | 1.92(1.36-2.73) | 0.0003 | 0.005 | 0  |
| cg00717862 | DNAJB11  | 51726  | TRUE  | 1.87(1.34-2.61) | 0.0003 | 0.005 | 0  |

SupplTable2.txt

|            |          |        |       |                 |        |       |    |
|------------|----------|--------|-------|-----------------|--------|-------|----|
| cg24411312 | ST14     | 6768   | FALSE | 1.85(1.33-2.57) | 0.0003 | 0.005 | 0  |
| cg03251079 | HMGGA2   | 8091   | TRUE  | 0.42(0.26-0.66) | 0.0003 | 0.005 | 0  |
| cg03991326 | RPL7     | 6129   | TRUE  | 1.89(1.34-2.68) | 0.0003 | 0.005 | 0  |
| cg11879514 | SLC16A6  | 9120   | TRUE  | 1.9(1.34-2.69)  | 0.0003 | 0.005 | 0  |
| cg27207274 | MYC      | 4609   | TRUE  | 1.87(1.33-2.64) | 0.0003 | 0.005 | 0  |
| cg19337279 | MPL      | 4352   | FALSE | 0.56(0.41-0.77) | 0.0003 | 0.005 | 0  |
| cg04478795 | SMO      | 6608   | TRUE  | 0.52(0.37-0.74) | 0.0003 | 0.005 | 0  |
| cg21627181 | SLC17A4  | 10050  | FALSE | 1.81(1.31-2.5)  | 0.0003 | 0.005 | 0  |
| cg18081258 | NDRG2    | 57447  | TRUE  | 0.55(0.4-0.76)  | 0.0003 | 0.005 | -1 |
| cg11558474 | TMEM2    | 23670  | TRUE  | 1.98(1.36-2.87) | 0.0003 | 0.005 | 0  |
| cg01234133 | COL1A1   | 1277   | TRUE  | 0.46(0.3-0.71)  | 0.0003 | 0.005 | 0  |
| cg01646665 | TMEM79   | 84283  | FALSE | 1.77(1.3-2.42)  | 0.0003 | 0.005 | 0  |
| cg17118262 | CCL1     | 6346   | FALSE | 0.54(0.39-0.76) | 0.0003 | 0.005 | 0  |
| cg19391527 | PNOC     | 5368   | FALSE | 1.73(1.28-2.33) | 0.0003 | 0.005 | 0  |
| cg23917399 | TNFAIP8  | 25816  | TRUE  | 0.54(0.39-0.76) | 0.0003 | 0.005 | 0  |
| cg02672493 | TMEM22   | 80723  | TRUE  | 0.56(0.4-0.77)  | 0.0003 | 0.005 | 0  |
| cg21491308 | TEX101   | 83639  | FALSE | 0.57(0.41-0.77) | 0.0003 | 0.005 | 0  |
| cg20648149 | SYNE2    | 23224  | TRUE  | 0.57(0.42-0.77) | 0.0003 | 0.005 | 0  |
| cg00431050 | ELOVL3   | 83401  | TRUE  | 0.55(0.4-0.76)  | 0.0003 | 0.005 | 0  |
| cg27319898 | FLJ32110 | 219578 | TRUE  | 0.55(0.4-0.76)  | 0.0003 | 0.005 | 0  |
| cg16470760 | CD4      | 920    | FALSE | 1.79(1.3-2.47)  | 0.0003 | 0.005 | 0  |
| cg12910797 | HOXB3    | 3213   | TRUE  | 0.53(0.37-0.75) | 0.0003 | 0.005 | -1 |
| cg10559803 | RALGPS2  | 55103  | TRUE  | 0.55(0.4-0.77)  | 0.0003 | 0.005 | 0  |
| cg14170423 | RASGRP2  | 10235  | TRUE  | 0.51(0.35-0.74) | 0.0003 | 0.005 | 0  |
| cg06785822 | FLJ25102 | 348738 | FALSE | 0.55(0.39-0.76) | 0.0003 | 0.005 | 0  |
| cg07717632 | FLJ20245 | 54863  | TRUE  | 0.53(0.37-0.75) | 0.0003 | 0.005 | 0  |
| cg25511807 | MMP7     | 4316   | FALSE | 0.56(0.41-0.77) | 0.0003 | 0.005 | 0  |

SupplTable2.txt

|            |           |        |       |                 |        |       |    |
|------------|-----------|--------|-------|-----------------|--------|-------|----|
| cg04425624 | TNF       | 7124   | FALSE | 0.55(0.4-0.76)  | 0.0003 | 0.005 | -1 |
| cg22202141 | FCGR3A    | 2214   | FALSE | 2.05(1.4-3)     | 0.0003 | 0.005 | 0  |
| cg23807646 | SLC26A8   | 116369 | FALSE | 0.57(0.42-0.78) | 0.0003 | 0.005 | 0  |
| cg18139900 | ZNF140    | 7699   | TRUE  | 1.97(1.36-2.86) | 0.0003 | 0.005 | 0  |
| cg18787975 | CTSB      | 1508   | TRUE  | 0.55(0.4-0.77)  | 0.0003 | 0.005 | 0  |
| cg23813257 | IL32      | 9235   | FALSE | 1.78(1.3-2.44)  | 0.0003 | 0.005 | 0  |
| cg18034859 | MYLK2     | 85366  | FALSE | 0.55(0.39-0.76) | 0.0003 | 0.005 | 0  |
| cg21184174 | NGFB      | 4803   | TRUE  | 0.54(0.38-0.75) | 0.0003 | 0.005 | 0  |
| cg18119407 | CFLAR     | 8837   | TRUE  | 1.8(1.3-2.49)   | 0.0003 | 0.005 | 0  |
| cg19006008 | F2RL3     | 9002   | FALSE | 0.55(0.4-0.76)  | 0.0003 | 0.005 | 0  |
| cg21522797 | PLCG2     | 5336   | FALSE | 1.82(1.31-2.53) | 0.0003 | 0.005 | 0  |
| cg02712878 | FAIM      | 55179  | TRUE  | 0.58(0.43-0.78) | 0.0003 | 0.005 | 0  |
| cg26538442 | FLJ21736  | 79984  | FALSE | 1.94(1.35-2.8)  | 0.0003 | 0.005 | 0  |
| cg27634151 | GPR83     | 10888  | TRUE  | 0.47(0.31-0.7)  | 0.0003 | 0.005 | 0  |
| cg22995106 | COG4      | 25839  | TRUE  | 1.81(1.31-2.5)  | 0.0003 | 0.005 | 0  |
| cg12262564 | IQGAP3    | 128239 | TRUE  | 0.54(0.39-0.76) | 0.0003 | 0.005 | 0  |
| cg18107072 | CGI-38    | 51673  | TRUE  | 0.54(0.38-0.75) | 0.0003 | 0.005 | 0  |
| cg02719245 | DICER1    | 23405  | TRUE  | 2.04(1.38-3.01) | 0.0003 | 0.005 | 0  |
| cg11319389 | C20orf100 | 84969  | TRUE  | 1.82(1.31-2.53) | 0.0003 | 0.005 | 0  |
| cg16301617 | TMC6      | 11322  | FALSE | 1.85(1.32-2.6)  | 0.0003 | 0.005 | 0  |
| cg23306832 | KIAA0999  | 23387  | TRUE  | 1.87(1.32-2.65) | 0.0003 | 0.005 | 0  |
| cg18661868 | FES       | 2242   | FALSE | 0.56(0.4-0.77)  | 0.0003 | 0.005 | 0  |
| cg07267296 | HMBOX1    | 79618  | TRUE  | 0.54(0.38-0.76) | 0.0003 | 0.005 | 0  |
| cg21850069 | TRIM41    | 90933  | TRUE  | 1.77(1.3-2.42)  | 0.0003 | 0.005 | 0  |
| cg23571857 | BIRC4BP   | 54739  | FALSE | 0.58(0.43-0.78) | 0.0003 | 0.005 | 0  |
| cg10891879 | CASZ1     | 54897  | TRUE  | 1.78(1.3-2.44)  | 0.0003 | 0.005 | 0  |
| cg03218374 | ANGPT4    | 51378  | FALSE | 1.81(1.31-2.52) | 0.0003 | 0.005 | 0  |

## SuppTable2.txt

|            |           |        |       |                 |        |       |    |
|------------|-----------|--------|-------|-----------------|--------|-------|----|
| cg12091944 | BAR D1    | 580    | TRUE  | 1.91(1.33-2.74) | 0.0003 | 0.005 | 0  |
| cg13759328 | CDH13     | 1012   | TRUE  | 0.4(0.24-0.66)  | 0.0003 | 0.005 | 0  |
| cg17827767 | LRR C21   | 26103  | FALSE | 1.88(1.33-2.66) | 0.0003 | 0.005 | 0  |
| cg22967298 | PCNP      | 57092  | TRUE  | 1.89(1.33-2.68) | 0.0003 | 0.005 | 0  |
| cg22131691 | PDE1C     | 5137   | TRUE  | 0.57(0.42-0.77) | 0.0003 | 0.006 | 0  |
| cg03693099 | CEL       | 1056   | FALSE | 0.57(0.42-0.77) | 0.0003 | 0.006 | 0  |
| cg03439703 | PDE3B     | 5140   | TRUE  | 1.77(1.29-2.42) | 0.0003 | 0.006 | 0  |
| cg00987379 | ZNF395    | 55893  | TRUE  | 0.55(0.39-0.77) | 0.0003 | 0.006 | 0  |
| cg07973246 | SRGAP1    | 57522  | TRUE  | 0.53(0.37-0.75) | 0.0003 | 0.006 | 0  |
| cg12703269 | PSTPIP1   | 9051   | FALSE | 1.78(1.29-2.45) | 0.0003 | 0.006 | 0  |
| cg14380517 | BTG3      | 10950  | TRUE  | 0.56(0.4-0.77)  | 0.0004 | 0.006 | 0  |
| cg04726446 | MGC16372  | 92749  | TRUE  | 0.55(0.4-0.76)  | 0.0004 | 0.006 | 0  |
| cg17850932 | IL2       | 3558   | FALSE | 1.73(1.28-2.34) | 0.0004 | 0.006 | 0  |
| cg03460527 | F3        | 2152   | TRUE  | 0.54(0.38-0.75) | 0.0004 | 0.006 | 0  |
| cg10670077 | INSR      | 3643   | TRUE  | 0.54(0.38-0.76) | 0.0004 | 0.006 | 0  |
| cg16414852 | SUL T1B1  | 27284  | FALSE | 1.84(1.31-2.58) | 0.0004 | 0.006 | 0  |
| cg23231873 | USP32     | 84669  | TRUE  | 1.85(1.32-2.59) | 0.0004 | 0.006 | 0  |
| cg19372178 | TMEM16G   | 50636  | FALSE | 1.8(1.3-2.48)   | 0.0004 | 0.006 | 0  |
| cg08897388 | LAMA4     | 3910   | FALSE | 0.54(0.38-0.76) | 0.0004 | 0.006 | 0  |
| cg24793903 | SCRN2     | 90507  | TRUE  | 1.75(1.28-2.38) | 0.0004 | 0.006 | 0  |
| cg08552999 | ZNF644    | 84146  | TRUE  | 1.79(1.31-2.46) | 0.0004 | 0.006 | 0  |
| cg22436229 | PDIK1L    | 149420 | TRUE  | 0.54(0.38-0.76) | 0.0004 | 0.006 | -1 |
| cg22253036 | DDX6      | 1656   | TRUE  | 1.9(1.33-2.73)  | 0.0004 | 0.006 | 0  |
| cg19815589 | LOC220070 | 220070 | FALSE | 0.54(0.39-0.76) | 0.0004 | 0.006 | 0  |
| cg23320649 | C3orf18   | 51161  | FALSE | 0.58(0.43-0.79) | 0.0004 | 0.006 | -1 |
| cg02331561 | ABCA3     | 21     | TRUE  | 0.45(0.29-0.7)  | 0.0004 | 0.006 | 0  |
| cg10822172 | CREB5     | 9586   | FALSE | 0.58(0.42-0.78) | 0.0004 | 0.006 | -1 |

SuppTable2.txt

|            |          |        |       |                 |        |       |    |
|------------|----------|--------|-------|-----------------|--------|-------|----|
| cg01074640 | IFNA17   | 3451   | FALSE | 1.87(1.32-2.64) | 0.0004 | 0.006 | 0  |
| cg10624445 | CNGB1    | 1258   | FALSE | 1.87(1.32-2.64) | 0.0004 | 0.006 | 0  |
| cg00294382 | IL23A    | 51561  | FALSE | 1.98(1.35-2.89) | 0.0004 | 0.006 | 0  |
| cg07349094 | AFF3     | 3899   | TRUE  | 1.73(1.27-2.35) | 0.0004 | 0.006 | 0  |
| cg19356324 | SLC7A6OS | 84138  | TRUE  | 0.54(0.38-0.76) | 0.0004 | 0.006 | 0  |
| cg14600885 | MYOZ3    | 91977  | FALSE | 1.79(1.3-2.46)  | 0.0004 | 0.006 | 0  |
| cg21264055 | PRR3     | 80742  | TRUE  | 0.56(0.41-0.78) | 0.0004 | 0.006 | 0  |
| cg25687894 | ACLY     | 47     | TRUE  | 0.55(0.39-0.77) | 0.0004 | 0.006 | 0  |
| cg16545079 | PER1     | 5187   | TRUE  | 0.53(0.37-0.75) | 0.0004 | 0.006 | 0  |
| cg16725130 | MMMP19   | 4327   | FALSE | 0.57(0.42-0.78) | 0.0004 | 0.006 | 0  |
| cg08418332 | CCL19    | 6363   | FALSE | 0.59(0.44-0.79) | 0.0004 | 0.006 | 0  |
| cg00651216 | HSP90AB1 | 3326   | TRUE  | 0.54(0.38-0.76) | 0.0004 | 0.006 | -1 |
| cg21161070 | RACGAP1  | 29127  | TRUE  | 1.87(1.32-2.65) | 0.0004 | 0.006 | 0  |
| cg24926042 | KRTHB2   | 3888   | FALSE | 1.78(1.29-2.46) | 0.0004 | 0.006 | 0  |
| cg23978322 | FHL5     | 9457   | FALSE | 0.56(0.41-0.77) | 0.0004 | 0.006 | 0  |
| cg02810134 | TNNC2    | 7125   | FALSE | 1.82(1.31-2.54) | 0.0004 | 0.006 | 0  |
| cg00661485 | FOXJ1    | 2299   | TRUE  | 0.52(0.36-0.74) | 0.0004 | 0.006 | 0  |
| cg02415431 | IGLL1    | 3543   | FALSE | 0.56(0.4-0.78)  | 0.0004 | 0.006 | 0  |
| cg16008138 | RNF190   | 162333 | TRUE  | 1.91(1.33-2.73) | 0.0004 | 0.006 | 1  |
| cg23749046 | GPR61    | 83873  | FALSE | 1.84(1.31-2.59) | 0.0004 | 0.006 | 0  |
| cg20614736 | CCDC74B  | 91409  | FALSE | 0.51(0.35-0.74) | 0.0004 | 0.006 | 0  |
| cg05839235 | NPR3     | 4883   | TRUE  | 0.54(0.39-0.76) | 0.0004 | 0.006 | 0  |
| cg06187947 | GULP1    | 51454  | TRUE  | 0.54(0.38-0.76) | 0.0004 | 0.006 | 0  |
| cg14366490 | TXNL6    | 115861 | FALSE | 1.78(1.29-2.45) | 0.0004 | 0.006 | 0  |
| cg06557606 | ATP6V1H  | 51606  | TRUE  | 1.82(1.32-2.52) | 0.0004 | 0.006 | 0  |
| cg10506318 | mimitin  | 91942  | FALSE | 0.55(0.4-0.77)  | 0.0004 | 0.006 | 0  |
| cg27446185 | VTCN1    | 79679  | FALSE | 1.75(1.28-2.38) | 0.0004 | 0.006 | 0  |

## SupplTable2.txt

|            |         |        |       |                 |        |       |    |
|------------|---------|--------|-------|-----------------|--------|-------|----|
| cg07103493 | SLC27A6 | 28965  | TRUE  | 0.56(0.4-0.77)  | 0.0004 | 0.006 | 0  |
| cg13265003 | SLC37A1 | 54020  | FALSE | 0.58(0.43-0.78) | 0.0004 | 0.006 | 0  |
| cg06762858 | PILRA   | 29992  | FALSE | 0.57(0.42-0.78) | 0.0004 | 0.007 | 0  |
| cg19713460 | SYNGR1  | 9145   | TRUE  | 0.57(0.42-0.78) | 0.0004 | 0.007 | 0  |
| cg27360098 | ELN     | 2006   | TRUE  | 0.56(0.4-0.78)  | 0.0004 | 0.007 | -1 |
| cg20267005 | TYROBP  | 7305   | FALSE | 0.56(0.41-0.78) | 0.0004 | 0.007 | -1 |
| cg22418909 | SFRP1   | 6422   | TRUE  | 0.53(0.38-0.75) | 0.0004 | 0.007 | 1  |
| cg05800321 | LY6D    | 8581   | TRUE  | 1.75(1.28-2.4)  | 0.0004 | 0.007 | 0  |
| cg15686608 | DAB2IP  | 153090 | TRUE  | 0.53(0.37-0.75) | 0.0004 | 0.007 | 0  |
| cg12707233 | WNK3    | 65267  | TRUE  | 0.54(0.38-0.76) | 0.0004 | 0.007 | 0  |
| cg21301440 | CYGB    | 114757 | TRUE  | 0.56(0.4-0.77)  | 0.0004 | 0.007 | 0  |
| cg24334983 | ANXA11  | 311    | TRUE  | 1.83(1.3-2.57)  | 0.0004 | 0.007 | 0  |
| cg23460697 | UBN1    | 29855  | FALSE | 0.49(0.32-0.73) | 0.0004 | 0.007 | 0  |
| cg21494776 | ICAM4   | 3386   | TRUE  | 0.55(0.4-0.77)  | 0.0004 | 0.007 | 0  |
| cg23651356 | RGS17   | 26575  | TRUE  | 0.58(0.42-0.79) | 0.0004 | 0.007 | 0  |
| cg01663469 | C3orf15 | 89876  | FALSE | 0.56(0.4-0.77)  | 0.0004 | 0.007 | 0  |
| cg26309951 | MORFAL2 | 9643   | TRUE  | 1.78(1.28-2.46) | 0.0004 | 0.007 | 0  |
| cg15118503 | AHSA2   | 130872 | TRUE  | 1.84(1.31-2.57) | 0.0004 | 0.007 | 0  |
| cg03139377 | SLC6A12 | 6539   | FALSE | 0.58(0.42-0.79) | 0.0004 | 0.007 | 0  |
| cg00658007 | C1orf36 | 343035 | FALSE | 0.57(0.41-0.78) | 0.0004 | 0.007 | 0  |
| cg13585240 | ARIH2   | 10425  | FALSE | 1.82(1.3-2.56)  | 0.0004 | 0.007 | 0  |
| cg19038540 | EDG1    | 1901   | TRUE  | 1.81(1.29-2.52) | 0.0004 | 0.007 | 0  |
| cg12966875 | SLPI    | 6590   | FALSE | 0.57(0.41-0.78) | 0.0005 | 0.007 | 0  |
| cg22510943 | LMNB2   | 84823  | TRUE  | 1.77(1.28-2.45) | 0.0005 | 0.007 | 0  |
| cg05559445 | CDKN1C  | 1028   | TRUE  | 0.58(0.42-0.79) | 0.0005 | 0.007 | 0  |
| cg11102782 | ISYNA1  | 51477  | TRUE  | 0.56(0.4-0.78)  | 0.0005 | 0.007 | 0  |
| cg12954718 | USP6    | 9098   | FALSE | 1.75(1.28-2.41) | 0.0005 | 0.007 | 0  |

SuppTable2.txt

|            |            |        |       |                 |        |       |   |
|------------|------------|--------|-------|-----------------|--------|-------|---|
| cg21581873 | PLEKHA6    | 22874  | FALSE | 0.56(0.4-0.77)  | 0.0005 | 0.007 | 0 |
| cg01963696 | ELA2       | 1991   | TRUE  | 0.58(0.43-0.79) | 0.0005 | 0.007 | 0 |
| cg14885742 | IFITM3     | 10410  | TRUE  | 0.57(0.42-0.78) | 0.0005 | 0.007 | 0 |
| cg14841875 | ATP1A1     | 476    | TRUE  | 1.95(1.34-2.83) | 0.0005 | 0.007 | 0 |
| cg01124420 | EDAR       | 10913  | FALSE | 1.73(1.28-2.35) | 0.0005 | 0.007 | 0 |
| cg00815605 | ACOT2      | 10965  | TRUE  | 0.59(0.44-0.8)  | 0.0005 | 0.007 | 0 |
| cg09279263 | TADA3L     | 10474  | FALSE | 1.81(1.29-2.54) | 0.0005 | 0.007 | 0 |
| cg22988566 | WFDC10B    | 280664 | FALSE | 1.89(1.32-2.7)  | 0.0005 | 0.007 | 0 |
| cg23902550 | TIGD5      | 84948  | TRUE  | 0.57(0.42-0.78) | 0.0005 | 0.007 | 0 |
| cg24506604 | LOC144501  | 144501 | FALSE | 1.84(1.3-2.61)  | 0.0005 | 0.007 | 0 |
| cg07076342 | MEA1       | 4201   | TRUE  | 1.78(1.28-2.46) | 0.0005 | 0.007 | 0 |
| cg27067618 | CYP4F3     | 4051   | FALSE | 0.57(0.42-0.79) | 0.0005 | 0.007 | 0 |
| cg03167763 | UBXD3      | 127733 | TRUE  | 1.79(1.29-2.47) | 0.0005 | 0.007 | 0 |
| cg20557104 | B3GALT7    | 374907 | FALSE | 0.57(0.41-0.78) | 0.0005 | 0.007 | 0 |
| cg22241124 | CNGA3      | 1261   | FALSE | 1.74(1.27-2.37) | 0.0005 | 0.007 | 0 |
| cg18456149 | NAPB       | 63908  | FALSE | 1.79(1.29-2.48) | 0.0005 | 0.007 | 0 |
| cg14450506 | DDX56      | 54606  | TRUE  | 0.58(0.43-0.79) | 0.0005 | 0.007 | 0 |
| cg14386061 | DOK2       | 9046   | FALSE | 1.91(1.33-2.75) | 0.0005 | 0.007 | 0 |
| cg21366535 | RSHL2      | 83861  | FALSE | 2.03(1.37-3.01) | 0.0005 | 0.007 | 0 |
| cg02988947 | LIMD2      | 80774  | TRUE  | 1.71(1.26-2.32) | 0.0005 | 0.007 | 0 |
| cg22972055 | UNC84A     | 23353  | TRUE  | 1.72(1.26-2.34) | 0.0005 | 0.007 | 1 |
| cg13234848 | AUTS2      | 26053  | TRUE  | 1.77(1.28-2.44) | 0.0005 | 0.007 | 0 |
| cg06392241 | NUDT4      | 11163  | TRUE  | 0.55(0.4-0.78)  | 0.0005 | 0.007 | 0 |
| cg20795401 | ITGA6      | 3655   | TRUE  | 1.71(1.26-2.31) | 0.0005 | 0.007 | 0 |
| cg14154330 | ARRHGAP27  | 201176 | FALSE | 0.58(0.43-0.79) | 0.0005 | 0.007 | 0 |
| cg00346145 | RPL34      | 6164   | TRUE  | 1.8(1.3-2.51)   | 0.0005 | 0.007 | 0 |
| cg24887211 | C14orf166B | 145497 | FALSE | 1.82(1.3-2.54)  | 0.0005 | 0.007 | 0 |

SuppTable2.txt

|            |          |        |       |                 |        |       |    |
|------------|----------|--------|-------|-----------------|--------|-------|----|
| cg07548313 | CD1C     | 911    | FALSE | 1.81(1.29-2.55) | 0.0005 | 0.007 | 0  |
| cg12080675 | KIAA0676 | 23061  | TRUE  | 0.53(0.37-0.76) | 0.0005 | 0.007 | 0  |
| cg22933847 | MIRGPRF  | 219928 | FALSE | 0.57(0.41-0.79) | 0.0005 | 0.007 | -1 |
| cg24851490 | RMASE2   | 6036   | FALSE | 0.56(0.4-0.78)  | 0.0005 | 0.007 | 0  |
| cg08463061 | RND3     | 390    | TRUE  | 1.89(1.32-2.7)  | 0.0005 | 0.007 | 0  |
| cg08157579 | SERHL2   | 253190 | TRUE  | 1.86(1.32-2.62) | 0.0005 | 0.007 | 0  |
| cg01599709 | HBEGF    | 1839   | TRUE  | 0.56(0.4-0.78)  | 0.0005 | 0.007 | 0  |
| cg16652259 | DLX1     | 1745   | TRUE  | 0.54(0.39-0.76) | 0.0005 | 0.007 | 0  |
| cg23773532 | GPRC5D   | 55507  | FALSE | 1.78(1.28-2.47) | 0.0005 | 0.007 | 0  |
| cg24904765 | STAM2    | 10254  | TRUE  | 1.91(1.33-2.76) | 0.0005 | 0.007 | 0  |
| cg11058932 | TSGA13   | 114960 | FALSE | 0.59(0.44-0.8)  | 0.0005 | 0.007 | 0  |
| cg25697314 | IL26     | 55801  | FALSE | 1.77(1.28-2.45) | 0.0005 | 0.007 | 0  |
| cg01172899 | SLC16A14 | 151473 | FALSE | 0.57(0.41-0.79) | 0.0005 | 0.008 | 0  |
| cg09072120 | PRTFDC1  | 56952  | TRUE  | 0.55(0.4-0.78)  | 0.0005 | 0.008 | -1 |
| cg10833576 | ANKRA2   | 57763  | TRUE  | 1.81(1.3-2.51)  | 0.0005 | 0.008 | 0  |
| cg21418052 | B3GTL    | 145173 | TRUE  | 1.73(1.27-2.38) | 0.0005 | 0.008 | 0  |
| cg22181664 | CLCA1    | 1179   | FALSE | 1.83(1.31-2.57) | 0.0005 | 0.008 | 0  |
| cg02347487 | NALP14   | 338323 | FALSE | 1.73(1.26-2.38) | 0.0005 | 0.008 | 0  |
| cg21504918 | GPX3     | 2878   | TRUE  | 0.55(0.39-0.77) | 0.0005 | 0.008 | 0  |
| cg14023451 | GPLD1    | 2822   | FALSE | 0.59(0.44-0.8)  | 0.0005 | 0.008 | 0  |
| cg26985289 | CLSTN1   | 22883  | TRUE  | 0.57(0.41-0.78) | 0.0005 | 0.008 | 0  |
| cg16744741 | PRKG2    | 5593   | FALSE | 0.57(0.42-0.79) | 0.0005 | 0.008 | -1 |
| cg08729012 | CMTM6    | 54918  | TRUE  | 1.8(1.29-2.53)  | 0.0005 | 0.008 | 0  |
| cg21057494 | CLEC3B   | 7123   | FALSE | 1.77(1.29-2.44) | 0.0005 | 0.008 | 0  |
| cg16540259 | NDST2    | 8509   | TRUE  | 0.59(0.44-0.8)  | 0.0005 | 0.008 | 0  |
| cg11959435 | IFNA1    | 3439   | FALSE | 1.75(1.27-2.4)  | 0.0005 | 0.008 | 0  |
| cg07671208 | BTN2A1   | 11120  | FALSE | 0.58(0.43-0.79) | 0.0005 | 0.008 | 0  |

SupplTable2.txt

|            |          |        |       |                 |        |       |   |
|------------|----------|--------|-------|-----------------|--------|-------|---|
| cg18528640 | MSTO1    | 55154  | TRUE  | 1.69(1.26-2.28) | 0.0005 | 0.008 | 0 |
| cg25697050 | INPP5D   | 3635   | FALSE | 0.53(0.37-0.76) | 0.0005 | 0.008 | 0 |
| cg21415698 | EXPH5    | 23086  | TRUE  | 1.76(1.27-2.43) | 0.0005 | 0.008 | 0 |
| cg12241297 | HNRPAD   | 10949  | TRUE  | 1.76(1.27-2.45) | 0.0005 | 0.008 | 0 |
| cg18992688 | AVPR1B   | 553    | TRUE  | 0.51(0.35-0.75) | 0.0005 | 0.008 | 0 |
| cg09674215 | TWIST1   | 7291   | TRUE  | 0.58(0.43-0.79) | 0.0005 | 0.008 | 0 |
| cg08731300 | FZD8     | 8325   | TRUE  | 0.55(0.39-0.77) | 0.0005 | 0.008 | 0 |
| cg15020645 | APC      | 324    | FALSE | 0.57(0.42-0.79) | 0.0005 | 0.008 | 0 |
| cg26540515 | ANGPT4   | 51378  | FALSE | 0.57(0.41-0.79) | 0.0006 | 0.008 | 0 |
| cg03822159 | SETD8    | 387893 | TRUE  | 0.59(0.43-0.8)  | 0.0006 | 0.008 | 0 |
| cg21892708 | PDI6     | 10130  | TRUE  | 0.5(0.33-0.75)  | 0.0006 | 0.008 | 0 |
| cg14306534 | ZBTB2    | 57621  | TRUE  | 1.82(1.3-2.54)  | 0.0006 | 0.008 | 0 |
| cg11635563 | PIG38    | 55068  | FALSE | 0.58(0.42-0.79) | 0.0006 | 0.008 | 0 |
| cg19798224 | C14orf68 | 283600 | FALSE | 1.74(1.27-2.38) | 0.0006 | 0.008 | 0 |
| cg15319451 | TMEM51   | 55092  | TRUE  | 0.51(0.35-0.75) | 0.0006 | 0.008 | 0 |
| cg19093820 | GPR156   | 165829 | FALSE | 1.78(1.29-2.47) | 0.0006 | 0.008 | 0 |
| cg01356829 | IL12RB2  | 3595   | TRUE  | 0.6(0.44-0.8)   | 0.0006 | 0.008 | 0 |
| cg14974772 | FBLN5    | 10516  | TRUE  | 0.57(0.41-0.78) | 0.0006 | 0.008 | 0 |
| cg01731685 | IL17R    | 23765  | TRUE  | 0.56(0.4-0.78)  | 0.0006 | 0.008 | 0 |
| cg21570220 | SLC11A2  | 4891   | TRUE  | 2.1(1.37-3.21)  | 0.0006 | 0.008 | 0 |
| cg11808757 | TUBGCP6  | 85378  | TRUE  | 1.77(1.27-2.46) | 0.0006 | 0.008 | 0 |
| cg15552238 | EMR3     | 84658  | FALSE | 0.6(0.45-0.81)  | 0.0006 | 0.008 | 0 |
| cg26331247 | FLJ33706 | 284805 | FALSE | 1.79(1.3-2.46)  | 0.0006 | 0.008 | 0 |
| cg27563778 | C4orf17  | 84103  | FALSE | 0.55(0.39-0.78) | 0.0006 | 0.008 | 0 |
| cg16142218 | CHMP7    | 91782  | FALSE | 1.84(1.3-2.61)  | 0.0006 | 0.008 | 0 |
| cg08804892 | TRAK1    | 22906  | FALSE | 1.79(1.28-2.49) | 0.0006 | 0.008 | 0 |
| cg27470554 | FCGR2A   | 2212   | FALSE | 0.56(0.41-0.78) | 0.0006 | 0.008 | 0 |

SupplTable2.txt

|            |            |        |       |                 |        |       |    |
|------------|------------|--------|-------|-----------------|--------|-------|----|
| cg04311964 | LYPD2      | 137797 | FALSE | 1.75(1.28-2.4)  | 0.0006 | 0.008 | 0  |
| cg26955850 | OXT        | 5020   | TRUE  | 0.55(0.39-0.78) | 0.0006 | 0.008 | 0  |
| cg19258882 | ERBB3      | 2065   | TRUE  | 0.57(0.41-0.79) | 0.0006 | 0.008 | -1 |
| cg21614231 | BAG1       | 573    | FALSE | 0.57(0.41-0.78) | 0.0006 | 0.008 | 0  |
| cg05678175 | TRIM28     | 10155  | TRUE  | 1.67(1.25-2.24) | 0.0006 | 0.008 | 0  |
| cg10644361 | MIPOL1     | 145282 | TRUE  | 0.52(0.36-0.76) | 0.0006 | 0.008 | 0  |
| cg11787522 | STRA6      | 64220  | FALSE | 1.75(1.27-2.39) | 0.0006 | 0.008 | 0  |
| cg17754680 | NPC1L1     | 29881  | FALSE | 1.77(1.27-2.46) | 0.0006 | 0.008 | 0  |
| cg08766742 | SLC25A19   | 60386  | TRUE  | 1.68(1.25-2.26) | 0.0006 | 0.008 | 0  |
| cg16749578 | NR2F6      | 2063   | FALSE | 0.57(0.41-0.78) | 0.0006 | 0.008 | 0  |
| cg11003133 | AIM2       | 9447   | FALSE | 1.72(1.26-2.35) | 0.0006 | 0.008 | 0  |
| cg04968426 | PPP1R14D   | 54866  | FALSE | 1.8(1.29-2.5)   | 0.0006 | 0.008 | 0  |
| cg09551916 | CFHR2      | 3080   | FALSE | 1.71(1.25-2.33) | 0.0006 | 0.008 | 0  |
| cg06334284 | PPAP2B     | 8613   | TRUE  | 0.56(0.4-0.78)  | 0.0006 | 0.008 | 0  |
| cg23663653 |            | 3500   | TRUE  | 1.82(1.29-2.57) | 0.0006 | 0.008 | 0  |
| cg13548361 | PSD        | 5662   | TRUE  | 0.54(0.38-0.77) | 0.0006 | 0.008 | 0  |
| cg15503752 | ST6GALNAC1 | 55808  | FALSE | 1.71(1.25-2.34) | 0.0006 | 0.008 | 0  |
| cg08411049 | SERPINB5   | 5268   | TRUE  | 1.9(1.32-2.75)  | 0.0006 | 0.008 | 0  |
| cg26220350 | PLTP       | 5360   | TRUE  | 0.57(0.41-0.78) | 0.0006 | 0.008 | 0  |
| cg24659201 | GPR39      | 2863   | TRUE  | 0.58(0.42-0.79) | 0.0006 | 0.009 | 0  |
| cg13962355 | BTRC       | 8945   | TRUE  | 1.88(1.31-2.71) | 0.0006 | 0.009 | 0  |
| cg18370227 | KRTHA3A    | 3883   | FALSE | 0.56(0.4-0.78)  | 0.0006 | 0.009 | 0  |
| cg05279864 | ABCB4      | 5244   | FALSE | 1.73(1.26-2.38) | 0.0006 | 0.009 | 0  |
| cg06462291 | NT5DC3     | 51559  | FALSE | 0.55(0.39-0.77) | 0.0006 | 0.009 | 0  |
| cg06117855 | CLEC3B     | 7123   | FALSE | 0.57(0.41-0.79) | 0.0006 | 0.009 | 0  |
| cg25764570 | HLA-DRA    | 3122   | FALSE | 0.6(0.45-0.8)   | 0.0006 | 0.009 | 0  |
| cg03602500 | FLJ00060   | 90011  | TRUE  | 1.72(1.25-2.37) | 0.0006 | 0.009 | 1  |

SuppTable2.txt

|             |            |        |       |                 |        |       |    |
|-------------|------------|--------|-------|-----------------|--------|-------|----|
| cg01830294  | WNT2       | 7472   | TRUE  | 0.56(0.41-0.78) | 0.0006 | 0.009 | 0  |
| cg068836736 | ME1        | 4199   | TRUE  | 0.5(0.34-0.74)  | 0.0006 | 0.009 | 0  |
| cg01305421  | IGF1       | 3479   | FALSE | 0.57(0.41-0.79) | 0.0006 | 0.009 | 0  |
| cg12006284  | WT1        | 7490   | TRUE  | 1.69(1.25-2.28) | 0.0006 | 0.009 | 0  |
| cg01997953  | CXorf21    | 80231  | FALSE | 1.99(1.34-2.96) | 0.0006 | 0.009 | 0  |
| cg20496643  | RASL10B    | 91608  | TRUE  | 0.59(0.44-0.8)  | 0.0006 | 0.009 | 0  |
| cg06888782  | KCNQ4      | 9132   | TRUE  | 0.59(0.43-0.8)  | 0.0007 | 0.009 | -1 |
| cg05330360  | ZPBP2      | 124626 | TRUE  | 1.69(1.24-2.29) | 0.0007 | 0.009 | 1  |
| cg20864636  | GARNL3     | 84253  | FALSE | 0.53(0.37-0.77) | 0.0007 | 0.009 | 0  |
| cg13015534  | ST6GALNAC1 | 55808  | FALSE | 1.71(1.25-2.34) | 0.0007 | 0.009 | 0  |
| cg12356261  | NES        | 10763  | TRUE  | 0.56(0.4-0.78)  | 0.0007 | 0.009 | 0  |
| cg03993463  | KCNJ15     | 3772   | FALSE | 1.85(1.29-2.65) | 0.0007 | 0.009 | 0  |
| cg14732540  | BRDT       | 676    | TRUE  | 1.69(1.25-2.3)  | 0.0007 | 0.009 | 0  |
| cg02479575  | C19orf30   | 284424 | TRUE  | 0.57(0.41-0.79) | 0.0007 | 0.009 | 0  |
| cg23988567  |            | 3502   | FALSE | 1.83(1.29-2.6)  | 0.0007 | 0.009 | 0  |
| cg25475171  | SV2B       | 9899   | TRUE  | 1.78(1.29-2.46) | 0.0007 | 0.009 | 0  |
| cg18089000  | GBGT1      | 26301  | FALSE | 0.58(0.42-0.8)  | 0.0007 | 0.009 | 0  |
| cg06207804  | ARTN       | 9048   | TRUE  | 0.58(0.42-0.79) | 0.0007 | 0.009 | 0  |
| cg03972838  | FLJ20232   | 54471  | TRUE  | 0.57(0.41-0.79) | 0.0007 | 0.009 | -1 |
| cg05275231  | SLC25A32   | 81034  | TRUE  | 1.8(1.28-2.54)  | 0.0007 | 0.009 | 0  |
| cg02862362  | ARG1       | 383    | FALSE | 0.59(0.43-0.8)  | 0.0007 | 0.009 | 0  |
| cg24092253  | YTHDF1     | 54915  | TRUE  | 0.58(0.43-0.8)  | 0.0007 | 0.009 | -1 |
| cg10307548  | SOD3       | 6649   | FALSE | 0.58(0.42-0.8)  | 0.0007 | 0.009 | -1 |
| cg13085976  | FLJ20245   | 54863  | FALSE | 0.57(0.42-0.79) | 0.0007 | 0.009 | 0  |
| cg16983211  | HOXC5      | 3222   | TRUE  | 1.72(1.25-2.36) | 0.0007 | 0.009 | 0  |
| cg25421002  | MMAA       | 166785 | TRUE  | 1.69(1.24-2.3)  | 0.0007 | 0.009 | 1  |
| cg19046959  | COL8A2     | 1296   | FALSE | 0.55(0.39-0.78) | 0.0007 | 0.009 | 0  |

SupplTable2.txt

|            |          |        |       |                 |        |       |    |
|------------|----------|--------|-------|-----------------|--------|-------|----|
| cg12391921 | ITGB1BP2 | 26548  | FALSE | 0.58(0.43-0.8)  | 0.0007 | 0.009 | 0  |
| cg12240237 | WBSCR23  | 80112  | FALSE | 1.77(1.27-2.48) | 0.0007 | 0.009 | 0  |
| cg15774495 | GRB10    | 2887   | TRUE  | 0.56(0.4-0.79)  | 0.0007 | 0.009 | 0  |
| cg18627308 | FLJ10661 | 55199  | TRUE  | 0.57(0.41-0.79) | 0.0007 | 0.009 | 0  |
| cg26790059 | MGC27121 | 408263 | FALSE | 1.79(1.28-2.51) | 0.0007 | 0.01  | 0  |
| cg15032239 | CYFIP1   | 23191  | TRUE  | 0.59(0.43-0.81) | 0.0007 | 0.01  | 0  |
| cg09207718 | CYP1A2   | 1544   | FALSE | 1.91(1.31-2.79) | 0.0007 | 0.01  | 0  |
| cg16927136 | RPL35A   | 6165   | TRUE  | 1.7(1.25-2.32)  | 0.0007 | 0.01  | 0  |
| cg01414934 | SH3BGR13 | 83442  | FALSE | 0.55(0.39-0.78) | 0.0007 | 0.01  | 0  |
| cg13473383 | ZDHHC5   | 25921  | TRUE  | 0.55(0.39-0.79) | 0.0007 | 0.01  | -1 |
| cg01377755 | ACP6     | 51205  | TRUE  | 0.58(0.42-0.8)  | 0.0007 | 0.01  | -1 |
| cg06238491 | LAIR1    | 3903   | FALSE | 0.55(0.39-0.78) | 0.0007 | 0.01  | 0  |
| cg01942127 | CACNA1D  | 776    | TRUE  | 0.56(0.4-0.78)  | 0.0007 | 0.01  | 0  |
| cg09581098 | SEPT6    | 23157  | TRUE  | 1.67(1.24-2.26) | 0.0007 | 0.01  | 0  |
| cg20938359 | SLC6A12  | 6539   | FALSE | 0.58(0.42-0.8)  | 0.0007 | 0.01  | -1 |
| cg27553955 | KCNQ3    | 170850 | TRUE  | 1.76(1.26-2.45) | 0.0007 | 0.01  | 1  |
| cg22917487 | CX3CR1   | 1524   | FALSE | 1.81(1.3-2.53)  | 0.0007 | 0.01  | 0  |
| cg14667273 | VMA1     | 64856  | TRUE  | 0.56(0.4-0.78)  | 0.0007 | 0.01  | 0  |
| cg18704047 | PART1    | 25859  | FALSE | 1.7(1.25-2.33)  | 0.0007 | 0.01  | 0  |
| cg18641050 | BLOC1S2  | 282991 | TRUE  | 2.05(1.34-3.13) | 0.0007 | 0.01  | 0  |
| cg26574610 | VPREB3   | 29802  | FALSE | 1.78(1.27-2.5)  | 0.0007 | 0.01  | 0  |
| cg24545967 | SH2D3C   | 10044  | FALSE | 2.16(1.4-3.33)  | 0.0008 | 0.01  | 0  |
| cg09095562 | GTF3C5   | 9328   | TRUE  | 0.59(0.43-0.8)  | 0.0008 | 0.01  | 0  |
| cg00888479 | SLC24A3  | 57419  | TRUE  | 0.58(0.43-0.8)  | 0.0008 | 0.01  | 0  |
| cg17215680 | SIGLEC10 | 89790  | FALSE | 0.59(0.43-0.8)  | 0.0008 | 0.01  | 0  |
| cg02266518 | MOSC1    | 64757  | TRUE  | 0.57(0.41-0.79) | 0.0008 | 0.01  | 0  |
| cg10409560 | FLJ23657 | 152816 | FALSE | 1.74(1.26-2.41) | 0.0008 | 0.01  | 0  |

SuppTable2.txt

|            |          |        |       |                 |        |      |    |
|------------|----------|--------|-------|-----------------|--------|------|----|
| cg09645888 | ME3      | 10873  | TRUE  | 0.54(0.37-0.77) | 0.0008 | 0.01 | 0  |
| cg06409153 | ABCA5    | 23461  | TRUE  | 1.81(1.28-2.56) | 0.0008 | 0.01 | 0  |
| cg17518962 | GALST4   | 79690  | FALSE | 0.59(0.43-0.8)  | 0.0008 | 0.01 | 0  |
| cg25488021 | EPB41L2  | 2037   | FALSE | 0.6(0.45-0.81)  | 0.0008 | 0.01 | 0  |
| cg16935609 | SRD5A1   | 6715   | FALSE | 0.6(0.44-0.81)  | 0.0008 | 0.01 | 0  |
| cg25268718 | PSME1    | 5720   | FALSE | 0.55(0.38-0.78) | 0.0008 | 0.01 | -1 |
| cg23841186 | SOAT2    | 8435   | FALSE | 0.6(0.44-0.81)  | 0.0008 | 0.01 | -1 |
| cg07052387 | HIF1A    | 3091   | TRUE  | 1.68(1.25-2.26) | 0.0008 | 0.01 | 0  |
| cg07389922 | C17orf81 | 23587  | FALSE | 0.52(0.35-0.76) | 0.0008 | 0.01 | 0  |
| cg21301148 | MYH6     | 4624   | FALSE | 1.68(1.24-2.25) | 0.0008 | 0.01 | 0  |
| cg04434339 | ST6GAL2  | 84620  | TRUE  | 0.53(0.37-0.77) | 0.0008 | 0.01 | 0  |
| cg13802966 | CASP1    | 834    | FALSE | 1.7(1.25-2.32)  | 0.0008 | 0.01 | 0  |
| cg08567916 | SPRYD3   | 84926  | TRUE  | 1.69(1.24-2.29) | 0.0008 | 0.01 | 0  |
| cg05546044 | MAPK1    | 5594   | TRUE  | 2.08(1.36-3.17) | 0.0008 | 0.01 | 0  |
| cg26024843 | COL5A1   | 1289   | TRUE  | 0.41(0.24-0.69) | 0.0008 | 0.01 | 0  |
| cg22511947 | FN1      | 2335   | TRUE  | 1.77(1.26-2.48) | 0.0008 | 0.01 | 0  |
| cg17819635 | TCTEX1D1 | 200132 | TRUE  | 0.57(0.41-0.79) | 0.0008 | 0.01 | 0  |
| cg03791917 | BTK      | 695    | FALSE | 0.55(0.39-0.79) | 0.0008 | 0.01 | 0  |
| cg06000781 | BST1     | 683    | TRUE  | 0.57(0.41-0.79) | 0.0008 | 0.01 | 0  |
| cg08388746 | C1orf83  | 127428 | TRUE  | 1.71(1.24-2.34) | 0.0008 | 0.01 | 0  |
| cg11161417 | SPACA3   | 124912 | FALSE | 1.68(1.24-2.28) | 0.0008 | 0.01 | 0  |
| cg24024214 | BTNL8    | 79908  | TRUE  | 2(1.33-3)       | 0.0008 | 0.01 | 0  |
| cg03746685 | TMEM126B | 55863  | FALSE | 1.8(1.27-2.56)  | 0.0008 | 0.01 | 0  |
| cg23756272 | BCL2     | 596    | TRUE  | 0.6(0.44-0.81)  | 0.0008 | 0.01 | 0  |
| cg02873524 | PAPPA    | 5069   | TRUE  | 0.51(0.35-0.75) | 0.0008 | 0.01 | 0  |
| cg16670497 | GSTM2    | 2946   | TRUE  | 0.58(0.42-0.8)  | 0.0008 | 0.01 | 0  |
| cg20339230 | STR8JA2  | 8128   | TRUE  | 0.56(0.4-0.78)  | 0.0008 | 0.01 | 0  |

SuppTable2.txt

|            |              |        |       |                 |        |      |    |
|------------|--------------|--------|-------|-----------------|--------|------|----|
| cg23743472 | C11orf38     | 399967 | FALSE | 0.48(0.31-0.74) | 0.0008 | 0.01 | 0  |
| cg13383490 | TSG101       | 7251   | TRUE  | 1.67(1.23-2.26) | 0.0008 | 0.01 | 0  |
| cg13151102 | KCNU4        | 3761   | TRUE  | 1.84(1.28-2.64) | 0.0008 | 0.01 | 0  |
| cg22443330 | KIAA1018     | 22909  | FALSE | 0.57(0.41-0.79) | 0.0008 | 0.01 | 0  |
| cg12575181 | PIGH         | 5283   | TRUE  | 0.52(0.35-0.77) | 0.0008 | 0.01 | 0  |
| cg11504897 | NRN1         | 51299  | TRUE  | 1.72(1.25-2.37) | 0.0008 | 0.01 | 0  |
| cg21226225 | TXNRD1       | 7296   | TRUE  | 1.85(1.28-2.68) | 0.0008 | 0.01 | 0  |
| cg13265789 | UNC5C        | 8633   | TRUE  | 0.54(0.38-0.77) | 0.0008 | 0.01 | 0  |
| cg11260422 | FOXA1        | 3169   | TRUE  | 0.42(0.25-0.69) | 0.0008 | 0.01 | 0  |
| cg20675440 | COG8         | 84342  | FALSE | 0.59(0.44-0.8)  | 0.0008 | 0.01 | 0  |
| cg03469054 | KIAA1944     | 121256 | TRUE  | 0.57(0.42-0.79) | 0.0008 | 0.01 | 0  |
| cg08612871 | GJB5         | 2709   | FALSE | 1.74(1.25-2.43) | 0.0008 | 0.01 | 0  |
| cg00459975 | HMBOX1       | 79618  | TRUE  | 0.59(0.43-0.8)  | 0.0008 | 0.01 | 0  |
| cg12347740 | MGC34647     | 146433 | TRUE  | 0.57(0.4-0.79)  | 0.0008 | 0.01 | 0  |
| cg18508125 | FBXO16       | 157574 | FALSE | 1.68(1.24-2.28) | 0.0008 | 0.01 | 0  |
| cg09425611 | CES1         | 1066   | FALSE | 1.71(1.24-2.36) | 0.0008 | 0.01 | 0  |
| cg05484458 | GNB3         | 2784   | FALSE | 1.81(1.27-2.57) | 0.0009 | 0.01 | 0  |
| cg07288394 | C19orf12     | 83636  | TRUE  | 1.78(1.27-2.5)  | 0.0009 | 0.01 | 0  |
| cg17055734 | CRYGA        | 1418   | TRUE  | 0.57(0.41-0.8)  | 0.0009 | 0.01 | 0  |
| cg15297650 | DKFZP566N034 | 81615  | TRUE  | 0.58(0.42-0.8)  | 0.0009 | 0.01 | -1 |
| cg11227541 | GNG5         | 2787   | TRUE  | 1.68(1.23-2.3)  | 0.0009 | 0.01 | 0  |
| cg17910564 | VDAC3        | 7419   | TRUE  | 1.82(1.28-2.58) | 0.0009 | 0.01 | 0  |
| cg25485913 | NTF5         | 4909   | FALSE | 1.66(1.23-2.25) | 0.0009 | 0.01 | 0  |
| cg05869964 | C5orf13      | 9315   | FALSE | 0.58(0.42-0.8)  | 0.0009 | 0.01 | 0  |
| cg12431401 | FLJ45909     | 126432 | FALSE | 1.75(1.25-2.45) | 0.0009 | 0.01 | 0  |
| cg26087862 | ENSA         | 2029   | TRUE  | 1.82(1.28-2.58) | 0.0009 | 0.01 | 0  |
| cg24496666 | GIPPC2       | 54810  | TRUE  | 0.58(0.42-0.8)  | 0.0009 | 0.01 | 0  |

SuppTable2.txt

|            |               |        |       |                 |        |      |    |
|------------|---------------|--------|-------|-----------------|--------|------|----|
| cg15301694 | STRN3         | 29966  | TRUE  | 0.58(0.41-0.8)  | 0.0009 | 0.01 | 0  |
| cg08394377 | RIMS3         | 9783   | FALSE | 0.59(0.44-0.81) | 0.0009 | 0.01 | 0  |
| cg18623836 | RRM2          | 6241   | TRUE  | 1.68(1.23-2.28) | 0.0009 | 0.01 | 0  |
| cg27544190 | C21orf63      | 59271  | TRUE  | 0.55(0.39-0.79) | 0.0009 | 0.01 | -1 |
| cg23555120 | NUAK1         | 9891   | TRUE  | 0.57(0.41-0.79) | 0.0009 | 0.01 | 0  |
| cg03513363 | DUSP15        | 128853 | TRUE  | 0.58(0.42-0.8)  | 0.0009 | 0.01 | 0  |
| cg14440934 | ZDHC1         | 29800  | TRUE  | 1.76(1.25-2.46) | 0.0009 | 0.01 | 0  |
| cg21509097 | LYPLA3        | 23659  | TRUE  | 1.73(1.25-2.38) | 0.0009 | 0.01 | 0  |
| cg14313310 | GLT25D2       | 23127  | TRUE  | 0.58(0.42-0.81) | 0.0009 | 0.01 | 0  |
| cg22960284 | PYGL          | 5836   | TRUE  | 0.57(0.4-0.8)   | 0.0009 | 0.01 | 0  |
| cg20427865 | CX3CL1        | 6376   | FALSE | 0.54(0.38-0.78) | 0.0009 | 0.01 | 0  |
| cg17983307 | DKEFz434B1231 | 91156  | FALSE | 1.71(1.25-2.35) | 0.0009 | 0.01 | 0  |
| cg24919884 | ARHGEF16      | 27237  | FALSE | 1.74(1.26-2.42) | 0.0009 | 0.01 | 0  |
| cg23909633 | IL24          | 11009  | FALSE | 1.71(1.24-2.36) | 0.0009 | 0.01 | 0  |
| cg07115820 | EPX           | 8288   | FALSE | 1.7(1.24-2.33)  | 0.0009 | 0.01 | 0  |
| cg24459563 | CACNG1        | 786    | TRUE  | 0.54(0.37-0.78) | 0.0009 | 0.01 | 0  |
| cg27529628 | GAS2L3        | 283431 | TRUE  | 0.57(0.41-0.79) | 0.0009 | 0.01 | 0  |
| cg18042806 | MGC15875      | 85007  | TRUE  | 1.68(1.23-2.3)  | 0.0009 | 0.01 | 0  |
| cg19239342 | REEP5         | 7905   | TRUE  | 1.64(1.22-2.2)  | 0.0009 | 0.01 | 0  |
| cg19111262 | IGSF9         | 57549  | FALSE | 0.58(0.42-0.8)  | 0.0009 | 0.01 | -1 |
| cg08578641 | DNAI1         | 27019  | TRUE  | 0.57(0.41-0.8)  | 0.0009 | 0.01 | 0  |
| cg13519373 | IL8RA         | 3577   | FALSE | 1.83(1.28-2.62) | 0.0009 | 0.01 | 0  |
| cg17399166 | CD1D          | 912    | FALSE | 1.8(1.27-2.56)  | 0.0009 | 0.01 | 0  |
| cg27076812 | TM7SF3        | 51768  | TRUE  | 1.74(1.25-2.43) | 0.0009 | 0.01 | 0  |
| cg24784109 | HIST1H3D      | 8351   | TRUE  | 1.76(1.26-2.47) | 0.0009 | 0.01 | 0  |
| cg00754253 | HRASLS5       | 117245 | FALSE | 0.57(0.41-0.8)  | 0.0009 | 0.01 | 0  |
| cg15113803 | RHO           | 6010   | FALSE | 1.7(1.24-2.33)  | 0.0009 | 0.01 | 0  |

SupplTable2.txt

|            |                |        |       |                 |        |      |    |
|------------|----------------|--------|-------|-----------------|--------|------|----|
| cg17524886 | CHFR           | 55743  | TRUE  | 1.86(1.28-2.71) | 0.0009 | 0.01 | 1  |
| cg10523019 | RHBDD1         | 84236  | TRUE  | 1.7(1.23-2.34)  | 0.0009 | 0.01 | 1  |
| cg25117362 | C10orf77       | 79847  | TRUE  | 1.7(1.24-2.35)  | 0.001  | 0.01 | 0  |
| cg05501682 | DKFZp688615217 | 401232 | TRUE  | 0.57(0.4-0.8)   | 0.001  | 0.01 | -1 |
| cg12079362 | ATP6V0B        | 533    | TRUE  | 1.8(1.26-2.56)  | 0.001  | 0.01 | 0  |
| cg00955451 | APBA2          | 321    | FALSE | 1.71(1.24-2.36) | 0.001  | 0.01 | 0  |
| cg25894551 | FXYD2          | 486    | FALSE | 1.74(1.26-2.42) | 0.001  | 0.01 | 0  |
| cg26361928 | G3BP           | 10146  | TRUE  | 1.65(1.23-2.23) | 0.001  | 0.01 | 0  |
| cg03328804 | UVRAG          | 7405   | TRUE  | 1.76(1.26-2.47) | 0.001  | 0.01 | 0  |
| cg27524460 | PTGER1         | 5731   | FALSE | 1.7(1.24-2.34)  | 0.001  | 0.01 | 0  |
| cg20571908 | MPHOSPH1       | 9585   | TRUE  | 1.92(1.3-2.83)  | 0.001  | 0.01 | 0  |
| cg19388557 | GPR174         | 84636  | FALSE | 0.57(0.41-0.8)  | 0.001  | 0.01 | 0  |
| cg06417225 | PEBP1          | 5037   | FALSE | 1.77(1.26-2.47) | 0.001  | 0.01 | 0  |
| cg26164184 | FCN2           | 2220   | FALSE | 1.75(1.26-2.43) | 0.001  | 0.01 | 0  |
| cg22638542 | SEC22L3        | 9117   | FALSE | 0.57(0.41-0.8)  | 0.001  | 0.01 | 0  |
| cg15056412 | APBA2BP        | 63941  | TRUE  | 0.57(0.41-0.8)  | 0.001  | 0.01 | 0  |
| cg08659539 | ZFYVE19        | 84936  | FALSE | 0.55(0.38-0.79) | 0.001  | 0.01 | 0  |
| cg02806777 | PGLYRP1        | 8993   | TRUE  | 0.57(0.41-0.8)  | 0.001  | 0.01 | 0  |
| cg20530223 | KLHL5          | 51088  | TRUE  | 1.79(1.27-2.53) | 0.001  | 0.01 | 0  |
| cg21608489 | POU2F2         | 5452   | TRUE  | 1.69(1.24-2.3)  | 0.001  | 0.01 | 0  |
| cg18006568 | FLJ12056       | 79998  | TRUE  | 0.58(0.42-0.8)  | 0.001  | 0.01 | 0  |
| cg00237010 | NINJ2          | 4815   | FALSE | 1.68(1.23-2.3)  | 0.001  | 0.01 | 0  |
| cg05249393 | LDLR           | 3949   | TRUE  | 1.74(1.25-2.44) | 0.001  | 0.01 | 0  |
| cg19464016 | PRDM1          | 639    | TRUE  | 0.59(0.43-0.81) | 0.001  | 0.01 | 0  |
| cg03640944 | KIAA1754       | 85450  | FALSE | 1.97(1.32-2.93) | 0.001  | 0.01 | 0  |
| cg25635352 | B3GALT3        | 8706   | TRUE  | 0.57(0.41-0.8)  | 0.001  | 0.01 | 0  |
| cg09721427 | HHEX           | 3087   | TRUE  | 0.59(0.43-0.81) | 0.001  | 0.01 | 0  |

SuppTable2.txt

|            |          |        |       |                 |       |      |    |
|------------|----------|--------|-------|-----------------|-------|------|----|
| cg05616537 | TFDP1    | 7027   | TRUE  | 0.59(0.43-0.81) | 0.001 | 0.01 | -1 |
| cg26255848 | FBL      | 2091   | TRUE  | 1.81(1.27-2.58) | 0.001 | 0.01 | 0  |
| cg26754448 | C12orf57 | 113246 | TRUE  | 1.72(1.24-2.38) | 0.001 | 0.01 | 0  |
| cg25473396 | MPG      | 4350   | FALSE | 0.58(0.42-0.8)  | 0.001 | 0.01 | 0  |
| cg24214470 | SERPINF1 | 5176   | TRUE  | 0.59(0.43-0.8)  | 0.001 | 0.01 | 0  |
| cg19192120 | SSH3     | 54961  | TRUE  | 0.57(0.41-0.8)  | 0.001 | 0.01 | 0  |
| cg17468440 | PPP2R1B  | 5519   | TRUE  | 0.56(0.39-0.79) | 0.001 | 0.01 | 0  |
| cg26361780 | CPB1     | 1360   | FALSE | 0.51(0.34-0.77) | 0.001 | 0.01 | 0  |
| cg19759064 | PHKG1    | 5260   | FALSE | 0.56(0.4-0.8)   | 0.001 | 0.01 | -1 |
| cg16506346 | OR1E1    | 8387   | FALSE | 0.56(0.4-0.8)   | 0.001 | 0.01 | 0  |
| cg07136421 | GPR89A   | 51463  | TRUE  | 1.68(1.23-2.29) | 0.001 | 0.01 | 0  |
| cg08207256 | DNM2     | 1785   | TRUE  | 1.87(1.28-2.73) | 0.001 | 0.01 | 0  |
| cg10989326 | EVIS     | 7813   | FALSE | 1.77(1.26-2.48) | 0.001 | 0.01 | 0  |
| cg22598028 | ZNF660   | 285349 | TRUE  | 0.57(0.41-0.79) | 0.001 | 0.01 | 0  |
| cg21517055 | MGC11271 | 79173  | TRUE  | 1.64(1.22-2.22) | 0.001 | 0.01 | 0  |
| cg25488206 | RBM9     | 23543  | FALSE | 0.57(0.41-0.79) | 0.001 | 0.01 | 0  |
| cg10362591 | SLC6A2   | 6530   | TRUE  | 0.56(0.39-0.79) | 0.001 | 0.01 | 0  |
| cg25494064 | TMOD1    | 7111   | FALSE | 0.59(0.43-0.81) | 0.001 | 0.01 | 0  |
| cg00135056 | C3orf37  | 56941  | TRUE  | 0.55(0.38-0.79) | 0.001 | 0.01 | 0  |
| cg24993443 | SNRPN    | 6638   | TRUE  | 0.6(0.45-0.82)  | 0.001 | 0.01 | 0  |
| cg06917325 | SLC22A8  | 9376   | FALSE | 1.72(1.24-2.38) | 0.001 | 0.01 | 0  |
| cg20357806 | PPBP     | 5473   | FALSE | 1.66(1.22-2.26) | 0.001 | 0.01 | 0  |
| cg22552966 | FLJ31196 | 146802 | FALSE | 1.98(1.31-2.99) | 0.001 | 0.01 | 0  |
| cg03247626 | HINT3    | 135114 | TRUE  | 1.68(1.23-2.28) | 0.001 | 0.01 | 0  |
| cg05338167 | CALML4   | 91860  | FALSE | 0.59(0.44-0.81) | 0.001 | 0.01 | 0  |
| cg24959428 | GBP6     | 163351 | FALSE | 0.59(0.43-0.8)  | 0.001 | 0.01 | 0  |
| cg15439862 | DSC3     | 1825   | TRUE  | 0.59(0.44-0.81) | 0.001 | 0.01 | 0  |

SuppTable2.txt

|             |          |        |       |                 |       |      |   |
|-------------|----------|--------|-------|-----------------|-------|------|---|
| cg08007665  | KCNQ1    | 3784   | TRUE  | 1.7(1.23-2.34)  | 0.001 | 0.01 | 0 |
| cg22415472  | SLC5A7   | 60482  | FALSE | 1.69(1.23-2.32) | 0.001 | 0.01 | 0 |
| cg10090585  | COVA1    | 10495  | TRUE  | 1.72(1.23-2.39) | 0.001 | 0.01 | 0 |
| cg01369981  | CAMKK2   | 10645  | TRUE  | 0.56(0.39-0.79) | 0.001 | 0.01 | 0 |
| cg008992393 | MGC35212 | 264528 | FALSE | 1.79(1.26-2.52) | 0.001 | 0.01 | 0 |
| cg21731286  | TAS1R2   | 80834  | FALSE | 0.58(0.42-0.8)  | 0.001 | 0.01 | 0 |
| cg22794078  | C15orf44 | 81556  | TRUE  | 0.59(0.42-0.81) | 0.001 | 0.01 | 0 |
| cg17729941  | S100A13  | 6284   | TRUE  | 1.7(1.24-2.34)  | 0.001 | 0.01 | 0 |
| cg21621248  | LRR1M1   | 347730 | TRUE  | 0.59(0.43-0.81) | 0.001 | 0.01 | 0 |
| cg25021247  | AMT      | 275    | FALSE | 0.61(0.45-0.82) | 0.001 | 0.01 | 0 |
| cg21432842  | CSF3     | 1440   | FALSE | 0.59(0.43-0.81) | 0.001 | 0.01 | 0 |
| cg08624249  | KIAA0889 | 25781  | FALSE | 1.77(1.26-2.5)  | 0.001 | 0.01 | 0 |
| cg12936747  | RBP4     | 5950   | TRUE  | 0.58(0.42-0.81) | 0.001 | 0.01 | 0 |
| cg05261824  | ZNF165   | 7718   | FALSE | 0.61(0.45-0.82) | 0.001 | 0.01 | 0 |
| cg11884546  | ITGAX    | 3687   | FALSE | 0.58(0.42-0.81) | 0.001 | 0.01 | 0 |
| cg18055007  | DDAH2    | 23564  | TRUE  | 0.59(0.43-0.82) | 0.001 | 0.01 | 0 |
| cg10779183  | ELA3A    | 10136  | FALSE | 1.76(1.25-2.48) | 0.001 | 0.01 | 0 |
| cg11933267  | PLA2G2F  | 64600  | FALSE | 1.67(1.23-2.27) | 0.001 | 0.01 | 0 |
| cg10414058  | HDAC3    | 8841   | FALSE | 0.56(0.4-0.8)   | 0.001 | 0.01 | 0 |
| cg05606799  | KISS1    | 3814   | FALSE | 0.59(0.44-0.81) | 0.001 | 0.01 | 0 |
| cg08261094  | SFRP4    | 6424   | TRUE  | 0.57(0.4-0.8)   | 0.001 | 0.01 | 0 |
| cg15262516  | COL4A2   | 1284   | FALSE | 1.72(1.24-2.4)  | 0.001 | 0.01 | 0 |
| cg06131936  | OSBPL5   | 114879 | FALSE | 1.69(1.24-2.32) | 0.001 | 0.01 | 0 |
| cg18354594  | FLJ45717 | 388759 | FALSE | 0.58(0.42-0.8)  | 0.001 | 0.01 | 0 |
| cg02575859  | RPS4X    | 6191   | TRUE  | 1.81(1.27-2.57) | 0.001 | 0.01 | 0 |
| cg07942995  | ZSCAN1   | 284312 | TRUE  | 0.55(0.39-0.79) | 0.001 | 0.01 | 0 |
| cg20516209  | EMILIN1  | 11117  | FALSE | 0.57(0.41-0.8)  | 0.001 | 0.01 | 0 |

SupplTable2.txt

|            |           |        |       |                 |       |      |    |
|------------|-----------|--------|-------|-----------------|-------|------|----|
| cg02564523 | C7orf19   | 80228  | TRUE  | 1.61(1.2-2.16)  | 0.001 | 0.01 | 0  |
| cg15836722 | IL1B      | 3553   | FALSE | 0.59(0.43-0.82) | 0.001 | 0.01 | -1 |
| cg24471894 | KIAA0020  | 9933   | FALSE | 0.48(0.31-0.76) | 0.001 | 0.01 | 0  |
| cg27181079 | FLJ10292  | 55110  | TRUE  | 1.88(1.29-2.74) | 0.001 | 0.01 | 0  |
| cg15873633 | ZNF37A    | 7587   | TRUE  | 1.72(1.24-2.38) | 0.001 | 0.01 | 0  |
| cg17328659 | STUB1     | 10273  | TRUE  | 0.58(0.42-0.81) | 0.001 | 0.01 | 0  |
| cg11164347 | TRAPPC3   | 27095  | TRUE  | 1.71(1.23-2.38) | 0.001 | 0.01 | 0  |
| cg17651255 | SYF2      | 25949  | TRUE  | 1.81(1.26-2.57) | 0.001 | 0.01 | 0  |
| cg11700584 | RPL36AL   | 6166   | TRUE  | 1.69(1.23-2.33) | 0.001 | 0.01 | 0  |
| cg10964421 | TNFRSF10D | 8793   | TRUE  | 1.75(1.24-2.47) | 0.001 | 0.01 | 0  |
| cg15774283 | PTGS2     | 5743   | TRUE  | 0.58(0.42-0.8)  | 0.001 | 0.01 | 0  |
| cg23889021 | CTDSP1    | 58190  | TRUE  | 1.76(1.25-2.5)  | 0.001 | 0.01 | 0  |
| cg11970458 | PYCARD    | 29108  | TRUE  | 1.75(1.25-2.45) | 0.001 | 0.01 | 0  |
| cg16225429 | TUSC2     | 11334  | TRUE  | 1.88(1.28-2.76) | 0.001 | 0.01 | 0  |
| cg17699374 | MGC35206  | 339669 | FALSE | 0.56(0.39-0.79) | 0.001 | 0.01 | 0  |
| cg08747889 | PTK7      | 5754   | TRUE  | 0.6(0.44-0.82)  | 0.001 | 0.01 | 0  |
| cg01106788 | KIAA1632  | 57724  | FALSE | 0.57(0.41-0.81) | 0.001 | 0.01 | 0  |
| cg03686067 | C18orf14  | 79839  | FALSE | 1.68(1.23-2.31) | 0.001 | 0.01 | 0  |
| cg01607495 | BAG4      | 9530   | TRUE  | 0.58(0.42-0.81) | 0.001 | 0.01 | 0  |
| cg17421623 | C3orf9    | 56983  | FALSE | 0.61(0.45-0.83) | 0.001 | 0.01 | -1 |
| cg03533058 | NR4A1     | 3164   | FALSE | 1.69(1.22-2.33) | 0.001 | 0.01 | 0  |
| cg07141002 | H1FO      | 3005   | TRUE  | 0.62(0.46-0.83) | 0.001 | 0.01 | 0  |
| cg19729279 | PHF15     | 23338  | TRUE  | 1.66(1.22-2.27) | 0.001 | 0.01 | 0  |
| cg25372103 | DLL1      | 28514  | TRUE  | 1.78(1.26-2.51) | 0.001 | 0.01 | 0  |
| cg20125091 | GFI1      | 2672   | TRUE  | 0.6(0.43-0.82)  | 0.001 | 0.01 | 0  |
| cg09299388 | PGK2      | 5232   | FALSE | 1.72(1.24-2.39) | 0.001 | 0.01 | 0  |
| cg04042106 | MUS81     | 80198  | TRUE  | 0.58(0.42-0.81) | 0.001 | 0.01 | -1 |

SupplTable2.txt

|            |          |        |       |                 |       |      |   |
|------------|----------|--------|-------|-----------------|-------|------|---|
| cg00935364 | PKP3     | 11187  | TRUE  | 1.67(1.22-2.28) | 0.001 | 0.01 | 0 |
| cg09874776 | WFDC13   | 164237 | FALSE | 1.79(1.25-2.55) | 0.001 | 0.01 | 0 |
| cg19037167 | TLR2     | 7097   | TRUE  | 0.58(0.42-0.81) | 0.001 | 0.01 | 0 |
| cg24794531 | TRPC1    | 7220   | TRUE  | 0.58(0.42-0.81) | 0.001 | 0.01 | 0 |
| cg25040783 | APPL     | 26060  | TRUE  | 0.59(0.43-0.82) | 0.001 | 0.01 | 0 |
| cg00729275 | C18orf16 | 147429 | FALSE | 1.65(1.22-2.23) | 0.001 | 0.01 | 0 |
| cg26014796 | RNF39    | 80352  | TRUE  | 0.59(0.43-0.82) | 0.001 | 0.01 | 0 |
| cg16746462 | LNPEP    | 4012   | TRUE  | 1.65(1.21-2.26) | 0.001 | 0.01 | 0 |
| cg17964955 | RBP3     | 5949   | FALSE | 1.66(1.23-2.25) | 0.001 | 0.01 | 0 |
| cg26813908 | CCDC55   | 84081  | TRUE  | 1.7(1.22-2.35)  | 0.001 | 0.01 | 0 |
| cg15870225 | RNF41    | 10193  | TRUE  | 0.58(0.42-0.81) | 0.001 | 0.01 | 0 |
| cg03604278 | CIDEC    | 63924  | FALSE | 1.81(1.26-2.59) | 0.001 | 0.01 | 0 |
| cg12438034 | MAGEF1   | 64110  | TRUE  | 0.59(0.43-0.82) | 0.001 | 0.01 | 0 |
| cg20851245 | RNF25    | 64320  | FALSE | 0.59(0.43-0.82) | 0.001 | 0.01 | 0 |
| cg12400041 | DST      | 667    | TRUE  | 0.6(0.43-0.82)  | 0.001 | 0.01 | 0 |
| cg14400118 | MMP2     | 4313   | TRUE  | 0.59(0.43-0.82) | 0.001 | 0.01 | 0 |
| cg02831604 | ISL2     | 64843  | TRUE  | 0.57(0.4-0.81)  | 0.001 | 0.01 | 0 |
| cg16792800 | GPC6     | 10082  | TRUE  | 0.59(0.43-0.82) | 0.001 | 0.01 | 0 |
| cg13168820 | PTPR1    | 11122  | TRUE  | 0.58(0.42-0.8)  | 0.001 | 0.01 | 0 |
| cg09002774 | SLC35B1  | 10237  | TRUE  | 1.86(1.28-2.71) | 0.001 | 0.01 | 0 |
| cg12970008 | OSBPL5   | 114879 | TRUE  | 0.6(0.44-0.82)  | 0.001 | 0.01 | 0 |
| cg02549424 | AIFL     | 150209 | TRUE  | 1.75(1.24-2.45) | 0.001 | 0.01 | 0 |
| cg24641737 | DENND2D  | 79961  | FALSE | 0.58(0.42-0.81) | 0.001 | 0.01 | 0 |
| cg18448480 | FLJ35785 | 283796 | FALSE | 0.61(0.45-0.82) | 0.001 | 0.01 | 0 |
| cg27400772 | DPF1     | 8193   | TRUE  | 1.71(1.23-2.37) | 0.001 | 0.01 | 0 |
| cg12832649 | SPOCK    | 6695   | TRUE  | 0.56(0.39-0.79) | 0.001 | 0.01 | 0 |
| cg03699566 | FOLR1    | 2348   | FALSE | 1.79(1.25-2.57) | 0.001 | 0.01 | 0 |

SuppTable2.txt

|             |           |        |       |                 |       |      |    |
|-------------|-----------|--------|-------|-----------------|-------|------|----|
| cg022226939 | BLMH      | 642    | TRUE  | 0.59(0.42-0.81) | 0.001 | 0.01 | 0  |
| cg19801560  | HIST1H4G  | 8369   | TRUE  | 0.44(0.27-0.73) | 0.001 | 0.01 | 0  |
| cg26531804  | SPINT1    | 6692   | TRUE  | 0.6(0.44-0.82)  | 0.001 | 0.01 | 0  |
| cg08843314  | CXCR3     | 2833   | FALSE | 1.88(1.28-2.76) | 0.001 | 0.01 | 0  |
| cg21818252  | SEC24B    | 10427  | TRUE  | 0.59(0.42-0.82) | 0.001 | 0.01 | 0  |
| cg16218424  | CMAS      | 55907  | TRUE  | 1.7(1.22-2.36)  | 0.001 | 0.01 | 0  |
| cg04488521  | ZNF354C   | 30832  | TRUE  | 0.52(0.35-0.77) | 0.001 | 0.01 | 0  |
| cg00319692  | ATP6V0D2  | 245972 | FALSE | 0.58(0.42-0.81) | 0.001 | 0.01 | 0  |
| cg05949660  | MICAL1    | 64780  | TRUE  | 0.61(0.45-0.83) | 0.001 | 0.01 | -1 |
| cg20001829  | TMEM25    | 84866  | TRUE  | 0.54(0.38-0.79) | 0.001 | 0.01 | 0  |
| cg13313036  | SLC29A2   | 3177   | TRUE  | 1.67(1.22-2.29) | 0.001 | 0.01 | 0  |
| cg22161874  | TRPM6     | 140803 | FALSE | 0.61(0.46-0.83) | 0.001 | 0.02 | 0  |
| cg00563926  | TGFBFR3   | 7049   | TRUE  | 0.6(0.44-0.82)  | 0.001 | 0.02 | 0  |
| cg10978355  | CKMT2     | 1160   | TRUE  | 0.59(0.42-0.82) | 0.001 | 0.02 | 0  |
| cg15431576  | C10orf83  | 118812 | TRUE  | 1.76(1.24-2.5)  | 0.001 | 0.02 | 0  |
| cg25722142  | CITED2    | 10370  | TRUE  | 1.72(1.23-2.4)  | 0.001 | 0.02 | 0  |
| cg21035142  | CRYGN     | 155051 | TRUE  | 1.68(1.22-2.3)  | 0.001 | 0.02 | 0  |
| cg04631202  | MAN1C1    | 57134  | TRUE  | 0.6(0.44-0.83)  | 0.001 | 0.02 | -1 |
| cg18272264  | CACNB4    | 785    | TRUE  | 0.61(0.45-0.83) | 0.001 | 0.02 | 0  |
| cg26741595  | HIST1H2BD | 3017   | TRUE  | 1.73(1.23-2.43) | 0.001 | 0.02 | 0  |
| cg03973663  | LYN       | 4067   | TRUE  | 0.59(0.43-0.82) | 0.001 | 0.02 | 0  |
| cg18711066  | NFATC3    | 4775   | TRUE  | 1.67(1.21-2.29) | 0.001 | 0.02 | 0  |
| cg26320696  | PARVA     | 55742  | TRUE  | 0.55(0.38-0.79) | 0.001 | 0.02 | 0  |
| cg19282714  | PADI2     | 11240  | TRUE  | 0.59(0.43-0.81) | 0.001 | 0.02 | 0  |
| cg14407437  | FABP3     | 2170   | TRUE  | 0.58(0.42-0.81) | 0.001 | 0.02 | 0  |
| cg04809787  | CHRNB1    | 1140   | TRUE  | 0.61(0.45-0.83) | 0.001 | 0.02 | 0  |
| cg09584711  | HPR       | 3250   | FALSE | 0.61(0.45-0.83) | 0.001 | 0.02 | 0  |

SuppTable2.txt

|            |           |        |       |                 |       |      |   |
|------------|-----------|--------|-------|-----------------|-------|------|---|
| cg03611555 | SLC25A21  | 89874  | TRUE  | 0.57(0.41-0.8)  | 0.001 | 0.02 | 0 |
| cg03301801 | FNDG7     | 163479 | FALSE | 0.57(0.4-0.81)  | 0.001 | 0.02 | 0 |
| cg19034028 | CDH3      | 1001   | TRUE  | 0.63(0.47-0.83) | 0.001 | 0.02 | 0 |
| cg12682367 | FLJ46358  | 400110 | FALSE | 1.65(1.21-2.25) | 0.001 | 0.02 | 0 |
| cg04748704 | CHRM2     | 1129   | FALSE | 1.73(1.23-2.44) | 0.001 | 0.02 | 0 |
| cg27161973 | DDX27     | 55661  | TRUE  | 1.7(1.23-2.36)  | 0.001 | 0.02 | 0 |
| cg09039163 | LOC339768 | 339768 | TRUE  | 0.63(0.47-0.83) | 0.001 | 0.02 | 0 |
| cg16504798 | MYO1F     | 4542   | FALSE | 0.61(0.45-0.83) | 0.001 | 0.02 | 0 |
| cg16155702 | FGF21     | 26291  | FALSE | 1.7(1.22-2.36)  | 0.001 | 0.02 | 0 |
| cg07607462 | UBR1      | 197131 | TRUE  | 1.74(1.24-2.45) | 0.001 | 0.02 | 0 |
| cg24147596 | ARL14     | 80117  | FALSE | 1.67(1.21-2.29) | 0.001 | 0.02 | 0 |
| cg05607401 | GMFG      | 9535   | FALSE | 1.63(1.2-2.21)  | 0.001 | 0.02 | 0 |
| cg17745122 | IRX3      | 79191  | TRUE  | 0.58(0.42-0.8)  | 0.001 | 0.02 | 0 |
| cg00629585 | GF1B      | 8328   | FALSE | 1.71(1.22-2.39) | 0.001 | 0.02 | 0 |
| cg26159905 | ASB10     | 136371 | FALSE | 1.67(1.21-2.3)  | 0.001 | 0.02 | 0 |
| cg14153740 | TRY1      | 136541 | FALSE | 1.63(1.2-2.21)  | 0.001 | 0.02 | 0 |
| cg18473117 | CCDC22    | 28952  | TRUE  | 0.48(0.31-0.75) | 0.001 | 0.02 | 0 |
| cg26129916 | GGA3      | 23163  | TRUE  | 1.65(1.21-2.24) | 0.001 | 0.02 | 0 |
| cg03030757 | FANCE     | 2178   | TRUE  | 0.61(0.45-0.83) | 0.001 | 0.02 | 0 |
| cg18705776 | CALML3    | 810    | FALSE | 1.66(1.21-2.28) | 0.001 | 0.02 | 0 |
| cg15703690 | IL6       | 3569   | FALSE | 0.58(0.41-0.81) | 0.001 | 0.02 | 0 |
| cg18117847 | ZNFN1A1   | 10320  | FALSE | 1.83(1.26-2.65) | 0.001 | 0.02 | 0 |
| cg01348086 | RGS14     | 10636  | FALSE | 1.68(1.22-2.31) | 0.001 | 0.02 | 0 |
| cg04488758 | USP44     | 84101  | FALSE | 1.63(1.2-2.21)  | 0.001 | 0.02 | 0 |
| cg02192855 | HIST1H2BI | 8346   | TRUE  | 1.7(1.22-2.37)  | 0.001 | 0.02 | 0 |
| cg03085312 | RARA      | 5914   | FALSE | 0.61(0.45-0.83) | 0.001 | 0.02 | 0 |
| cg25495394 | SAP18     | 10284  | TRUE  | 1.64(1.21-2.23) | 0.002 | 0.02 | 0 |

SuppTable2.txt

|            |          |        |       |                 |       |      |   |
|------------|----------|--------|-------|-----------------|-------|------|---|
| cg21123573 | SIRT4    | 23409  | TRUE  | 1.75(1.23-2.49) | 0.002 | 0.02 | 0 |
| cg16626670 | CLEC4G   | 339390 | FALSE | 0.61(0.45-0.83) | 0.002 | 0.02 | 0 |
| cg04459030 | GHRH     | 2691   | FALSE | 1.63(1.2-2.23)  | 0.002 | 0.02 | 0 |
| cg06746171 | ATOX1    | 475    | TRUE  | 1.72(1.23-2.4)  | 0.002 | 0.02 | 0 |
| cg22375610 | APOBEC2  | 10930  | FALSE | 1.63(1.2-2.21)  | 0.002 | 0.02 | 0 |
| cg26124016 | RARB     | 5915   | TRUE  | 0.6(0.44-0.82)  | 0.002 | 0.02 | 0 |
| cg18085435 | ATP8B1   | 5205   | TRUE  | 1.7(1.22-2.36)  | 0.002 | 0.02 | 0 |
| cg23696834 | GNMT     | 27232  | TRUE  | 0.57(0.4-0.81)  | 0.002 | 0.02 | 0 |
| cg24751129 | GNMT     | 27232  | TRUE  | 0.58(0.41-0.81) | 0.002 | 0.02 | 0 |
| cg27236973 | KRT17    | 3872   | TRUE  | 0.58(0.42-0.81) | 0.002 | 0.02 | 0 |
| cg16272420 | PNLIPRP2 | 5408   | FALSE | 1.75(1.24-2.47) | 0.002 | 0.02 | 0 |
| cg16016036 | TPO      | 7173   | TRUE  | 0.54(0.37-0.79) | 0.002 | 0.02 | 0 |
| cg04915566 | RUNX1    | 861    | FALSE | 1.67(1.21-2.3)  | 0.002 | 0.02 | 0 |
| cg25775449 | LTB4R    | 1241   | FALSE | 0.59(0.43-0.82) | 0.002 | 0.02 | 0 |
| cg03875678 | GZMB     | 3002   | FALSE | 1.62(1.19-2.19) | 0.002 | 0.02 | 0 |
| cg05840553 | LRSAM1   | 90678  | FALSE | 0.61(0.45-0.83) | 0.002 | 0.02 | 0 |
| cg19770955 | DUS4L    | 11062  | FALSE | 0.59(0.43-0.82) | 0.002 | 0.02 | 0 |
| cg16581199 | TSSK1    | 83942  | FALSE | 1.68(1.21-2.32) | 0.002 | 0.02 | 0 |
| cg09426307 | SEC14L3  | 266629 | FALSE | 1.72(1.23-2.42) | 0.002 | 0.02 | 0 |
| cg05253327 | B3GNT1   | 10678  | FALSE | 0.6(0.43-0.83)  | 0.002 | 0.02 | 0 |
| cg25250998 | GSTO2    | 119391 | TRUE  | 1.63(1.21-2.21) | 0.002 | 0.02 | 0 |
| cg00394658 | PTPRJ    | 5795   | TRUE  | 0.63(0.47-0.84) | 0.002 | 0.02 | 0 |
| cg22386774 | CRYGA    | 1418   | FALSE | 1.61(1.2-2.16)  | 0.002 | 0.02 | 0 |
| cg05091653 | SP100    | 6672   | FALSE | 1.75(1.23-2.47) | 0.002 | 0.02 | 0 |
| cg00935388 | RNASE8   | 122665 | FALSE | 0.62(0.46-0.84) | 0.002 | 0.02 | 0 |
| cg12515638 | SFRP4    | 6424   | TRUE  | 0.62(0.46-0.84) | 0.002 | 0.02 | 0 |
| cg07448499 | CTSH     | 1512   | TRUE  | 1.7(1.23-2.34)  | 0.002 | 0.02 | 0 |

SuppTable2.txt

|            |          |        |       |                 |       |      |   |
|------------|----------|--------|-------|-----------------|-------|------|---|
| cg02883161 | MS11     | 4440   | TRUE  | 1.89(1.26-2.82) | 0.002 | 0.02 | 0 |
| cg27221338 | KDELR2   | 11014  | TRUE  | 0.6(0.43-0.83)  | 0.002 | 0.02 | 0 |
| cg10591174 | MYL2     | 4633   | FALSE | 1.67(1.21-2.31) | 0.002 | 0.02 | 0 |
| cg00406844 | RFP13    | 10738  | FALSE | 1.67(1.22-2.28) | 0.002 | 0.02 | 0 |
| cg03165700 | ATM      | 472    | TRUE  | 1.66(1.21-2.28) | 0.002 | 0.02 | 0 |
| cg27601582 | ITGB1BP3 | 27231  | FALSE | 0.57(0.4-0.8)   | 0.002 | 0.02 | 0 |
| cg25741452 | KITLG    | 4254   | TRUE  | 0.38(0.21-0.69) | 0.002 | 0.02 | 0 |
| cg10163825 | C16orf25 | 124093 | TRUE  | 0.62(0.46-0.83) | 0.002 | 0.02 | 0 |
| cg06621126 | HSF4     | 3299   | TRUE  | 0.59(0.43-0.81) | 0.002 | 0.02 | 0 |
| cg20832020 | VSIG9    | 201633 | FALSE | 1.69(1.22-2.36) | 0.002 | 0.02 | 0 |
| cg25662535 | ART5     | 116969 | TRUE  | 0.62(0.46-0.83) | 0.002 | 0.02 | 0 |
| cg11170179 | KLK10    | 5655   | TRUE  | 0.59(0.42-0.82) | 0.002 | 0.02 | 0 |
| cg14076161 | PRB4     | 5545   | FALSE | 1.65(1.2-2.26)  | 0.002 | 0.02 | 0 |
| cg03900542 | DEDD2    | 162989 | TRUE  | 1.74(1.23-2.46) | 0.002 | 0.02 | 0 |
| cg01410472 | CRISPLD1 | 83690  | TRUE  | 0.61(0.45-0.83) | 0.002 | 0.02 | 0 |
| cg14261863 | ELMO2    | 63916  | TRUE  | 1.79(1.25-2.56) | 0.002 | 0.02 | 0 |
| cg22424746 | VTCN1    | 79679  | FALSE | 1.64(1.2-2.23)  | 0.002 | 0.02 | 0 |
| cg18905952 | NRBP1    | 29959  | TRUE  | 1.78(1.25-2.55) | 0.002 | 0.02 | 0 |
| cg10798171 | ICA1     | 3382   | TRUE  | 0.61(0.44-0.83) | 0.002 | 0.02 | 0 |
| cg08905118 | RP2      | 6102   | TRUE  | 1.99(1.3-3.06)  | 0.002 | 0.02 | 0 |
| cg01656216 | ZNF438   | 220929 | FALSE | 0.59(0.42-0.82) | 0.002 | 0.02 | 0 |
| cg02245418 | ZNF364   | 27246  | FALSE | 0.58(0.41-0.82) | 0.002 | 0.02 | 0 |
| cg18843688 | NUFIP1   | 26747  | TRUE  | 1.65(1.21-2.26) | 0.002 | 0.02 | 0 |
| cg15384717 | PRPF3    | 9129   | TRUE  | 1.68(1.21-2.33) | 0.002 | 0.02 | 0 |
| cg25551168 | AVP      | 551    | FALSE | 0.63(0.47-0.84) | 0.002 | 0.02 | 0 |
| cg06808983 | G6PC3    | 92579  | TRUE  | 1.63(1.2-2.22)  | 0.002 | 0.02 | 0 |
| cg23412850 | SOCS2    | 8835   | TRUE  | 0.59(0.42-0.82) | 0.002 | 0.02 | 0 |

SuppTable2.txt

|            |           |        |       |                 |       |      |    |
|------------|-----------|--------|-------|-----------------|-------|------|----|
| cg13492227 | FGF11     | 2256   | TRUE  | 0.59(0.43-0.82) | 0.002 | 0.02 | 0  |
| cg18053607 | PIB5PA    | 27124  | FALSE | 0.63(0.46-0.84) | 0.002 | 0.02 | -1 |
| cg21197871 | C8orf38   | 137682 | TRUE  | 0.6(0.43-0.82)  | 0.002 | 0.02 | 0  |
| cg21291985 | BTBD4     | 140685 | TRUE  | 0.62(0.46-0.83) | 0.002 | 0.02 | 0  |
| cg03297731 | GDPD3     | 79153  | FALSE | 1.64(1.2-2.25)  | 0.002 | 0.02 | 0  |
| cg19208681 | RAD51C    | 5889   | TRUE  | 1.61(1.2-2.15)  | 0.002 | 0.02 | 0  |
| cg11256230 | BCL2      | 596    | TRUE  | 1.76(1.23-2.51) | 0.002 | 0.02 | 0  |
| cg08548888 | MYD88     | 4615   | TRUE  | 1.8(1.26-2.56)  | 0.002 | 0.02 | 0  |
| cg23097681 | ARHGAP24  | 83478  | TRUE  | 0.59(0.43-0.81) | 0.002 | 0.02 | 0  |
| cg18780284 | SPRR1B    | 6699   | FALSE | 1.64(1.21-2.23) | 0.002 | 0.02 | 0  |
| cg07543883 | ANGPTL6   | 83854  | FALSE | 1.64(1.2-2.23)  | 0.002 | 0.02 | 0  |
| cg21601405 | CD40      | 958    | TRUE  | 0.58(0.41-0.82) | 0.002 | 0.02 | 0  |
| cg10421192 | CTAGE1    | 64693  | TRUE  | 0.5(0.33-0.77)  | 0.002 | 0.02 | 0  |
| cg11608424 | LOC253012 | 253012 | FALSE | 1.8(1.25-2.59)  | 0.002 | 0.02 | 0  |
| cg15422147 | SERPINB5  | 5268   | FALSE | 1.65(1.2-2.26)  | 0.002 | 0.02 | 0  |
| cg13288195 | FBXL22    | 283807 | FALSE | 0.6(0.44-0.83)  | 0.002 | 0.02 | 0  |
| cg22441882 | SLC18A1   | 6570   | FALSE | 1.8(1.26-2.59)  | 0.002 | 0.02 | 0  |
| cg01136458 | CSMD1     | 64478  | FALSE | 1.66(1.21-2.28) | 0.002 | 0.02 | 0  |
| cg04929865 | BGN       | 633    | FALSE | 1.61(1.19-2.17) | 0.002 | 0.02 | 0  |
| cg01497576 | SLC24A5   | 283652 | FALSE | 1.62(1.21-2.18) | 0.002 | 0.02 | 0  |
| cg20259398 | CDCATL    | 55536  | TRUE  | 1.78(1.25-2.53) | 0.002 | 0.02 | 0  |
| cg03862760 | MGC10911  | 84262  | TRUE  | 1.73(1.23-2.43) | 0.002 | 0.02 | 0  |
| cg09146695 | LEF1      | 51176  | TRUE  | 1.66(1.21-2.28) | 0.002 | 0.02 | 0  |
| cg25635500 | RRP22     | 10633  | TRUE  | 0.61(0.45-0.84) | 0.002 | 0.02 | 0  |
| cg05323436 | LAMB2     | 3913   | TRUE  | 0.62(0.45-0.84) | 0.002 | 0.02 | 0  |
| cg20430816 | GENX-3414 | 8987   | TRUE  | 0.6(0.43-0.82)  | 0.002 | 0.02 | 0  |
| cg00571634 | WDR5B     | 54554  | TRUE  | 1.78(1.24-2.57) | 0.002 | 0.02 | 0  |

## SuppTable2.txt

|            |           |        |       |                 |       |      |   |
|------------|-----------|--------|-------|-----------------|-------|------|---|
| cg20492401 | KIAA0195  | 9772   | TRUE  | 1.63(1.21-2.19) | 0.002 | 0.02 | 0 |
| cg06207460 | AK3       | 50808  | TRUE  | 1.8(1.24-2.61)  | 0.002 | 0.02 | 0 |
| cg16396488 | PLA2G1B   | 5319   | FALSE | 1.62(1.19-2.19) | 0.002 | 0.02 | 0 |
| cg15156367 | ABHD7     | 253152 | TRUE  | 0.58(0.41-0.81) | 0.002 | 0.02 | 0 |
| cg09425228 | CCL20     | 6364   | FALSE | 1.62(1.2-2.19)  | 0.002 | 0.02 | 0 |
| cg11560645 |           | 3502   | FALSE | 1.69(1.21-2.35) | 0.002 | 0.02 | 0 |
| cg01726767 | LALBA     | 3906   | FALSE | 1.68(1.22-2.3)  | 0.002 | 0.02 | 0 |
| cg10895130 | BNIPL     | 149428 | FALSE | 0.62(0.45-0.84) | 0.002 | 0.02 | 0 |
| cg12891678 | SPRR2D    | 6703   | FALSE | 1.62(1.19-2.2)  | 0.002 | 0.02 | 0 |
| cg22010317 | CXorf36   | 79742  | FALSE | 1.61(1.19-2.17) | 0.002 | 0.02 | 0 |
| cg11119596 | CD96      | 10225  | FALSE | 1.81(1.24-2.64) | 0.002 | 0.02 | 0 |
| cg20308817 | CLEC11A   | 6320   | FALSE | 0.6(0.43-0.83)  | 0.002 | 0.02 | 0 |
| cg19822214 | CNOT3     | 4849   | TRUE  | 1.76(1.25-2.49) | 0.002 | 0.02 | 0 |
| cg03660451 | RECQL5    | 9400   | FALSE | 0.61(0.44-0.84) | 0.002 | 0.02 | 0 |
| cg22821324 | GPM6A     | 2823   | TRUE  | 0.58(0.41-0.81) | 0.002 | 0.02 | 0 |
| cg13108328 | PLEKHA5   | 54477  | TRUE  | 1.65(1.2-2.26)  | 0.002 | 0.02 | 0 |
| cg21716693 | CPNE5     | 57699  | TRUE  | 0.59(0.43-0.82) | 0.002 | 0.02 | 0 |
| cg16052901 | VPS52     | 6293   | FALSE | 1.67(1.21-2.31) | 0.002 | 0.02 | 0 |
| cg08440425 | LRRCS1    | 220074 | TRUE  | 1.62(1.2-2.19)  | 0.002 | 0.02 | 0 |
| cg14473145 | CLEC14A   | 161198 | TRUE  | 0.58(0.42-0.82) | 0.002 | 0.02 | 0 |
| cg02318426 | NFKBIA    | 4792   | TRUE  | 1.71(1.22-2.41) | 0.002 | 0.02 | 0 |
| cg08758850 | NR6A1     | 2649   | TRUE  | 0.56(0.39-0.8)  | 0.002 | 0.02 | 0 |
| cg04764624 | RAB11FIP4 | 84440  | TRUE  | 0.61(0.44-0.83) | 0.002 | 0.02 | 0 |
| cg26024531 | CHAF1B    | 8208   | TRUE  | 1.68(1.22-2.3)  | 0.002 | 0.02 | 0 |
| cg24585690 | IL9       | 3578   | FALSE | 1.66(1.2-2.28)  | 0.002 | 0.02 | 0 |
| cg14859417 | PTPRE     | 5791   | TRUE  | 0.61(0.45-0.84) | 0.002 | 0.02 | 0 |
| cg20385229 | ALKBH     | 8846   | FALSE | 1.65(1.21-2.27) | 0.002 | 0.02 | 0 |

SuppTable2.txt

|            |         |        |       |                 |       |      |    |
|------------|---------|--------|-------|-----------------|-------|------|----|
| cg14984307 | ACYP1   | 97     | TRUE  | 1.66(1.21-2.29) | 0.002 | 0.02 | 0  |
| cg02409351 | CART1   | 8092   | TRUE  | 0.59(0.42-0.82) | 0.002 | 0.02 | 0  |
| cg22421766 | SCNN1D  | 6339   | FALSE | 0.61(0.45-0.84) | 0.002 | 0.02 | 0  |
| cg12563178 | PLXDC2  | 84898  | TRUE  | 0.55(0.38-0.79) | 0.002 | 0.02 | 0  |
| cg03712843 | STOML3  | 161003 | FALSE | 0.61(0.45-0.83) | 0.002 | 0.02 | 0  |
| cg04415689 | TMEM16G | 50636  | FALSE | 1.85(1.25-2.75) | 0.002 | 0.02 | 0  |
| cg05641882 | CXCL3   | 2921   | TRUE  | 0.6(0.44-0.83)  | 0.002 | 0.02 | 0  |
| cg13927251 | FLT4    | 2324   | TRUE  | 1.67(1.21-2.31) | 0.002 | 0.02 | 0  |
| cg19091641 | ZP2     | 7783   | FALSE | 0.6(0.43-0.83)  | 0.002 | 0.02 | 0  |
| cg22667787 | APTX    | 54840  | TRUE  | 1.63(1.2-2.23)  | 0.002 | 0.02 | 0  |
| cg27299588 | PTPRS   | 5802   | FALSE | 1.66(1.2-2.3)   | 0.002 | 0.02 | 0  |
| cg16363586 | BST2    | 684    | TRUE  | 0.61(0.44-0.84) | 0.002 | 0.02 | -1 |
| cg04280397 | PLA2G6  | 8398   | TRUE  | 0.61(0.45-0.84) | 0.002 | 0.02 | 0  |
| cg10770524 | SMA3    | 10571  | FALSE | 1.6(1.19-2.15)  | 0.002 | 0.02 | 0  |
| cg24480859 | SLC2A5  | 6518   | FALSE | 0.6(0.44-0.83)  | 0.002 | 0.02 | 0  |
| cg03025569 | TRIM16  | 10626  | FALSE | 0.63(0.47-0.84) | 0.002 | 0.02 | 0  |
| cg06742978 | ACCN2   | 41     | TRUE  | 0.59(0.43-0.83) | 0.002 | 0.02 | 0  |
| cg03922337 | RRAS2   | 22800  | TRUE  | 1.65(1.2-2.28)  | 0.002 | 0.02 | 0  |
| cg13892015 | PPIL5   | 122769 | TRUE  | 1.68(1.21-2.34) | 0.002 | 0.02 | 0  |
| cg10056627 | GNMT    | 27232  | TRUE  | 0.62(0.45-0.84) | 0.002 | 0.02 | 0  |
| cg20150565 | ZNF-X1  | 57169  | TRUE  | 1.69(1.21-2.36) | 0.002 | 0.02 | 0  |
| cg07985359 | EVI5L   | 115704 | TRUE  | 1.59(1.19-2.13) | 0.002 | 0.02 | 0  |
| cg21624359 | FFAR3   | 2865   | FALSE | 0.63(0.47-0.84) | 0.002 | 0.02 | 0  |
| cg03876618 | IGFBP7  | 3490   | TRUE  | 0.36(0.19-0.69) | 0.002 | 0.02 | 0  |
| cg02813863 | APOLD1  | 81575  | FALSE | 0.58(0.41-0.81) | 0.002 | 0.02 | 0  |
| cg15640375 | PRG2    | 79948  | TRUE  | 0.57(0.4-0.81)  | 0.002 | 0.02 | 0  |
| cg25361106 | TLX2    | 3196   | TRUE  | 0.6(0.43-0.83)  | 0.002 | 0.02 | 0  |

SupplTable2.txt

|             |           |        |       |                 |       |      |    |
|-------------|-----------|--------|-------|-----------------|-------|------|----|
| cg01471384  | DKK2      | 27123  | TRUE  | 0.58(0.41-0.82) | 0.002 | 0.02 | 0  |
| cg09169633  | MAN2A2    | 4122   | FALSE | 0.59(0.42-0.83) | 0.002 | 0.02 | 0  |
| cg00795268  | C11orf55  | 399879 | FALSE | 0.59(0.43-0.83) | 0.002 | 0.02 | 0  |
| cg08040428  | PSD3      | 23362  | TRUE  | 0.61(0.45-0.83) | 0.002 | 0.02 | 0  |
| cg15616083  | KCNQ2     | 3785   | FALSE | 0.63(0.47-0.85) | 0.002 | 0.02 | 0  |
| cg00105253  | NUDT14    | 256281 | TRUE  | 0.59(0.42-0.83) | 0.002 | 0.02 | -1 |
| cg20644981  | RPS3A     | 6189   | TRUE  | 1.9(1.28-2.81)  | 0.002 | 0.02 | 0  |
| cg02493771  | KRTAP13-2 | 337959 | FALSE | 1.62(1.19-2.2)  | 0.002 | 0.02 | 0  |
| cg09022293  | SPATA18   | 132671 | TRUE  | 0.57(0.39-0.82) | 0.002 | 0.02 | 0  |
| cg18669588  | PTK9L     | 11344  | TRUE  | 1.63(1.19-2.23) | 0.002 | 0.02 | 0  |
| cg122297221 | ART5      | 116969 | TRUE  | 0.6(0.44-0.83)  | 0.002 | 0.02 | 0  |
| cg03003745  | UNQ473    | 284340 | FALSE | 1.62(1.19-2.21) | 0.002 | 0.02 | 0  |
| cg06630567  | AMBP      | 259    | FALSE | 0.62(0.46-0.84) | 0.002 | 0.02 | 0  |
| cg07243932  | SLC30A4   | 7782   | TRUE  | 1.65(1.2-2.28)  | 0.002 | 0.02 | 0  |
| cg11849692  | LDB1      | 8861   | FALSE | 0.61(0.45-0.83) | 0.002 | 0.02 | 0  |
| cg03459809  | EPHX1     | 2052   | FALSE | 1.71(1.22-2.41) | 0.002 | 0.02 | 0  |
| cg19854301  | CDH13     | 1012   | TRUE  | 0.61(0.44-0.83) | 0.002 | 0.02 | 0  |
| cg18621299  | EVL       | 51466  | FALSE | 1.72(1.21-2.43) | 0.002 | 0.02 | 0  |
| cg10316635  | INADL     | 10207  | TRUE  | 0.62(0.45-0.84) | 0.002 | 0.02 | 0  |
| cg22527415  | LSM16     | 80153  | TRUE  | 1.63(1.19-2.23) | 0.002 | 0.02 | 0  |
| cg04880762  | VAMP1     | 6843   | TRUE  | 1.67(1.2-2.31)  | 0.002 | 0.02 | 0  |
| cg11769360  | LRAP      | 64167  | FALSE | 0.59(0.43-0.83) | 0.002 | 0.02 | 0  |
| cg01275830  | C10orf95  | 79946  | TRUE  | 0.6(0.44-0.83)  | 0.002 | 0.02 | 0  |
| cg11220060  | KLF1      | 10661  | FALSE | 0.63(0.46-0.85) | 0.002 | 0.02 | 0  |
| cg18801806  | DLNB14    | 338657 | TRUE  | 1.61(1.2-2.17)  | 0.002 | 0.02 | 0  |
| cg22349489  | HIST1H2AH | 85235  | TRUE  | 1.66(1.2-2.3)   | 0.002 | 0.02 | 0  |
| cg23178308  | C21orf124 | 85006  | TRUE  | 0.59(0.42-0.83) | 0.002 | 0.02 | 0  |

SuppTable2.txt

|            |          |        |       |                 |       |      |   |
|------------|----------|--------|-------|-----------------|-------|------|---|
| cg00602891 | C17orf62 | 79415  | TRUE  | 1.69(1.22-2.35) | 0.002 | 0.02 | 0 |
| cg27412902 | IL29     | 282618 | FALSE | 1.74(1.21-2.49) | 0.002 | 0.02 | 0 |
| cg02317907 | DIRAS3   | 9077   | TRUE  | 0.59(0.43-0.82) | 0.002 | 0.02 | 0 |
| cg06154597 | MGC4618  | 84286  | FALSE | 1.63(1.19-2.23) | 0.002 | 0.02 | 0 |
| cg11466837 | TRIM29   | 23650  | FALSE | 1.7(1.21-2.4)   | 0.002 | 0.02 | 0 |
| cg14319409 | GLRA1    | 2741   | TRUE  | 1.64(1.19-2.26) | 0.002 | 0.02 | 1 |
| cg04833845 | KCNNA4   | 3783   | FALSE | 1.66(1.2-2.3)   | 0.002 | 0.02 | 0 |
| cg26608667 | MGC11257 | 84310  | TRUE  | 0.63(0.47-0.85) | 0.002 | 0.02 | 0 |
| cg01615704 | MALL     | 7851   | TRUE  | 0.59(0.43-0.82) | 0.002 | 0.02 | 0 |
| cg23054883 | FZD10    | 11211  | TRUE  | 0.59(0.43-0.83) | 0.002 | 0.02 | 0 |
| cg05237543 | MTDH     | 92140  | TRUE  | 1.68(1.2-2.34)  | 0.002 | 0.02 | 0 |
| cg04548378 | CDKN1C   | 1028   | TRUE  | 1.76(1.22-2.52) | 0.002 | 0.02 | 0 |
| cg22946150 | SH3GL3   | 6457   | TRUE  | 0.5(0.32-0.78)  | 0.002 | 0.02 | 0 |
| cg01610488 | TRPA1    | 8989   | TRUE  | 0.59(0.42-0.82) | 0.002 | 0.02 | 0 |
| cg26718122 | SFRS6    | 6431   | TRUE  | 1.94(1.28-2.95) | 0.002 | 0.02 | 0 |
| cg17240987 | WFDc3    | 140686 | FALSE | 0.6(0.44-0.83)  | 0.002 | 0.02 | 0 |
| cg08064891 | PTOV1    | 53635  | TRUE  | 1.64(1.19-2.26) | 0.002 | 0.02 | 0 |
| cg23226134 | CLCN6    | 1185   | TRUE  | 1.62(1.18-2.21) | 0.002 | 0.02 | 0 |
| cg18468842 | SLC13A3  | 64849  | TRUE  | 0.63(0.46-0.85) | 0.002 | 0.02 | 0 |
| cg13210534 | HSPB2    | 3316   | FALSE | 1.61(1.19-2.17) | 0.002 | 0.02 | 0 |
| cg05894797 | PSEN2    | 5664   | TRUE  | 0.6(0.43-0.84)  | 0.002 | 0.02 | 0 |
| cg08569678 | LY6K     | 54742  | TRUE  | 0.63(0.47-0.85) | 0.002 | 0.02 | 0 |
| cg21449655 | CASP9    | 842    | TRUE  | 1.65(1.19-2.29) | 0.002 | 0.02 | 0 |
| cg09513026 | WNT8A    | 7478   | FALSE | 0.63(0.46-0.84) | 0.002 | 0.02 | 0 |
| cg19042947 | SERPINA4 | 5267   | FALSE | 1.62(1.19-2.2)  | 0.002 | 0.02 | 0 |
| cg26829529 | SPACA3   | 124912 | FALSE | 1.6(1.18-2.17)  | 0.002 | 0.02 | 0 |
| cg05675373 | KCNCA4   | 3749   | TRUE  | 1.76(1.22-2.55) | 0.002 | 0.02 | 1 |

SuppTable2.txt

|            |          |        |       |                 |       |      |    |
|------------|----------|--------|-------|-----------------|-------|------|----|
| cg01739167 | CHRNA    | 1145   | FALSE | 1.69(1.21-2.35) | 0.002 | 0.02 | 0  |
| cg23346960 | ZFP36    | 7538   | TRUE  | 1.65(1.19-2.29) | 0.002 | 0.02 | 0  |
| cg16899442 | C16orf25 | 124093 | FALSE | 0.63(0.47-0.85) | 0.002 | 0.02 | 0  |
| cg05508084 | ZNF667   | 63934  | TRUE  | 0.57(0.39-0.82) | 0.002 | 0.02 | 0  |
| cg07356771 | CHDH     | 55349  | TRUE  | 0.6(0.44-0.83)  | 0.002 | 0.02 | 0  |
| cg10365880 | PKD2L1   | 9033   | FALSE | 1.65(1.2-2.27)  | 0.002 | 0.02 | 0  |
| cg10627136 | HINT1    | 3094   | TRUE  | 1.68(1.2-2.35)  | 0.002 | 0.02 | 0  |
| cg08017606 | SH3RF2   | 153769 | TRUE  | 1.67(1.2-2.34)  | 0.002 | 0.02 | 0  |
| cg09874127 | UBE1L    | 7318   | FALSE | 1.6(1.18-2.17)  | 0.002 | 0.02 | 0  |
| cg15989091 | LOXL3    | 84695  | FALSE | 0.63(0.47-0.84) | 0.002 | 0.02 | 0  |
| cg25524473 | DUSP5    | 1847   | TRUE  | 1.67(1.2-2.32)  | 0.002 | 0.02 | 0  |
| cg16682903 | ACVR1    | 90     | FALSE | 0.58(0.41-0.83) | 0.002 | 0.02 | -1 |
| cg07685034 | PCBP3    | 54039  | FALSE | 1.63(1.19-2.24) | 0.002 | 0.02 | 0  |
| cg02144933 | AOX1     | 316    | TRUE  | 0.59(0.42-0.83) | 0.002 | 0.02 | 0  |
| cg14611112 | LCN6     | 158062 | FALSE | 0.61(0.45-0.84) | 0.002 | 0.02 | 0  |
| cg08222662 | ZC3HAV1  | 56829  | TRUE  | 1.72(1.22-2.44) | 0.002 | 0.02 | 0  |
| cg17749384 | MPP7     | 143098 | FALSE | 0.62(0.46-0.84) | 0.002 | 0.02 | 0  |
| cg23617121 | OSBPL5   | 114879 | TRUE  | 1.68(1.21-2.33) | 0.002 | 0.02 | 0  |
| cg16293991 | CPSEF3L  | 54973  | TRUE  | 1.69(1.2-2.37)  | 0.002 | 0.02 | 0  |
| cg22580512 | NCOR2    | 9612   | TRUE  | 0.61(0.44-0.84) | 0.002 | 0.02 | -1 |
| cg10683939 | C16orf47 | 388289 | FALSE | 0.59(0.42-0.83) | 0.002 | 0.02 | 0  |
| cg09082287 | DNAJC6   | 9829   | TRUE  | 0.61(0.44-0.83) | 0.002 | 0.02 | 0  |
| cg21667943 | CIP29    | 84324  | TRUE  | 1.64(1.19-2.28) | 0.002 | 0.02 | 0  |
| cg03851112 | BBS1     | 582    | FALSE | 0.6(0.43-0.84)  | 0.002 | 0.02 | 0  |
| cg12435792 | PDE6B    | 5158   | TRUE  | 1.65(1.19-2.29) | 0.002 | 0.02 | 0  |
| cg26199493 | LIN9     | 286826 | TRUE  | 0.6(0.44-0.84)  | 0.002 | 0.02 | 0  |
| cg09475757 | NEIL3    | 55247  | TRUE  | 1.66(1.19-2.31) | 0.002 | 0.02 | 0  |

SuppTable2.txt

|            |          |        |       |                 |       |      |    |
|------------|----------|--------|-------|-----------------|-------|------|----|
| cg21572316 | ABCA1    | 19     | TRUE  | 0.61(0.45-0.84) | 0.002 | 0.02 | 0  |
| cg25856811 | SPRR3    | 6707   | FALSE | 1.66(1.19-2.3)  | 0.002 | 0.02 | 0  |
| cg06777581 | RNF8     | 9025   | TRUE  | 1.62(1.18-2.21) | 0.002 | 0.02 | 0  |
| cg26825412 | SOX18    | 54345  | FALSE | 0.64(0.48-0.86) | 0.002 | 0.02 | 0  |
| cg15447486 | GPR109B  | 8843   | FALSE | 0.63(0.46-0.85) | 0.002 | 0.02 | 0  |
| cg19237753 | PTPNS1   | 140885 | TRUE  | 0.61(0.44-0.84) | 0.002 | 0.02 | 0  |
| cg06589885 | HFE2     | 148738 | FALSE | 1.63(1.19-2.24) | 0.002 | 0.02 | 0  |
| cg10938446 | IL1RN    | 3557   | FALSE | 0.63(0.46-0.85) | 0.002 | 0.02 | 0  |
| cg03491478 | MAPK8IP1 | 9479   | TRUE  | 1.69(1.21-2.37) | 0.002 | 0.02 | 0  |
| cg04834572 | DUSP13   | 51207  | FALSE | 0.56(0.39-0.82) | 0.002 | 0.02 | 0  |
| cg18189938 | EPB41    | 2035   | TRUE  | 1.64(1.19-2.28) | 0.002 | 0.02 | 0  |
| cg27532722 | MMP11    | 4320   | TRUE  | 0.61(0.44-0.84) | 0.002 | 0.02 | 0  |
| cg01344171 | C6orf206 | 221421 | TRUE  | 0.64(0.47-0.86) | 0.002 | 0.02 | 0  |
| cg05038121 | FAH      | 2184   | TRUE  | 1.68(1.2-2.35)  | 0.002 | 0.02 | 0  |
| cg17877494 | ACAA1    | 30     | TRUE  | 1.63(1.19-2.23) | 0.002 | 0.02 | 0  |
| cg10704923 | HIST1H1T | 3010   | TRUE  | 0.51(0.32-0.79) | 0.002 | 0.02 | 0  |
| cg05592398 | LIMK1    | 3984   | TRUE  | 0.61(0.44-0.84) | 0.002 | 0.02 | 0  |
| cg22499237 | PDPK1    | 5170   | TRUE  | 1.71(1.2-2.43)  | 0.002 | 0.02 | 0  |
| cg11851098 | MGC26816 | 164684 | TRUE  | 0.62(0.45-0.85) | 0.002 | 0.02 | 0  |
| cg07674153 | TSHR     | 7253   | TRUE  | 1.59(1.18-2.16) | 0.002 | 0.02 | 0  |
| cg25741794 | EFHD2    | 79180  | TRUE  | 1.58(1.17-2.13) | 0.002 | 0.02 | 0  |
| cg24196046 | EIF2C3   | 192669 | TRUE  | 1.72(1.2-2.45)  | 0.002 | 0.02 | 0  |
| cg14070162 | PTRF     | 284119 | TRUE  | 0.63(0.46-0.85) | 0.002 | 0.02 | -1 |
| cg13314167 | C9orf84  | 158401 | TRUE  | 0.61(0.45-0.84) | 0.002 | 0.02 | 0  |
| cg25294646 | OBFC1    | 79991  | TRUE  | 1.66(1.2-2.32)  | 0.002 | 0.02 | 0  |
| cg17805404 | GPR162   | 27239  | FALSE | 0.61(0.44-0.84) | 0.002 | 0.02 | 0  |
| cg07925687 | RABL3    | 285282 | TRUE  | 1.61(1.18-2.17) | 0.002 | 0.02 | 0  |

SuppTable2.txt

|            |           |        |       |                 |       |      |   |
|------------|-----------|--------|-------|-----------------|-------|------|---|
| cg22518733 | CCL3      | 6348   | FALSE | 0.6(0.43-0.84)  | 0.002 | 0.02 | 0 |
| cg21468416 | NEK6      | 10783  | TRUE  | 1.58(1.18-2.11) | 0.002 | 0.02 | 0 |
| cg11011938 | SEMA5A    | 9037   | TRUE  | 0.61(0.44-0.83) | 0.002 | 0.02 | 0 |
| cg11243196 | ADAMTS3   | 9508   | TRUE  | 0.62(0.46-0.84) | 0.002 | 0.02 | 0 |
| cg11179184 | C8orf76   | 84933  | TRUE  | 0.61(0.45-0.84) | 0.002 | 0.02 | 0 |
| cg07099407 | KLC4      | 89953  | TRUE  | 0.61(0.44-0.84) | 0.002 | 0.02 | 0 |
| cg16254309 | CNTNAP2   | 26047  | TRUE  | 0.58(0.41-0.82) | 0.002 | 0.02 | 0 |
| cg16752583 | TRPV6     | 55503  | FALSE | 1.66(1.2-2.3)   | 0.002 | 0.02 | 0 |
| cg25363445 | ALX4      | 60529  | TRUE  | 1.63(1.18-2.24) | 0.002 | 0.02 | 0 |
| cg25892041 | UGT8      | 7368   | FALSE | 0.62(0.46-0.85) | 0.002 | 0.02 | 0 |
| cg12371177 | PLEKHG6   | 55200  | TRUE  | 0.62(0.45-0.85) | 0.002 | 0.02 | 0 |
| cg23352695 | EV12A     | 2123   | FALSE | 1.6(1.18-2.17)  | 0.002 | 0.02 | 0 |
| cg04653021 | DIRC2     | 84925  | TRUE  | 0.6(0.42-0.84)  | 0.002 | 0.02 | 0 |
| cg01442481 | RALY      | 22913  | TRUE  | 1.57(1.17-2.12) | 0.002 | 0.02 | 0 |
| cg07973967 | CD79B     | 974    | TRUE  | 0.59(0.42-0.83) | 0.002 | 0.02 | 0 |
| cg10748867 | C1orf33   | 51154  | FALSE | 0.62(0.45-0.85) | 0.002 | 0.02 | 0 |
| cg09619786 | RPP25     | 54913  | TRUE  | 0.62(0.46-0.85) | 0.002 | 0.02 | 0 |
| cg04582938 | UAP1L1    | 91373  | TRUE  | 0.63(0.46-0.85) | 0.002 | 0.02 | 0 |
| cg19586576 | GJA7      | 10052  | TRUE  | 1.69(1.2-2.37)  | 0.002 | 0.02 | 0 |
| cg13255629 | MEPE      | 56955  | FALSE | 1.75(1.21-2.53) | 0.002 | 0.02 | 0 |
| cg05306176 | FVT1      | 2531   | TRUE  | 1.68(1.21-2.34) | 0.002 | 0.02 | 0 |
| cg22747092 | BTBD14A   | 138151 | TRUE  | 0.61(0.44-0.84) | 0.002 | 0.02 | 0 |
| cg20029201 | BCL9L     | 283149 | TRUE  | 1.62(1.19-2.21) | 0.002 | 0.02 | 0 |
| cg16761041 | C9orf100S | 158293 | TRUE  | 1.65(1.19-2.29) | 0.002 | 0.02 | 0 |
| cg04629204 | EXTL1     | 2134   | FALSE | 1.66(1.2-2.3)   | 0.002 | 0.02 | 0 |
| cg21238818 | GAL3ST3   | 89792  | TRUE  | 0.61(0.45-0.84) | 0.002 | 0.02 | 0 |
| cg16358738 | AGXT      | 189    | FALSE | 1.66(1.2-2.3)   | 0.002 | 0.02 | 0 |

SupplTable2.txt

|            |           |        |       |                 |       |      |   |
|------------|-----------|--------|-------|-----------------|-------|------|---|
| cg10375110 | CHRNA9    | 55584  | FALSE | 1.64(1.19-2.25) | 0.002 | 0.02 | 0 |
| cg14358743 | GAS6      | 2621   | TRUE  | 0.61(0.44-0.85) | 0.002 | 0.02 | 0 |
| cg21771250 | FAM83F    | 113828 | TRUE  | 0.62(0.45-0.85) | 0.002 | 0.02 | 0 |
| cg09419900 | C10orf89  | 118672 | FALSE | 0.64(0.48-0.86) | 0.003 | 0.02 | 0 |
| cg00899641 | SF3B1     | 23451  | TRUE  | 1.58(1.18-2.11) | 0.003 | 0.02 | 0 |
| cg23587449 | LRAT      | 9227   | TRUE  | 0.57(0.39-0.82) | 0.003 | 0.02 | 0 |
| cg21509023 | HBA2      | 3040   | TRUE  | 0.61(0.44-0.84) | 0.003 | 0.02 | 0 |
| cg12818699 | C6orf32   | 9750   | FALSE | 1.59(1.17-2.16) | 0.003 | 0.02 | 0 |
| cg24194775 | NPR2      | 4882   | TRUE  | 0.62(0.46-0.85) | 0.003 | 0.02 | 0 |
| cg26991946 | SEMA4G    | 57715  | FALSE | 1.63(1.18-2.26) | 0.003 | 0.02 | 0 |
| cg17740399 | IPF1      | 3651   | TRUE  | 0.57(0.4-0.82)  | 0.003 | 0.02 | 0 |
| cg23799313 | PAQR7     | 164091 | FALSE | 0.63(0.46-0.86) | 0.003 | 0.02 | 0 |
| cg20016416 | SPTBN2    | 6712   | FALSE | 1.62(1.19-2.21) | 0.003 | 0.02 | 0 |
| cg01644850 | ZNF551    | 90233  | TRUE  | 0.61(0.45-0.84) | 0.003 | 0.02 | 0 |
| cg06701500 | YWHAQ     | 10971  | TRUE  | 0.62(0.45-0.85) | 0.003 | 0.02 | 0 |
| cg20973210 | C19orf35  | 374872 | TRUE  | 0.6(0.43-0.84)  | 0.003 | 0.02 | 0 |
| cg02519218 | CHFR      | 55743  | TRUE  | 1.63(1.18-2.26) | 0.003 | 0.02 | 0 |
| cg06351503 | RDBP      | 7936   | FALSE | 1.61(1.19-2.2)  | 0.003 | 0.02 | 0 |
| cg04879235 | PPY       | 5539   | FALSE | 1.67(1.2-2.32)  | 0.003 | 0.02 | 0 |
| cg12855851 | PGC       | 5225   | FALSE | 1.65(1.19-2.29) | 0.003 | 0.02 | 0 |
| cg25283823 | HIST2H2BE | 8349   | TRUE  | 1.95(1.27-3.01) | 0.003 | 0.02 | 0 |
| cg11062095 | C5orf15   | 56951  | TRUE  | 1.72(1.2-2.46)  | 0.003 | 0.02 | 0 |
| cg23350580 | TBC1D3C   | 414060 | FALSE | 1.64(1.19-2.27) | 0.003 | 0.02 | 0 |
| cg17483510 | GNB4      | 59345  | TRUE  | 0.59(0.42-0.83) | 0.003 | 0.02 | 0 |
| cg17036737 | RBM8A     | 9939   | TRUE  | 1.65(1.19-2.27) | 0.003 | 0.02 | 0 |
| cg12864853 | TPBG      | 7162   | FALSE | 0.58(0.41-0.84) | 0.003 | 0.02 | 0 |
| cg11328149 | LY6G6C    | 80740  | FALSE | 1.74(1.21-2.51) | 0.003 | 0.02 | 0 |

SuppTable2.txt

|            |           |        |       |                 |       |      |   |
|------------|-----------|--------|-------|-----------------|-------|------|---|
| cg19286604 | MGCC39545 | 403312 | TRUE  | 0.55(0.37-0.81) | 0.003 | 0.02 | 0 |
| cg00145118 | GNPDA1    | 10007  | FALSE | 0.62(0.46-0.85) | 0.003 | 0.02 | 0 |
| cg20469837 | GALNT5    | 11227  | FALSE | 0.6(0.42-0.84)  | 0.003 | 0.02 | 0 |
| cg19769182 | PRRT2     | 112476 | TRUE  | 0.63(0.46-0.85) | 0.003 | 0.02 | 0 |
| cg27009703 | HOXA9     | 3205   | TRUE  | 0.61(0.44-0.84) | 0.003 | 0.02 | 0 |
| cg03833774 | ZCCHC5    | 203430 | FALSE | 0.64(0.48-0.86) | 0.003 | 0.02 | 0 |
| cg18972811 | SLIT2     | 9353   | TRUE  | 0.6(0.43-0.83)  | 0.003 | 0.02 | 0 |
| cg18149207 | RORC      | 6097   | FALSE | 1.64(1.18-2.27) | 0.003 | 0.02 | 1 |
| cg25177452 | PRP2      | 134285 | TRUE  | 0.6(0.43-0.83)  | 0.003 | 0.02 | 0 |
| cg03682712 | LOXL1     | 4016   | TRUE  | 0.61(0.44-0.84) | 0.003 | 0.02 | 0 |
| cg08849126 | GPRC5A    | 9052   | TRUE  | 0.58(0.4-0.83)  | 0.003 | 0.02 | 0 |
| cg12556134 | TGIF2     | 60436  | TRUE  | 0.6(0.43-0.84)  | 0.003 | 0.02 | 0 |
| cg17192247 | MAPRE3    | 22924  | TRUE  | 0.62(0.45-0.85) | 0.003 | 0.02 | 0 |
| cg02976574 | FNDCC3B   | 64778  | FALSE | 0.61(0.44-0.85) | 0.003 | 0.02 | 0 |
| cg07733031 | SGTB      | 54557  | TRUE  | 0.58(0.41-0.83) | 0.003 | 0.02 | 0 |
| cg15249164 | ATP5O     | 539    | TRUE  | 1.69(1.2-2.38)  | 0.003 | 0.02 | 0 |
| cg19884262 | FLJ46831  | 399823 | TRUE  | 0.63(0.47-0.85) | 0.003 | 0.02 | 0 |
| cg13306784 | INPP5E    | 56623  | TRUE  | 1.59(1.17-2.17) | 0.003 | 0.02 | 0 |
| cg09682183 | UNC93A    | 54346  | FALSE | 0.62(0.46-0.85) | 0.003 | 0.02 | 0 |
| cg15344028 | ICOS      | 29851  | FALSE | 1.58(1.17-2.14) | 0.003 | 0.02 | 0 |
| cg24801210 | PCNP      | 57092  | TRUE  | 1.9(1.24-2.9)   | 0.003 | 0.02 | 0 |
| cg03782453 | FLJ90575  | 257236 | TRUE  | 0.62(0.46-0.85) | 0.003 | 0.02 | 0 |
| cg00687674 | TMEM84    | 283673 | FALSE | 1.57(1.16-2.11) | 0.003 | 0.02 | 0 |
| cg24352530 | ABCG2     | 9429   | TRUE  | 0.59(0.42-0.82) | 0.003 | 0.02 | 0 |
| cg04454951 | UNQ739    | 375567 | TRUE  | 1.64(1.18-2.28) | 0.003 | 0.02 | 0 |
| cg20264731 | POLB      | 5423   | TRUE  | 1.59(1.17-2.15) | 0.003 | 0.02 | 0 |
| cg18635110 | C20orf116 | 65992  | TRUE  | 1.75(1.21-2.53) | 0.003 | 0.02 | 0 |

SuppTable2.txt

|            |               |        |       |                 |       |      |   |
|------------|---------------|--------|-------|-----------------|-------|------|---|
| cg05668853 | RAB34         | 83871  | TRUE  | 0.63(0.46-0.86) | 0.003 | 0.02 | 0 |
| cg22757447 | IMPACT        | 55364  | TRUE  | 0.6(0.44-0.83)  | 0.003 | 0.02 | 0 |
| cg18091964 | CXorf9        | 54440  | FALSE | 1.65(1.19-2.28) | 0.003 | 0.02 | 0 |
| cg08263647 | LXN           | 56925  | FALSE | 0.61(0.44-0.84) | 0.003 | 0.02 | 0 |
| cg21404906 | XRCC5         | 7520   | TRUE  | 1.69(1.2-2.38)  | 0.003 | 0.02 | 0 |
| cg03752885 | DAPK3         | 1613   | FALSE | 0.61(0.44-0.85) | 0.003 | 0.02 | 0 |
| cg08860143 | MYL6P         | 29895  | FALSE | 1.73(1.21-2.48) | 0.003 | 0.02 | 0 |
| cg27622610 | OR1G1         | 8390   | FALSE | 1.7(1.2-2.43)   | 0.003 | 0.02 | 0 |
| cg07845392 | SLC25A10      | 1468   | TRUE  | 0.64(0.48-0.86) | 0.003 | 0.02 | 0 |
| cg02955504 | TXNL4A        | 10907  | TRUE  | 0.64(0.47-0.86) | 0.003 | 0.02 | 0 |
| cg20424530 | IRAK4         | 51135  | TRUE  | 1.58(1.17-2.13) | 0.003 | 0.02 | 0 |
| cg11999384 | GRN           | 2896   | TRUE  | 1.6(1.17-2.19)  | 0.003 | 0.02 | 0 |
| cg14519000 | GATA5         | 140628 | TRUE  | 1.68(1.19-2.35) | 0.003 | 0.02 | 0 |
| cg14450605 | NCOA4         | 8031   | TRUE  | 0.59(0.42-0.84) | 0.003 | 0.02 | 0 |
| cg17757055 | DKFZP564O0823 | 25849  | TRUE  | 0.61(0.44-0.85) | 0.003 | 0.02 | 0 |
| cg26363196 | ST6GALNAC3    | 256435 | TRUE  | 0.59(0.42-0.83) | 0.003 | 0.02 | 0 |
| cg01015871 | MT4           | 84560  | FALSE | 1.64(1.18-2.26) | 0.003 | 0.02 | 0 |
| cg17166338 | TERT          | 7015   | TRUE  | 0.63(0.47-0.84) | 0.003 | 0.02 | 0 |
| cg25023829 | H2BFS         | 54145  | TRUE  | 0.58(0.41-0.83) | 0.003 | 0.02 | 0 |
| cg08141873 | HRAS          | 3265   | TRUE  | 1.61(1.18-2.2)  | 0.003 | 0.02 | 0 |
| cg04454050 | TREML1        | 340205 | FALSE | 0.64(0.47-0.86) | 0.003 | 0.02 | 0 |
| cg02194878 | EPHA8         | 2046   | TRUE  | 0.59(0.42-0.83) | 0.003 | 0.02 | 0 |
| cg08314660 | PKP3          | 11187  | TRUE  | 1.76(1.21-2.56) | 0.003 | 0.02 | 0 |
| cg21087043 | DCX           | 1641   | FALSE | 1.68(1.19-2.37) | 0.003 | 0.02 | 0 |
| cg22843446 | ASAM          | 79827  | TRUE  | 0.62(0.46-0.85) | 0.003 | 0.02 | 0 |
| cg21172540 | TSSK3         | 81629  | TRUE  | 0.61(0.45-0.84) | 0.003 | 0.02 | 0 |
| cg20768743 | CD226         | 10666  | FALSE | 1.6(1.18-2.18)  | 0.003 | 0.02 | 0 |

SupplTable2.txt

|            |           |        |       |                 |       |      |    |
|------------|-----------|--------|-------|-----------------|-------|------|----|
| cg04645049 | ARL6P5    | 10560  | TRUE  | 1.58(1.16-2.16) | 0.003 | 0.02 | 0  |
| cg12432709 | CCDC68    | 80323  | FALSE | 0.64(0.48-0.86) | 0.003 | 0.02 | 0  |
| cg18572014 | DCC       | 1630   | TRUE  | 0.58(0.41-0.83) | 0.003 | 0.02 | 0  |
| cg04588079 | HEBP1     | 50865  | TRUE  | 0.6(0.43-0.84)  | 0.003 | 0.02 | 0  |
| cg12447832 | TTC15     | 51112  | TRUE  | 1.56(1.16-2.1)  | 0.003 | 0.03 | 0  |
| cg03575468 | PDHA1     | 5160   | TRUE  | 1.57(1.17-2.12) | 0.003 | 0.03 | 0  |
| cg17603184 | C22orf5   | 25829  | TRUE  | 1.75(1.22-2.52) | 0.003 | 0.03 | 0  |
| cg05342835 | SYNC1     | 81493  | FALSE | 0.62(0.45-0.86) | 0.003 | 0.03 | -1 |
| cg13351583 | SHC3      | 53358  | TRUE  | 1.71(1.2-2.45)  | 0.003 | 0.03 | 0  |
| cg19836808 | S100A7    | 6278   | FALSE | 1.58(1.17-2.13) | 0.003 | 0.03 | 0  |
| cg24516901 | FLJ22746  | 79843  | TRUE  | 0.62(0.45-0.85) | 0.003 | 0.03 | 0  |
| cg24989962 | PTGDR     | 5729   | TRUE  | 0.59(0.42-0.84) | 0.003 | 0.03 | 0  |
| cg02148834 | TPTE      | 7179   | TRUE  | 0.59(0.43-0.82) | 0.003 | 0.03 | 0  |
| cg26640549 | RAD18     | 56852  | TRUE  | 1.61(1.17-2.2)  | 0.003 | 0.03 | 0  |
| cg14378057 | KIAA0240  | 23506  | FALSE | 0.64(0.47-0.85) | 0.003 | 0.03 | 0  |
| cg17029168 | NKX2-2    | 4821   | TRUE  | 0.61(0.43-0.84) | 0.003 | 0.03 | 0  |
| cg00155485 | THRAP2    | 23389  | TRUE  | 1.62(1.18-2.24) | 0.003 | 0.03 | 0  |
| cg08697285 | MYCBP2    | 23077  | TRUE  | 1.75(1.21-2.54) | 0.003 | 0.03 | 0  |
| cg14336578 | LETM2     | 137994 | TRUE  | 1.59(1.17-2.16) | 0.003 | 0.03 | 0  |
| cg19219366 | TRIM3     | 10612  | TRUE  | 0.62(0.44-0.85) | 0.003 | 0.03 | -1 |
| cg24691461 | C20orf160 | 140706 | FALSE | 1.62(1.17-2.25) | 0.003 | 0.03 | 0  |
| cg08908355 | HIST2H2AC | 8338   | TRUE  | 1.64(1.18-2.27) | 0.003 | 0.03 | 0  |
| cg17550582 | SLC2A10   | 81031  | TRUE  | 0.61(0.44-0.85) | 0.003 | 0.03 | 0  |
| cg04137128 | SIN3A     | 25942  | TRUE  | 1.67(1.19-2.35) | 0.003 | 0.03 | 0  |
| cg22836229 | EFCAB1    | 79645  | TRUE  | 0.61(0.45-0.85) | 0.003 | 0.03 | 0  |
| cg11373429 | ICAM5     | 7087   | TRUE  | 1.66(1.18-2.35) | 0.003 | 0.03 | 0  |
| cg16536918 | AVP       | 551    | FALSE | 0.64(0.47-0.86) | 0.003 | 0.03 | 0  |

SuppTable2.txt

|            |           |        |       |                 |       |      |    |
|------------|-----------|--------|-------|-----------------|-------|------|----|
| cg03891319 | ACY1      | 95     | TRUE  | 0.6(0.42-0.85)  | 0.003 | 0.03 | -1 |
| cg11189837 | ADAMTS1   | 9510   | TRUE  | 0.63(0.46-0.86) | 0.003 | 0.03 | 0  |
| cg00948524 | RNF135    | 84282  | TRUE  | 0.6(0.43-0.83)  | 0.003 | 0.03 | 0  |
| cg21750545 | DCUN1D4   | 23142  | TRUE  | 1.57(1.17-2.12) | 0.003 | 0.03 | 0  |
| cg02125271 | SNURF     | 8926   | TRUE  | 1.79(1.22-2.63) | 0.003 | 0.03 | 0  |
| cg02657721 | SEMA3B    | 7869   | FALSE | 1.61(1.18-2.19) | 0.003 | 0.03 | 0  |
| cg15379633 | RAB36     | 9609   | TRUE  | 0.63(0.46-0.85) | 0.003 | 0.03 | 0  |
| cg18984151 | TMEM103   | 54859  | TRUE  | 1.64(1.18-2.28) | 0.003 | 0.03 | 0  |
| cg12762680 | PSMB9     | 5698   | TRUE  | 1.61(1.18-2.21) | 0.003 | 0.03 | 0  |
| cg19831077 | LOC349136 | 349136 | TRUE  | 0.63(0.47-0.85) | 0.003 | 0.03 | 0  |
| cg03634997 | GAS8      | 2622   | TRUE  | 0.63(0.46-0.86) | 0.003 | 0.03 | 0  |
| cg18919097 | C3orf57   | 165679 | TRUE  | 0.63(0.46-0.85) | 0.003 | 0.03 | 0  |
| cg10663017 | DUSP23    | 54935  | TRUE  | 1.64(1.18-2.27) | 0.003 | 0.03 | 0  |
| cg10037068 | WASPIP    | 7456   | FALSE | 1.57(1.16-2.13) | 0.003 | 0.03 | 0  |
| cg12072803 | JMJD2B    | 23030  | TRUE  | 0.64(0.48-0.86) | 0.003 | 0.03 | 0  |
| cg23196831 | COL14A1   | 7373   | TRUE  | 0.58(0.41-0.83) | 0.003 | 0.03 | 0  |
| cg05684195 | CIDEC     | 63924  | FALSE | 1.72(1.2-2.46)  | 0.003 | 0.03 | 0  |
| cg17347253 | MEST      | 4232   | TRUE  | 0.61(0.44-0.85) | 0.003 | 0.03 | 0  |
| cg08317263 | CCDC69    | 26112  | TRUE  | 1.67(1.2-2.34)  | 0.003 | 0.03 | 0  |
| cg03554552 | PPP1R13L  | 10848  | TRUE  | 0.61(0.45-0.84) | 0.003 | 0.03 | 0  |
| cg17063201 | HCRT2     | 3062   | FALSE | 0.63(0.47-0.86) | 0.003 | 0.03 | 0  |
| cg03742272 | ALOX12B   | 242    | FALSE | 1.57(1.16-2.13) | 0.003 | 0.03 | 0  |
| cg11516606 | TDRD7     | 23424  | TRUE  | 0.64(0.47-0.86) | 0.003 | 0.03 | 0  |
| cg02157306 | ELMOD2    | 255520 | TRUE  | 1.58(1.16-2.14) | 0.003 | 0.03 | 0  |
| cg02057157 | CNO       | 55330  | TRUE  | 1.62(1.17-2.25) | 0.003 | 0.03 | 0  |
| cg14973995 | TETRA     | 10227  | TRUE  | 0.63(0.46-0.86) | 0.003 | 0.03 | 0  |
| cg03986640 | MIP       | 4284   | FALSE | 1.6(1.17-2.17)  | 0.003 | 0.03 | 0  |

SupplTable2.txt

|            |             |        |       |                 |       |      |    |
|------------|-------------|--------|-------|-----------------|-------|------|----|
| cg10058540 | DCTN2       | 10540  | TRUE  | 1.64(1.18-2.27) | 0.003 | 0.03 | 0  |
| cg11902458 | KCNN3       | 3782   | FALSE | 0.57(0.4-0.83)  | 0.003 | 0.03 | 0  |
| cg06415153 | PITPNM2     | 57605  | FALSE | 0.52(0.33-0.81) | 0.003 | 0.03 | 0  |
| cg12460541 | ITPKA       | 3706   | TRUE  | 1.69(1.2-2.37)  | 0.003 | 0.03 | 0  |
| cg01493517 | HOM-TE5-103 | 25900  | TRUE  | 1.63(1.19-2.24) | 0.003 | 0.03 | 0  |
| cg12343082 | CASA        | 763    | FALSE | 1.6(1.17-2.2)   | 0.003 | 0.03 | 0  |
| cg04244987 | NCKIPSD     | 51517  | TRUE  | 1.74(1.22-2.47) | 0.003 | 0.03 | 0  |
| cg25824226 | EBAG9       | 9166   | TRUE  | 1.61(1.17-2.21) | 0.003 | 0.03 | 0  |
| cg19063972 | SOX21       | 11166  | TRUE  | 0.63(0.47-0.86) | 0.003 | 0.03 | 0  |
| cg15787039 | SGNE1       | 6447   | TRUE  | 0.63(0.47-0.86) | 0.003 | 0.03 | 0  |
| cg09313439 | CDH2        | 1000   | TRUE  | 0.6(0.44-0.83)  | 0.003 | 0.03 | 0  |
| cg23488190 | POLR2J2     | 246721 | TRUE  | 1.58(1.17-2.15) | 0.003 | 0.03 | 0  |
| cg24121001 | TTC16       | 158248 | TRUE  | 1.73(1.2-2.5)   | 0.003 | 0.03 | 0  |
| cg00245878 | H-pik       | 51351  | FALSE | 0.6(0.42-0.84)  | 0.003 | 0.03 | 0  |
| cg13840968 | CIDEB       | 27141  | TRUE  | 0.65(0.48-0.87) | 0.003 | 0.03 | -1 |
| cg00043080 | PLD3        | 23646  | TRUE  | 0.63(0.47-0.86) | 0.003 | 0.03 | 0  |
| cg06148264 | SERPINB1    | 1992   | TRUE  | 0.63(0.46-0.86) | 0.003 | 0.03 | 0  |
| cg23591869 | FLJ45803    | 399948 | TRUE  | 0.59(0.41-0.84) | 0.003 | 0.03 | 0  |
| cg20089715 | CACNB1      | 782    | FALSE | 0.59(0.42-0.84) | 0.003 | 0.03 | 0  |
| cg14360917 | SP2         | 6668   | FALSE | 1.61(1.17-2.21) | 0.003 | 0.03 | 0  |
| cg09432376 | APOL6       | 80830  | FALSE | 1.55(1.16-2.09) | 0.003 | 0.03 | 0  |
| cg04446579 | ANKRD45     | 339416 | TRUE  | 0.56(0.37-0.83) | 0.003 | 0.03 | 0  |
| cg04275881 | SLAMF8      | 56833  | FALSE | 0.62(0.45-0.86) | 0.003 | 0.03 | 0  |
| cg00514895 | CPZ         | 8532   | TRUE  | 0.52(0.34-0.81) | 0.003 | 0.03 | 0  |
| cg13699808 | PRKCBP1     | 23613  | FALSE | 1.59(1.16-2.17) | 0.003 | 0.03 | 0  |
| cg18017908 | C17orf76    | 388341 | FALSE | 0.65(0.49-0.87) | 0.003 | 0.03 | 0  |
| cg07789083 | GPRC5C      | 55890  | TRUE  | 0.63(0.46-0.85) | 0.003 | 0.03 | 0  |

SupplTable2.txt

|            |          |        |       |                 |       |      |   |
|------------|----------|--------|-------|-----------------|-------|------|---|
| cg05955224 | CR12     | 163126 | TRUE  | 1.69(1.19-2.41) | 0.003 | 0.03 | 0 |
| cg21554249 | SUOX     | 6821   | FALSE | 1.62(1.17-2.26) | 0.003 | 0.03 | 0 |
| cg24712395 | CAPN12   | 147968 | TRUE  | 0.58(0.4-0.84)  | 0.003 | 0.03 | 0 |
| cg15456206 | ZNF580   | 51157  | TRUE  | 0.62(0.45-0.85) | 0.003 | 0.03 | 0 |
| cg04437590 | NDUFAS   | 4698   | TRUE  | 1.79(1.22-2.62) | 0.003 | 0.03 | 0 |
| cg23704703 | C21orf13 | 150082 | FALSE | 0.64(0.47-0.86) | 0.003 | 0.03 | 0 |
| cg21085553 | PARP8    | 79668  | TRUE  | 1.6(1.17-2.19)  | 0.003 | 0.03 | 0 |
| cg25667202 | RPS27    | 6232   | TRUE  | 1.74(1.2-2.53)  | 0.003 | 0.03 | 0 |
| cg08432727 | SOX11    | 6664   | TRUE  | 0.59(0.42-0.83) | 0.003 | 0.03 | 0 |
| cg16777782 | CDH13    | 1012   | TRUE  | 0.63(0.46-0.86) | 0.003 | 0.03 | 0 |
| cg07297178 | CEACAM7  | 1087   | FALSE | 1.66(1.19-2.33) | 0.003 | 0.03 | 0 |
| cg24477567 | EPOR     | 2057   | FALSE | 0.61(0.44-0.85) | 0.003 | 0.03 | 0 |
| cg06784339 | MKRN1    | 23608  | TRUE  | 1.93(1.27-2.94) | 0.003 | 0.03 | 0 |
| cg24789424 | BDH      | 622    | FALSE | 2.1(1.29-3.42)  | 0.003 | 0.03 | 0 |
| cg22066521 | ABCB5    | 340273 | FALSE | 0.58(0.41-0.84) | 0.003 | 0.03 | 0 |
| cg23392730 | CHCHD1   | 118487 | TRUE  | 1.64(1.17-2.29) | 0.003 | 0.03 | 1 |
| cg20304401 | PABPC1   | 26986  | TRUE  | 1.59(1.16-2.18) | 0.003 | 0.03 | 0 |
| cg25882366 | HOXB2    | 3212   | TRUE  | 0.62(0.46-0.85) | 0.003 | 0.03 | 0 |
| cg09182986 | CAP1     | 10487  | TRUE  | 1.61(1.17-2.23) | 0.003 | 0.03 | 0 |
| cg04956511 | PTPN6    | 5777   | TRUE  | 0.59(0.42-0.85) | 0.003 | 0.03 | 0 |
| cg03503905 | TAF4     | 6874   | TRUE  | 1.63(1.17-2.26) | 0.003 | 0.03 | 0 |
| cg01708236 | NFKBIE   | 4794   | TRUE  | 1.69(1.18-2.42) | 0.003 | 0.03 | 0 |
| cg22362636 | TNIP2    | 79155  | TRUE  | 0.63(0.46-0.86) | 0.003 | 0.03 | 0 |
| cg08293367 | YPEL1    | 29799  | TRUE  | 1.62(1.18-2.21) | 0.003 | 0.03 | 0 |
| cg12845808 | PCDH12   | 51294  | FALSE | 0.64(0.48-0.87) | 0.003 | 0.03 | 0 |
| cg07786760 | DCHS2    | 54798  | TRUE  | 0.64(0.47-0.86) | 0.003 | 0.03 | 0 |
| cg26106720 | STX12    | 23673  | FALSE | 0.59(0.41-0.84) | 0.003 | 0.03 | 0 |

SuppTable2.txt

|            |          |        |       |                 |       |      |    |
|------------|----------|--------|-------|-----------------|-------|------|----|
| cg05221264 | ELA2A    | 63036  | FALSE | 2.51(1.35-4.68) | 0.003 | 0.03 | 0  |
| cg01369413 | UBQLN3   | 50613  | FALSE | 1.56(1.15-2.11) | 0.003 | 0.03 | 0  |
| cg21069922 | ERAL1    | 26284  | TRUE  | 1.54(1.15-2.07) | 0.003 | 0.03 | 0  |
| cg06933965 | CMKLR1   | 1240   | FALSE | 0.63(0.46-0.87) | 0.003 | 0.03 | -1 |
| cg16176379 | AYTL1    | 54947  | TRUE  | 0.62(0.45-0.86) | 0.003 | 0.03 | 0  |
| cg08023751 | MERTK    | 10461  | TRUE  | 0.66(0.49-0.88) | 0.003 | 0.03 | 0  |
| cg14802310 | TUBA3    | 7846   | TRUE  | 1.57(1.15-2.13) | 0.003 | 0.03 | 0  |
| cg26815021 | SFRS2    | 6427   | TRUE  | 1.85(1.23-2.8)  | 0.003 | 0.03 | 0  |
| cg12385643 | UGT1A6   | 54578  | FALSE | 1.63(1.17-2.27) | 0.003 | 0.03 | 0  |
| cg19994834 | GRIA3    | 2892   | TRUE  | 1.55(1.15-2.1)  | 0.003 | 0.03 | 0  |
| cg23316360 | EDNRB    | 1910   | TRUE  | 0.58(0.41-0.83) | 0.003 | 0.03 | 0  |
| cg08054038 | PVRL2    | 5819   | TRUE  | 1.74(1.2-2.53)  | 0.003 | 0.03 | 0  |
| cg06738602 | PTGER2   | 5732   | TRUE  | 0.61(0.43-0.85) | 0.003 | 0.03 | 0  |
| cg13297960 | NCAM2    | 4685   | TRUE  | 0.62(0.45-0.85) | 0.003 | 0.03 | 0  |
| cg00620857 | ACOT4    | 122970 | TRUE  | 0.63(0.46-0.86) | 0.003 | 0.03 | 0  |
| cg23813564 | MAGEC2   | 51438  | TRUE  | 0.64(0.48-0.86) | 0.003 | 0.03 | 0  |
| cg07440877 | FLJ46358 | 400110 | FALSE | 1.59(1.16-2.19) | 0.003 | 0.03 | 0  |
| cg10586756 | NUP93    | 9688   | TRUE  | 0.58(0.41-0.84) | 0.003 | 0.03 | 0  |
| cg21846488 | LCE4A    | 199834 | TRUE  | 1.59(1.17-2.18) | 0.003 | 0.03 | 0  |
| cg16434546 | SDCCAG10 | 10283  | TRUE  | 1.73(1.2-2.51)  | 0.003 | 0.03 | 0  |
| cg24820250 | CLEC2A   | 387836 | FALSE | 0.6(0.42-0.84)  | 0.003 | 0.03 | 0  |
| cg15869642 | CBLN1    | 869    | FALSE | 0.61(0.44-0.86) | 0.003 | 0.03 | 0  |
| cg17142470 | SORBS3   | 10174  | TRUE  | 0.59(0.41-0.85) | 0.004 | 0.03 | -1 |
| cg04531254 | MGC17839 | 219902 | TRUE  | 0.63(0.46-0.86) | 0.004 | 0.03 | 0  |
| cg06475327 | CEACAM8  | 1088   | FALSE | 0.61(0.44-0.85) | 0.004 | 0.03 | 0  |
| cg21140292 | SMARCA2  | 6595   | TRUE  | 1.6(1.16-2.19)  | 0.004 | 0.03 | 0  |
| cg25088874 | BMPRI1B  | 658    | TRUE  | 0.61(0.44-0.84) | 0.004 | 0.03 | 0  |

SupplTable2.txt

|            |           |        |       |                 |       |      |    |
|------------|-----------|--------|-------|-----------------|-------|------|----|
| cg16220183 | SEPT4     | 5414   | TRUE  | 0.57(0.39-0.83) | 0.004 | 0.03 | 0  |
| cg14261309 | C1orf163  | 65260  | TRUE  | 1.57(1.16-2.13) | 0.004 | 0.03 | 0  |
| cg23984130 |           | 28905  | FALSE | 1.7(1.19-2.43)  | 0.004 | 0.03 | 0  |
| cg24063382 | MAS1L     | 116511 | FALSE | 1.63(1.17-2.27) | 0.004 | 0.03 | 0  |
| cg18342900 | LOC388272 | 388272 | TRUE  | 1.68(1.19-2.39) | 0.004 | 0.03 | 0  |
| cg21602160 | AOC3      | 8639   | FALSE | 1.57(1.16-2.12) | 0.004 | 0.03 | 0  |
| cg16879596 | CYP3A5    | 1577   | FALSE | 1.64(1.17-2.29) | 0.004 | 0.03 | 0  |
| cg22088594 | FAM48A    | 55578  | TRUE  | 1.63(1.17-2.26) | 0.004 | 0.03 | 0  |
| cg27033479 | TMEM44    | 93109  | TRUE  | 0.62(0.44-0.86) | 0.004 | 0.03 | -1 |
| cg26499286 | KRTAP17-1 | 83902  | TRUE  | 1.55(1.15-2.08) | 0.004 | 0.03 | 0  |
| cg04926244 | FLJ32894  | 144360 | TRUE  | 0.65(0.49-0.87) | 0.004 | 0.03 | 0  |
| cg14383135 | NPAS2     | 4862   | TRUE  | 0.57(0.39-0.83) | 0.004 | 0.03 | 0  |
| cg18555206 | SLC38A6   | 145389 | TRUE  | 2.21(1.32-3.7)  | 0.004 | 0.03 | 0  |
| cg06781209 | FADS2     | 9415   | TRUE  | 0.64(0.48-0.87) | 0.004 | 0.03 | 0  |
| cg23303074 | LRAT      | 9227   | TRUE  | 0.64(0.47-0.87) | 0.004 | 0.03 | 0  |
| cg09053680 | UTF1      | 8433   | TRUE  | 0.59(0.42-0.84) | 0.004 | 0.03 | 0  |
| cg05837075 | ERO1L     | 30001  | TRUE  | 1.59(1.16-2.18) | 0.004 | 0.03 | 0  |
| cg07204803 | ARL13B    | 200894 | TRUE  | 0.61(0.44-0.86) | 0.004 | 0.03 | 0  |
| cg13474750 | SH3BP1    | 23616  | FALSE | 1.64(1.18-2.29) | 0.004 | 0.03 | 0  |
| cg08722720 | AVEN      | 57099  | TRUE  | 0.61(0.43-0.85) | 0.004 | 0.03 | 0  |
| cg14213992 | ZNF546    | 339327 | TRUE  | 0.62(0.45-0.86) | 0.004 | 0.03 | 0  |
| cg14123992 | APOE      | 348    | FALSE | 0.62(0.45-0.86) | 0.004 | 0.03 | -1 |
| cg20691580 | APOC3     | 345    | FALSE | 1.6(1.16-2.19)  | 0.004 | 0.03 | 0  |
| cg25355803 | MARVELD1  | 83742  | FALSE | 0.63(0.46-0.87) | 0.004 | 0.03 | 0  |
| cg19234089 | SART1     | 9092   | TRUE  | 0.6(0.42-0.84)  | 0.004 | 0.03 | 0  |
| cg19572242 | IRAK1     | 3654   | TRUE  | 1.63(1.17-2.26) | 0.004 | 0.03 | 0  |
| cg13859478 | CANX      | 821    | TRUE  | 1.55(1.15-2.09) | 0.004 | 0.03 | 0  |

SuppTable2.txt

|            |            |        |       |                 |       |      |   |
|------------|------------|--------|-------|-----------------|-------|------|---|
| cg15312298 | FAM84B     | 157638 | TRUE  | 1.61(1.17-2.22) | 0.004 | 0.03 | 0 |
| cg16529592 | RUNX3      | 864    | FALSE | 1.59(1.16-2.18) | 0.004 | 0.03 | 0 |
| cg23214764 | PRSS23     | 11098  | TRUE  | 0.57(0.39-0.84) | 0.004 | 0.03 | 0 |
| cg22267466 | TRIM49     | 57093  | FALSE | 0.6(0.42-0.85)  | 0.004 | 0.03 | 0 |
| cg14563260 | EDG2       | 1902   | TRUE  | 0.63(0.46-0.86) | 0.004 | 0.03 | 0 |
| cg19764436 | GNAZ       | 2781   | TRUE  | 0.63(0.46-0.86) | 0.004 | 0.03 | 0 |
| cg21388029 | CREG2      | 200407 | TRUE  | 0.63(0.47-0.86) | 0.004 | 0.03 | 0 |
| cg01078434 | MAS1L      | 116511 | FALSE | 1.81(1.21-2.69) | 0.004 | 0.03 | 0 |
| cg25564800 | KPNA1      | 3836   | TRUE  | 1.61(1.18-2.21) | 0.004 | 0.03 | 0 |
| cg11340260 | GP1BA      | 2811   | FALSE | 0.65(0.48-0.88) | 0.004 | 0.03 | 0 |
| cg20247048 | FLJ32065   | 201283 | TRUE  | 1.69(1.18-2.42) | 0.004 | 0.03 | 0 |
| cg15683743 | SPL2A      | 84888  | TRUE  | 1.61(1.17-2.22) | 0.004 | 0.03 | 0 |
| cg26200585 | PRX        | 57716  | FALSE | 0.61(0.43-0.85) | 0.004 | 0.03 | 0 |
| cg05131524 | ADAM22     | 53616  | TRUE  | 1.57(1.16-2.12) | 0.004 | 0.03 | 0 |
| cg03305230 | RAI1       | 10743  | TRUE  | 1.71(1.19-2.44) | 0.004 | 0.03 | 0 |
| cg23671708 | TMEM88     | 92162  | TRUE  | 0.62(0.45-0.85) | 0.004 | 0.03 | 0 |
| cg06192753 | GADD45GIP1 | 90480  | TRUE  | 1.63(1.17-2.26) | 0.004 | 0.03 | 0 |
| cg26767897 | XDH        | 7498   | FALSE | 0.65(0.48-0.87) | 0.004 | 0.03 | 0 |
| cg25680829 | LHX4       | 89884  | TRUE  | 0.64(0.47-0.87) | 0.004 | 0.03 | 0 |
| cg01767116 | FBXL22     | 283807 | FALSE | 1.58(1.16-2.15) | 0.004 | 0.03 | 0 |
| cg25368212 | SSX1       | 6756   | FALSE | 0.63(0.46-0.87) | 0.004 | 0.03 | 0 |
| cg08554114 | ERO1L      | 30001  | TRUE  | 0.65(0.49-0.88) | 0.004 | 0.03 | 0 |
| cg03379131 | ADAM15     | 8751   | TRUE  | 0.63(0.46-0.87) | 0.004 | 0.03 | 0 |
| cg22960952 | FLJ23657   | 152816 | FALSE | 1.57(1.15-2.15) | 0.004 | 0.03 | 0 |
| cg05439318 | CYB5-M     | 80777  | TRUE  | 0.57(0.39-0.83) | 0.004 | 0.03 | 0 |
| cg16463460 | WT1        | 7490   | TRUE  | 1.52(1.14-2.03) | 0.004 | 0.03 | 0 |
| cg17612991 | C3         | 718    | FALSE | 0.63(0.47-0.86) | 0.004 | 0.03 | 0 |

SuppTable2.txt

|            |           |        |       |                 |       |      |   |
|------------|-----------|--------|-------|-----------------|-------|------|---|
| cg06957329 | MRPS23    | 51649  | TRUE  | 1.56(1.16-2.11) | 0.004 | 0.03 | 0 |
| cg08826863 | VEGF      | 7422   | TRUE  | 1.59(1.16-2.2)  | 0.004 | 0.03 | 0 |
| cg12078929 | SERHL     | 94009  | TRUE  | 0.55(0.37-0.82) | 0.004 | 0.03 | 0 |
| cg14972271 | CAPN2     | 824    | TRUE  | 1.61(1.17-2.24) | 0.004 | 0.03 | 0 |
| cg21296602 | JOSD3     | 79101  | FALSE | 0.63(0.46-0.87) | 0.004 | 0.03 | 0 |
| cg19889780 | SPR       | 6697   | TRUE  | 1.56(1.15-2.11) | 0.004 | 0.03 | 0 |
| cg14209518 | NNMT      | 4837   | FALSE | 1.68(1.18-2.39) | 0.004 | 0.03 | 0 |
| cg00098162 | ANKRD22   | 118932 | FALSE | 0.64(0.47-0.87) | 0.004 | 0.03 | 0 |
| cg15453943 | RAB9P1    | 9366   | FALSE | 0.64(0.47-0.87) | 0.004 | 0.03 | 0 |
| cg08634464 | LOC126295 | 126295 | TRUE  | 1.54(1.15-2.08) | 0.004 | 0.03 | 0 |
| cg12789833 | FBXO22    | 26263  | TRUE  | 1.56(1.15-2.13) | 0.004 | 0.03 | 0 |
| cg00138126 | TMEPAI    | 56937  | FALSE | 0.63(0.46-0.86) | 0.004 | 0.03 | 0 |
| cg13755070 | FLI1      | 2313   | TRUE  | 1.56(1.15-2.12) | 0.004 | 0.03 | 0 |
| cg15868302 | FOXD2     | 2306   | TRUE  | 0.62(0.46-0.85) | 0.004 | 0.03 | 0 |
| cg19944367 | RGS3      | 5998   | FALSE | 1.63(1.18-2.26) | 0.004 | 0.03 | 0 |
| cg12343638 | PCDHB12   | 56124  | FALSE | 1.6(1.16-2.2)   | 0.004 | 0.03 | 0 |
| cg03245641 | GPHA2     | 170589 | FALSE | 1.57(1.15-2.13) | 0.004 | 0.03 | 0 |
| cg12220493 | TTF1      | 7080   | TRUE  | 0.55(0.36-0.82) | 0.004 | 0.03 | 0 |
| cg20775959 | ARNT2     | 9915   | TRUE  | 0.63(0.46-0.87) | 0.004 | 0.03 | 0 |
| cg13618372 | SPTBN1    | 6711   | FALSE | 0.64(0.46-0.87) | 0.004 | 0.03 | 0 |
| cg24677780 | CA11      | 770    | FALSE | 0.64(0.47-0.86) | 0.004 | 0.03 | 0 |
| cg22620680 | SEC22L2   | 26984  | TRUE  | 1.62(1.18-2.23) | 0.004 | 0.03 | 0 |
| cg23112213 | CDC23     | 8697   | TRUE  | 1.56(1.16-2.11) | 0.004 | 0.03 | 0 |
| cg11316784 | NSD1      | 64324  | TRUE  | 0.62(0.45-0.86) | 0.004 | 0.03 | 0 |
| cg13052755 | PVT1      | 5820   | TRUE  | 0.6(0.42-0.85)  | 0.004 | 0.03 | 0 |
| cg22858308 | HIVEP2    | 3097   | FALSE | 1.59(1.15-2.2)  | 0.004 | 0.03 | 1 |
| cg15786837 | HOXB13    | 10481  | TRUE  | 0.63(0.45-0.86) | 0.004 | 0.03 | 0 |

## SupplTable2.txt

|            |          |        |       |                 |       |      |   |
|------------|----------|--------|-------|-----------------|-------|------|---|
| cg13005002 | REFL3    | 10738  | FALSE | 1.58(1.15-2.17) | 0.004 | 0.03 | 0 |
| cg13462160 | ATF4     | 468    | TRUE  | 1.67(1.18-2.37) | 0.004 | 0.03 | 0 |
| cg21638219 | PHYH2    | 26061  | TRUE  | 1.57(1.15-2.16) | 0.004 | 0.03 | 0 |
| cg12317456 | MMP2     | 4313   | TRUE  | 0.64(0.47-0.87) | 0.004 | 0.03 | 0 |
| cg06042828 | DDX28    | 55794  | FALSE | 0.63(0.46-0.86) | 0.004 | 0.03 | 0 |
| cg08124030 | TM4SF1   | 4071   | TRUE  | 0.66(0.49-0.87) | 0.004 | 0.03 | 0 |
| cg26232005 | SMOX     | 54498  | TRUE  | 1.58(1.15-2.15) | 0.004 | 0.03 | 0 |
| cg13179915 | KCNK7    | 10089  | FALSE | 1.64(1.17-2.31) | 0.004 | 0.03 | 0 |
| cg12380854 | LRRCA6   | 90506  | FALSE | 1.57(1.15-2.12) | 0.004 | 0.03 | 0 |
| cg12205230 | TPM3     | 7170   | FALSE | 0.62(0.44-0.86) | 0.004 | 0.03 | 0 |
| cg02497700 | ZNF238   | 10472  | TRUE  | 0.61(0.44-0.85) | 0.004 | 0.03 | 0 |
| cg10011232 | FKBP8    | 23770  | FALSE | 1.62(1.17-2.24) | 0.004 | 0.03 | 0 |
| cg07026910 | INPP5D   | 3635   | FALSE | 0.65(0.48-0.87) | 0.004 | 0.03 | 0 |
| cg05547500 | TXNDC2   | 84203  | FALSE | 1.59(1.16-2.19) | 0.004 | 0.03 | 0 |
| cg01459162 | PADI3    | 51702  | TRUE  | 1.59(1.15-2.18) | 0.004 | 0.03 | 0 |
| cg16041660 | PRICKLE1 | 144165 | TRUE  | 0.56(0.39-0.81) | 0.004 | 0.03 | 0 |
| cg24582500 | TXNL2    | 10539  | TRUE  | 1.79(1.22-2.63) | 0.004 | 0.03 | 0 |
| cg19327844 | APBB1    | 322    | TRUE  | 1.65(1.17-2.32) | 0.004 | 0.03 | 0 |
| cg04887278 | RWDD2    | 112611 | TRUE  | 0.64(0.47-0.87) | 0.004 | 0.03 | 0 |
| cg04057106 | C9orf48  | 347240 | FALSE | 0.66(0.49-0.88) | 0.004 | 0.03 | 0 |
| cg27462398 | C1orf181 | 54680  | FALSE | 0.6(0.43-0.85)  | 0.004 | 0.03 | 0 |
| cg12163490 | CDH11    | 1009   | TRUE  | 0.62(0.45-0.85) | 0.004 | 0.03 | 0 |
| cg14080001 | SH3PX3   | 257364 | TRUE  | 0.62(0.44-0.86) | 0.004 | 0.03 | 0 |
| cg06713098 | IGFBP3   | 3486   | TRUE  | 0.64(0.47-0.86) | 0.004 | 0.03 | 0 |
| cg13847113 | MGC24975 | 163154 | FALSE | 0.63(0.47-0.86) | 0.004 | 0.03 | 0 |
| cg26596161 | SLC26A7  | 115111 | FALSE | 1.83(1.2-2.8)   | 0.004 | 0.03 | 0 |
| cg15185794 | PADI2    | 11240  | TRUE  | 0.63(0.46-0.87) | 0.004 | 0.03 | 0 |

SuppTable2.txt

|            |          |        |       |                 |       |      |    |
|------------|----------|--------|-------|-----------------|-------|------|----|
| cg14564494 | CBR3     | 874    | FALSE | 0.63(0.46-0.87) | 0.004 | 0.03 | 0  |
| cg18195628 | MIRPL48  | 51642  | TRUE  | 1.58(1.15-2.18) | 0.004 | 0.03 | 0  |
| cg17925542 | IDH2     | 3418   | TRUE  | 0.62(0.44-0.86) | 0.004 | 0.03 | 0  |
| cg15170903 | CROP     | 51747  | TRUE  | 1.62(1.17-2.24) | 0.004 | 0.03 | 0  |
| cg07873128 | OSBPL5   | 114879 | TRUE  | 1.77(1.23-2.55) | 0.004 | 0.03 | 0  |
| cg15603885 | ABRA     | 137735 | FALSE | 0.64(0.47-0.87) | 0.004 | 0.03 | 0  |
| cg13744194 | OCLN     | 4950   | TRUE  | 0.62(0.44-0.86) | 0.004 | 0.03 | 0  |
| cg19061982 | POLR1B   | 84172  | TRUE  | 1.57(1.15-2.15) | 0.004 | 0.03 | 0  |
| cg01769037 | JARID2   | 3720   | FALSE | 2.07(1.25-3.42) | 0.004 | 0.03 | 0  |
| cg10238818 | CYYR1    | 116159 | TRUE  | 0.63(0.46-0.86) | 0.004 | 0.03 | 0  |
| cg26833169 | CALCA    | 796    | TRUE  | 1.8(1.2-2.7)    | 0.004 | 0.03 | 0  |
| cg04119538 | TOP1     | 7150   | TRUE  | 1.62(1.17-2.25) | 0.004 | 0.03 | 0  |
| cg06585027 | PIK4CB   | 5298   | TRUE  | 1.56(1.15-2.11) | 0.004 | 0.03 | 0  |
| cg03852570 | C10orf33 | 84795  | FALSE | 0.64(0.47-0.87) | 0.004 | 0.03 | 0  |
| cg14377593 | TFPI2    | 7980   | TRUE  | 0.59(0.42-0.84) | 0.004 | 0.03 | 0  |
| cg11808544 | FKBP9L   | 360132 | TRUE  | 1.61(1.17-2.23) | 0.004 | 0.03 | 0  |
| cg00884529 | BZW2     | 28969  | TRUE  | 1.58(1.16-2.15) | 0.004 | 0.03 | 0  |
| cg22019980 | RNF146   | 81847  | TRUE  | 1.69(1.17-2.44) | 0.004 | 0.03 | 0  |
| cg22296149 | AMH      | 268    | FALSE | 0.65(0.48-0.88) | 0.004 | 0.03 | 0  |
| cg02053171 | WBSCR16  | 81554  | TRUE  | 1.58(1.16-2.17) | 0.004 | 0.03 | 0  |
| cg13185177 | GP5      | 2814   | FALSE | 0.65(0.48-0.88) | 0.004 | 0.03 | -1 |
| cg15433631 | IRX2     | 153572 | TRUE  | 0.63(0.46-0.85) | 0.004 | 0.03 | 0  |
| cg17751569 | CD180    | 4064   | FALSE | 0.64(0.46-0.87) | 0.004 | 0.03 | 0  |
| cg15536242 | MIP      | 4284   | FALSE | 0.64(0.47-0.87) | 0.004 | 0.03 | 0  |
| cg20052718 | TWIST1   | 7291   | TRUE  | 0.51(0.33-0.8)  | 0.004 | 0.03 | 0  |
| cg03014628 | RAB3C    | 115827 | TRUE  | 0.65(0.49-0.87) | 0.004 | 0.03 | 0  |
| cg22837289 | MDS028   | 55846  | TRUE  | 1.57(1.15-2.15) | 0.004 | 0.03 | 0  |

SupplTable2.txt

|            |           |        |       |                 |       |      |   |
|------------|-----------|--------|-------|-----------------|-------|------|---|
| cg21096399 | MCAM      | 4162   | TRUE  | 0.64(0.48-0.87) | 0.004 | 0.03 | 0 |
| cg21973276 | SMAD6     | 4091   | TRUE  | 1.56(1.15-2.12) | 0.004 | 0.03 | 0 |
| cg14254419 | AMPD2     | 271    | TRUE  | 0.61(0.44-0.86) | 0.004 | 0.03 | 0 |
| cg04806409 | TFF3      | 7033   | FALSE | 1.63(1.17-2.28) | 0.004 | 0.03 | 0 |
| cg21307628 | URB       | 151887 | FALSE | 0.61(0.43-0.86) | 0.004 | 0.03 | 0 |
| cg02775617 | ARRHGAP12 | 94134  | TRUE  | 1.61(1.15-2.26) | 0.004 | 0.03 | 0 |
| cg00504595 | TNFRSF19  | 55504  | FALSE | 1.51(1.13-2.02) | 0.004 | 0.03 | 0 |
| cg26133068 | SLC2A11   | 66035  | TRUE  | 0.61(0.43-0.86) | 0.004 | 0.03 | 0 |
| cg02626929 | PAQR4     | 124222 | FALSE | 0.62(0.44-0.86) | 0.004 | 0.03 | 0 |
| cg27486427 | RARB      | 5915   | TRUE  | 0.61(0.44-0.86) | 0.004 | 0.03 | 0 |
| cg08136806 | KRT6E     | 286887 | FALSE | 1.54(1.14-2.07) | 0.004 | 0.03 | 0 |
| cg13060997 | CCNA1     | 8900   | TRUE  | 0.64(0.47-0.87) | 0.004 | 0.03 | 0 |
| cg01594214 | SMPDL3A   | 10924  | TRUE  | 1.64(1.17-2.29) | 0.004 | 0.03 | 0 |
| cg00888561 | WDFY2     | 115825 | TRUE  | 0.59(0.41-0.85) | 0.004 | 0.03 | 0 |
| cg23724447 | BUB3      | 9184   | TRUE  | 1.61(1.16-2.24) | 0.004 | 0.03 | 0 |
| cg06507244 | DHX32     | 55760  | FALSE | 0.64(0.46-0.87) | 0.004 | 0.03 | 0 |
| cg27303882 | PAGE2     | 203569 | TRUE  | 1.52(1.13-2.03) | 0.004 | 0.03 | 0 |
| cg07404485 | PON1      | 5444   | FALSE | 1.57(1.16-2.12) | 0.004 | 0.03 | 0 |
| cg21201109 | ANKRD25   | 25959  | FALSE | 0.66(0.5-0.88)  | 0.004 | 0.03 | 0 |
| cg13615396 | RACGAP1   | 29127  | TRUE  | 1.59(1.15-2.21) | 0.004 | 0.03 | 0 |
| cg19797376 | TAL1      | 6886   | TRUE  | 0.65(0.48-0.87) | 0.004 | 0.03 | 0 |
| cg26675382 | NUP43     | 348995 | TRUE  | 1.57(1.15-2.14) | 0.004 | 0.03 | 0 |
| cg18988110 | ATAD4     | 79170  | FALSE | 1.55(1.15-2.08) | 0.004 | 0.03 | 0 |
| cg06975499 | EZH1      | 2145   | TRUE  | 1.6(1.15-2.23)  | 0.004 | 0.03 | 0 |
| cg11414151 | ACSL1     | 2180   | TRUE  | 1.6(1.16-2.22)  | 0.004 | 0.03 | 0 |
| cg08080029 | CHD5      | 26038  | TRUE  | 0.61(0.43-0.85) | 0.004 | 0.03 | 0 |
| cg13494498 | TUBB3     | 10381  | TRUE  | 1.63(1.16-2.3)  | 0.004 | 0.03 | 0 |

SuppTable2.txt

|            |          |        |       |                 |       |      |   |
|------------|----------|--------|-------|-----------------|-------|------|---|
| cg08360728 | GPATC3   | 63906  | TRUE  | 1.8(1.19-2.71)  | 0.004 | 0.03 | 0 |
| cg04884908 | CYP26B1  | 56603  | TRUE  | 0.63(0.46-0.86) | 0.004 | 0.03 | 0 |
| cg15280964 | RBM34    | 23029  | TRUE  | 1.83(1.21-2.79) | 0.004 | 0.03 | 0 |
| cg27087809 | ACSBG1   | 23205  | FALSE | 1.54(1.14-2.08) | 0.004 | 0.03 | 0 |
| cg23042138 | HYPB     | 29072  | FALSE | 1.59(1.15-2.21) | 0.004 | 0.03 | 0 |
| cg20833786 | MIRGPRX3 | 117195 | FALSE | 0.64(0.46-0.87) | 0.004 | 0.03 | 0 |
| cg11951066 | FLJ14768 | 84922  | FALSE | 0.66(0.49-0.88) | 0.004 | 0.03 | 0 |
| cg07714374 | TCF4     | 6925   | TRUE  | 1.64(1.16-2.33) | 0.004 | 0.03 | 0 |
| cg21039631 | CD58     | 965    | TRUE  | 0.65(0.48-0.88) | 0.004 | 0.03 | 0 |
| cg15530356 | ZNF414   | 84330  | TRUE  | 0.63(0.46-0.87) | 0.004 | 0.03 | 0 |
| cg17027046 | ITPA     | 3704   | TRUE  | 1.6(1.16-2.21)  | 0.004 | 0.03 | 0 |
| cg15250507 | C1orf106 | 55765  | TRUE  | 0.63(0.46-0.86) | 0.004 | 0.03 | 0 |
| cg21111471 | FLRT1    | 23769  | FALSE | 1.71(1.18-2.49) | 0.005 | 0.03 | 0 |
| cg07496902 | ASB14    | 142686 | FALSE | 0.63(0.45-0.87) | 0.005 | 0.03 | 0 |
| cg14036856 | MGC52423 | 149466 | FALSE | 1.55(1.14-2.11) | 0.005 | 0.03 | 0 |
| cg26753137 | SIRT5    | 23408  | TRUE  | 1.56(1.14-2.13) | 0.005 | 0.03 | 0 |
| cg00557354 | ARHGFB7  | 8874   | TRUE  | 0.62(0.45-0.86) | 0.005 | 0.03 | 0 |
| cg02124291 | OR7A5    | 26659  | FALSE | 0.63(0.46-0.87) | 0.005 | 0.03 | 0 |
| cg24594997 | RBP1     | 5947   | TRUE  | 1.63(1.16-2.3)  | 0.005 | 0.03 | 0 |
| cg25724441 | KCNJ2    | 3759   | TRUE  | 0.6(0.43-0.85)  | 0.005 | 0.03 | 0 |
| cg16360372 | SPINK1   | 6690   | FALSE | 0.59(0.4-0.85)  | 0.005 | 0.03 | 0 |
| cg11270633 | IL28B    | 282617 | FALSE | 1.6(1.16-2.2)   | 0.005 | 0.03 | 0 |
| cg02148642 | RGPD5    | 84220  | FALSE | 1.62(1.16-2.25) | 0.005 | 0.03 | 0 |
| cg10159529 | IL5RA    | 3568   | FALSE | 1.57(1.14-2.16) | 0.005 | 0.03 | 0 |
| cg09985635 | PCDH1    | 5097   | TRUE  | 1.53(1.14-2.06) | 0.005 | 0.03 | 0 |
| cg14577211 | ZNF641   | 121274 | TRUE  | 1.57(1.14-2.15) | 0.005 | 0.03 | 0 |
| cg00939965 | PRRG1    | 5638   | FALSE | 0.62(0.45-0.86) | 0.005 | 0.03 | 0 |

## SuppTable2.txt

|            |         |        |       |                 |       |      |   |
|------------|---------|--------|-------|-----------------|-------|------|---|
| cg18305837 | COQ7    | 10229  | TRUE  | 1.61(1.16-2.23) | 0.005 | 0.03 | 0 |
| cg07117700 | PSMC5   | 5705   | FALSE | 0.59(0.41-0.85) | 0.005 | 0.03 | 0 |
| cg17833578 | LRRG21  | 26103  | FALSE | 1.54(1.14-2.08) | 0.005 | 0.03 | 0 |
| cg01352108 | KCNK4   | 50801  | TRUE  | 0.64(0.48-0.87) | 0.005 | 0.03 | 0 |
| cg24703623 | CLCC1   | 23155  | TRUE  | 1.71(1.18-2.47) | 0.005 | 0.03 | 0 |
| cg06060661 | MAGEA11 | 4110   | FALSE | 1.53(1.14-2.06) | 0.005 | 0.03 | 0 |
| cg05125838 | UCN2    | 90226  | FALSE | 0.66(0.49-0.88) | 0.005 | 0.03 | 0 |
| cg09721659 | TSHR    | 7253   | TRUE  | 1.52(1.13-2.04) | 0.005 | 0.03 | 0 |
| cg16046465 | FRMD5   | 84978  | TRUE  | 0.6(0.42-0.84)  | 0.005 | 0.03 | 0 |
| cg10784813 | SOC31   | 8651   | TRUE  | 1.55(1.14-2.11) | 0.005 | 0.03 | 0 |
| cg12099051 | SAMHD1  | 25939  | TRUE  | 1.63(1.17-2.28) | 0.005 | 0.03 | 0 |
| cg07326586 | UBD     | 10537  | FALSE | 1.58(1.15-2.16) | 0.005 | 0.03 | 0 |
| cg21032583 | LMLN    | 89782  | TRUE  | 0.63(0.46-0.87) | 0.005 | 0.03 | 0 |
| cg03406535 | RBP7    | 116362 | FALSE | 0.66(0.49-0.88) | 0.005 | 0.03 | 0 |
| cg07285953 | CRYBA1  | 1411   | FALSE | 0.63(0.46-0.87) | 0.005 | 0.03 | 0 |
| cg22740783 | CGREF1  | 10669  | FALSE | 0.63(0.45-0.87) | 0.005 | 0.03 | 0 |
| cg20033731 | CACNA1C | 775    | TRUE  | 0.6(0.41-0.86)  | 0.005 | 0.03 | 0 |
| cg15774153 | FGF19   | 9965   | TRUE  | 0.6(0.42-0.85)  | 0.005 | 0.03 | 0 |
| cg15764655 | SBF1    | 6305   | TRUE  | 0.65(0.48-0.88) | 0.005 | 0.03 | 0 |
| cg27257408 | ACSBG1  | 23205  | FALSE | 1.6(1.16-2.2)   | 0.005 | 0.03 | 0 |
| cg19430430 | COL5A3  | 50509  | TRUE  | 0.58(0.39-0.85) | 0.005 | 0.03 | 0 |
| cg07336230 | KIF6    | 221458 | TRUE  | 0.58(0.4-0.85)  | 0.005 | 0.03 | 0 |
| cg16882703 | PSMB6   | 5694   | TRUE  | 1.59(1.15-2.21) | 0.005 | 0.03 | 0 |
| cg24597988 | SELL    | 6402   | FALSE | 0.64(0.46-0.87) | 0.005 | 0.03 | 0 |
| cg09054876 | PECI    | 10455  | TRUE  | 1.58(1.14-2.18) | 0.005 | 0.03 | 0 |
| cg07048066 | C5orf5  | 51306  | TRUE  | 1.57(1.15-2.15) | 0.005 | 0.03 | 0 |
| cg10210238 | CDKN2B  | 1030   | TRUE  | 0.63(0.46-0.86) | 0.005 | 0.03 | 0 |

SuppTable2.txt

|            |          |        |       |                 |       |      |    |
|------------|----------|--------|-------|-----------------|-------|------|----|
| cg21303011 | THRB     | 7068   | TRUE  | 0.61(0.44-0.86) | 0.005 | 0.03 | 0  |
| cg11458974 | HMOX1    | 3162   | FALSE | 0.64(0.47-0.87) | 0.005 | 0.03 | 0  |
| cg26416466 | MEGF11   | 84465  | TRUE  | 0.59(0.4-0.85)  | 0.005 | 0.03 | 0  |
| cg25557858 | EXTL3    | 2137   | TRUE  | 1.64(1.17-2.3)  | 0.005 | 0.03 | 0  |
| cg01269795 | BTNSA3   | 10384  | FALSE | 1.58(1.15-2.16) | 0.005 | 0.03 | 0  |
| cg24392574 | CALML5   | 51806  | TRUE  | 0.63(0.46-0.87) | 0.005 | 0.03 | 0  |
| cg24468890 | HDAC1    | 3065   | TRUE  | 1.7(1.18-2.46)  | 0.005 | 0.03 | 0  |
| cg15507817 | WNNT7B   | 7477   | TRUE  | 0.61(0.43-0.86) | 0.005 | 0.04 | 0  |
| cg04556854 | FLJ35630 | 166379 | TRUE  | 1.61(1.15-2.24) | 0.005 | 0.04 | 0  |
| cg08466883 | KCTD3    | 51133  | TRUE  | 0.61(0.44-0.86) | 0.005 | 0.04 | 0  |
| cg01459453 | SELP     | 6403   | FALSE | 0.66(0.49-0.89) | 0.005 | 0.04 | 0  |
| cg26911787 | ELK3     | 2004   | TRUE  | 0.62(0.44-0.87) | 0.005 | 0.04 | 0  |
| cg19784449 | WASF2    | 10163  | TRUE  | 1.54(1.14-2.09) | 0.005 | 0.04 | 0  |
| cg16873863 | SLC22A18 | 5002   | FALSE | 0.67(0.5-0.89)  | 0.005 | 0.04 | 0  |
| cg09658342 | TIA1     | 7072   | TRUE  | 1.78(1.2-2.65)  | 0.005 | 0.04 | 0  |
| cg06913228 | UBE2J1   | 51465  | TRUE  | 1.57(1.14-2.16) | 0.005 | 0.04 | 0  |
| cg24101359 | GNMT     | 27232  | TRUE  | 0.63(0.46-0.87) | 0.005 | 0.04 | 0  |
| cg23079782 | P2RY10   | 27334  | FALSE | 1.61(1.16-2.25) | 0.005 | 0.04 | 0  |
| cg06288351 | KCNS1    | 3787   | TRUE  | 0.65(0.48-0.88) | 0.005 | 0.04 | -1 |
| cg11768886 | STK32B   | 55351  | TRUE  | 1.57(1.15-2.14) | 0.005 | 0.04 | 0  |
| cg04796162 | IGFBP3   | 3486   | TRUE  | 0.59(0.41-0.85) | 0.005 | 0.04 | 0  |
| cg15783800 | HAK      | 115701 | TRUE  | 0.64(0.47-0.87) | 0.005 | 0.04 | 0  |
| cg06598631 | ORC3L    | 23595  | TRUE  | 1.56(1.15-2.1)  | 0.005 | 0.04 | 0  |
| cg17525003 | IPIP     | 121457 | TRUE  | 1.57(1.15-2.15) | 0.005 | 0.04 | 0  |
| cg06751597 | SNAP23   | 8773   | TRUE  | 1.63(1.16-2.3)  | 0.005 | 0.04 | 0  |
| cg18979491 | LBP      | 3929   | FALSE | 1.54(1.14-2.06) | 0.005 | 0.04 | 0  |
| cg02990033 | GFRA4    | 64096  | FALSE | 0.65(0.47-0.88) | 0.005 | 0.04 | 0  |

SuppTable2.txt

|            |          |        |       |                 |       |      |   |
|------------|----------|--------|-------|-----------------|-------|------|---|
| cg00582628 | RGSS20   | 8601   | FALSE | 1.57(1.16-2.12) | 0.005 | 0.04 | 0 |
| cg05067973 | TRIB3    | 57761  | FALSE | 0.65(0.48-0.88) | 0.005 | 0.04 | 0 |
| cg16772514 | C1QL1    | 10882  | TRUE  | 0.65(0.48-0.88) | 0.005 | 0.04 | 0 |
| cg16543027 | PLCB2    | 5330   | FALSE | 0.59(0.4-0.86)  | 0.005 | 0.04 | 0 |
| cg16896647 | SYK      | 6850   | TRUE  | 0.63(0.45-0.87) | 0.005 | 0.04 | 0 |
| cg16799087 | PRDM7    | 11105  | FALSE | 1.59(1.15-2.18) | 0.005 | 0.04 | 0 |
| cg27379587 | NMB      | 4828   | TRUE  | 1.68(1.17-2.4)  | 0.005 | 0.04 | 0 |
| cg09542111 | GRIK1    | 2897   | TRUE  | 0.6(0.42-0.85)  | 0.005 | 0.04 | 0 |
| cg10276576 | C11orf24 | 53838  | TRUE  | 1.6(1.15-2.23)  | 0.005 | 0.04 | 0 |
| cg05501584 | STR3IA2  | 8128   | TRUE  | 1.56(1.14-2.14) | 0.005 | 0.04 | 0 |
| cg22012981 | ACOX2    | 8309   | FALSE | 0.62(0.44-0.87) | 0.005 | 0.04 | 0 |
| cg04891836 | TNFSF14  | 8740   | FALSE | 1.53(1.13-2.07) | 0.005 | 0.04 | 0 |
| cg09536738 | EFHD1    | 80303  | TRUE  | 1.56(1.14-2.15) | 0.005 | 0.04 | 0 |
| cg25411725 | SLC22A13 | 9390   | FALSE | 0.63(0.46-0.86) | 0.005 | 0.04 | 0 |
| cg25499099 | TNK1     | 8711   | TRUE  | 0.65(0.48-0.89) | 0.005 | 0.04 | 0 |
| cg10840135 | CYP2D6   | 1565   | FALSE | 1.57(1.15-2.15) | 0.005 | 0.04 | 0 |
| cg19844287 | MOCSS2   | 4338   | TRUE  | 0.58(0.4-0.84)  | 0.005 | 0.04 | 0 |
| cg25107791 | CLPS     | 1208   | FALSE | 1.57(1.14-2.15) | 0.005 | 0.04 | 0 |
| cg05897048 | HRASLS3  | 11145  | TRUE  | 1.58(1.17-2.15) | 0.005 | 0.04 | 0 |
| cg09027725 | COX4I2   | 84701  | FALSE | 1.62(1.16-2.27) | 0.005 | 0.04 | 0 |
| cg24133115 | PDE10A   | 10846  | TRUE  | 0.59(0.41-0.84) | 0.005 | 0.04 | 0 |
| cg01782486 | ZBTB7B   | 51043  | FALSE | 1.6(1.14-2.24)  | 0.005 | 0.04 | 0 |
| cg03404502 | GPR18    | 2841   | FALSE | 0.65(0.48-0.88) | 0.005 | 0.04 | 0 |
| cg07846220 | LAMA1    | 284217 | TRUE  | 0.63(0.46-0.86) | 0.005 | 0.04 | 0 |
| cg18951427 | ACYP2    | 98     | FALSE | 0.48(0.29-0.81) | 0.005 | 0.04 | 0 |
| cg17520176 | ZMYM4    | 9202   | TRUE  | 1.57(1.14-2.15) | 0.005 | 0.04 | 0 |
| cg00024396 | ELOVL5   | 60481  | TRUE  | 1.68(1.17-2.42) | 0.005 | 0.04 | 0 |

SupplTable2.txt

|            |           |        |       |                 |       |      |    |
|------------|-----------|--------|-------|-----------------|-------|------|----|
| cg0554936  | RAB3D     | 9545   | TRUE  | 1.54(1.14-2.07) | 0.005 | 0.04 | 0  |
| cg08474603 | CRP       | 1401   | FALSE | 0.62(0.44-0.87) | 0.005 | 0.04 | 0  |
| cg00563932 | PTGDS     | 5730   | FALSE | 0.64(0.46-0.88) | 0.005 | 0.04 | -1 |
| cg10150813 | KIAA0746  | 23231  | TRUE  | 0.64(0.47-0.87) | 0.005 | 0.04 | 0  |
| cg23001650 | B4GALT2   | 8704   | TRUE  | 0.64(0.46-0.88) | 0.005 | 0.04 | 0  |
| cg07973390 | CARF      | 55602  | TRUE  | 1.64(1.17-2.32) | 0.005 | 0.04 | 0  |
| cg01313514 | WNT3A     | 89780  | TRUE  | 0.6(0.43-0.85)  | 0.005 | 0.04 | 0  |
| cg02154074 | HTRA2     | 27429  | TRUE  | 1.52(1.13-2.05) | 0.005 | 0.04 | 0  |
| cg06403553 | PGK2      | 5232   | FALSE | 1.61(1.16-2.25) | 0.005 | 0.04 | 0  |
| cg20189782 | MGC27121  | 408263 | FALSE | 1.6(1.16-2.22)  | 0.005 | 0.04 | 0  |
| cg12204727 | COMMD4    | 54939  | TRUE  | 1.56(1.14-2.14) | 0.005 | 0.04 | 0  |
| cg17302852 | FXR1      | 8087   | TRUE  | 1.51(1.12-2.03) | 0.005 | 0.04 | 0  |
| cg04605667 | SLAH2     | 6478   | TRUE  | 1.66(1.16-2.37) | 0.005 | 0.04 | 0  |
| cg24924631 | BCL2A1    | 597    | TRUE  | 0.58(0.39-0.85) | 0.005 | 0.04 | 0  |
| cg19721889 | HAND1     | 9421   | TRUE  | 0.62(0.45-0.86) | 0.005 | 0.04 | 0  |
| cg05595345 | ARRDC4    | 91947  | TRUE  | 0.62(0.45-0.86) | 0.005 | 0.04 | 0  |
| cg01587454 | WDR21C    | 138009 | TRUE  | 0.59(0.41-0.85) | 0.005 | 0.04 | 0  |
| cg04623837 | HCG9      | 10255  | TRUE  | 0.64(0.47-0.88) | 0.005 | 0.04 | 0  |
| cg06433658 | FAM63A    | 55793  | FALSE | 0.64(0.46-0.88) | 0.005 | 0.04 | 0  |
| cg17384145 | HIST1H2AM | 8336   | TRUE  | 1.57(1.15-2.13) | 0.005 | 0.04 | 0  |
| cg02342494 | MGC50559  | 254013 | TRUE  | 1.54(1.13-2.09) | 0.005 | 0.04 | 0  |
| cg03278960 | C16orf57  | 79650  | TRUE  | 1.51(1.13-2)    | 0.005 | 0.04 | 0  |
| cg22090592 | C14orf173 | 64423  | FALSE | 0.64(0.46-0.88) | 0.005 | 0.04 | 0  |
| cg13253729 | Rgr       | 266747 | TRUE  | 0.65(0.48-0.87) | 0.005 | 0.04 | 0  |
| cg26523005 | ZNF662    | 389114 | FALSE | 0.66(0.49-0.88) | 0.005 | 0.04 | 0  |
| cg10025443 | SYK       | 6850   | TRUE  | 0.64(0.47-0.88) | 0.005 | 0.04 | 0  |
| cg11051158 | C2orf3    | 6936   | TRUE  | 1.55(1.14-2.11) | 0.005 | 0.04 | 0  |

SuppTable2.txt

|            |           |        |       |                 |       |      |    |
|------------|-----------|--------|-------|-----------------|-------|------|----|
| cg15557833 | MGCC33302 | 256471 | TRUE  | 1.72(1.17-2.52) | 0.005 | 0.04 | 0  |
| cg08452348 | CATSPER3  | 347732 | FALSE | 0.63(0.46-0.88) | 0.005 | 0.04 | 0  |
| cg02876062 | FAM107B   | 83641  | TRUE  | 1.58(1.15-2.16) | 0.005 | 0.04 | 0  |
| cg02440177 | ZNF702    | 79986  | TRUE  | 0.64(0.47-0.87) | 0.005 | 0.04 | 0  |
| cg00468146 | ID4       | 3400   | TRUE  | 0.63(0.45-0.86) | 0.005 | 0.04 | 0  |
| cg19655070 | HEXIM2    | 124790 | TRUE  | 1.61(1.15-2.26) | 0.005 | 0.04 | 0  |
| cg12893143 | UNC5A     | 90249  | TRUE  | 0.62(0.45-0.86) | 0.005 | 0.04 | 0  |
| cg23508786 | IFNGR2    | 3460   | TRUE  | 1.53(1.13-2.06) | 0.005 | 0.04 | 0  |
| cg21429500 | LAP3      | 51056  | TRUE  | 1.65(1.17-2.33) | 0.005 | 0.04 | 0  |
| cg20959866 | AJAP1     | 55966  | TRUE  | 0.57(0.38-0.84) | 0.005 | 0.04 | 0  |
| cg26571739 | VAV1      | 7409   | TRUE  | 1.69(1.18-2.43) | 0.005 | 0.04 | 0  |
| cg10107671 | FLJ45684  | 400666 | TRUE  | 1.64(1.16-2.32) | 0.005 | 0.04 | 0  |
| cg00690280 | WFDC10B   | 280664 | FALSE | 1.53(1.13-2.06) | 0.005 | 0.04 | 0  |
| cg20030671 | FBXO28    | 23219  | TRUE  | 1.53(1.15-2.04) | 0.005 | 0.04 | 0  |
| cg10035922 | C1orf102  | 127700 | TRUE  | 1.55(1.14-2.11) | 0.005 | 0.04 | 0  |
| cg08558873 | ZNF214    | 7761   | TRUE  | 0.58(0.39-0.84) | 0.005 | 0.04 | 0  |
| cg04790129 | ITGB2     | 3689   | FALSE | 0.66(0.49-0.88) | 0.005 | 0.04 | 0  |
| cg12952132 | NCR1      | 9437   | FALSE | 1.55(1.14-2.12) | 0.005 | 0.04 | 0  |
| cg17436805 | MIPEP     | 4285   | TRUE  | 1.6(1.15-2.23)  | 0.005 | 0.04 | 0  |
| cg26845300 | SNX9      | 51429  | TRUE  | 0.61(0.43-0.86) | 0.005 | 0.04 | 0  |
| cg17034109 | CYB561D1  | 284613 | TRUE  | 0.65(0.47-0.89) | 0.005 | 0.04 | -1 |
| cg26609631 | GSH1      | 219409 | TRUE  | 0.61(0.44-0.85) | 0.005 | 0.04 | 0  |
| cg16721202 | SP4       | 6671   | TRUE  | 1.59(1.14-2.2)  | 0.005 | 0.04 | 0  |
| cg08596000 | PDGFD     | 80310  | TRUE  | 0.65(0.47-0.89) | 0.005 | 0.04 | -1 |
| cg23558650 | PPME1     | 51400  | TRUE  | 1.6(1.15-2.23)  | 0.005 | 0.04 | 0  |
| cg25737491 | GABARAP   | 11337  | TRUE  | 1.59(1.14-2.22) | 0.005 | 0.04 | 0  |
| cg03440846 | ACSS2     | 55902  | FALSE | 0.64(0.47-0.89) | 0.005 | 0.04 | 0  |

SuppTable2.txt

|             |           |        |       |                 |       |      |    |
|-------------|-----------|--------|-------|-----------------|-------|------|----|
| cg188833140 | HABP2     | 3026   | FALSE | 0.65(0.48-0.89) | 0.005 | 0.04 | 0  |
| cg15379858  | ChGn      | 55790  | FALSE | 0.66(0.49-0.88) | 0.005 | 0.04 | 0  |
| cg05308617  | ARMC8     | 25852  | TRUE  | 1.54(1.13-2.1)  | 0.005 | 0.04 | 0  |
| cg09425215  | CHD2      | 1106   | TRUE  | 1.61(1.14-2.26) | 0.005 | 0.04 | 0  |
| cg24073051  | CDV3      | 55573  | TRUE  | 1.54(1.13-2.1)  | 0.005 | 0.04 | 0  |
| cg22495120  | FMRI1NB   | 158521 | TRUE  | 0.66(0.49-0.89) | 0.005 | 0.04 | 0  |
| cg04770504  | DFNA5     | 1687   | TRUE  | 0.65(0.48-0.87) | 0.005 | 0.04 | 0  |
| cg27038439  | MSX1      | 4487   | TRUE  | 0.65(0.48-0.88) | 0.005 | 0.04 | 0  |
| cg01797043  | RPL3L     | 6123   | FALSE | 0.65(0.48-0.89) | 0.005 | 0.04 | -1 |
| cg25748127  | POLR2L    | 5441   | TRUE  | 1.55(1.13-2.12) | 0.005 | 0.04 | 0  |
| cg13397379  | OR2C3     | 81472  | FALSE | 1.57(1.14-2.17) | 0.005 | 0.04 | 0  |
| cg06277277  | NR113     | 9970   | FALSE | 2.37(1.29-4.38) | 0.005 | 0.04 | 0  |
| cg13121699  | C2orf10   | 91752  | TRUE  | 0.65(0.48-0.88) | 0.005 | 0.04 | 0  |
| cg21751787  | LMAN2     | 10960  | TRUE  | 1.48(1.12-1.95) | 0.005 | 0.04 | 0  |
| cg13454184  | TARSL1    | 80222  | TRUE  | 1.56(1.14-2.14) | 0.005 | 0.04 | 0  |
| cg18003791  | GABRA3    | 2556   | FALSE | 1.54(1.13-2.1)  | 0.005 | 0.04 | 0  |
| cg04278905  | GCN5L2    | 2648   | TRUE  | 0.63(0.46-0.88) | 0.005 | 0.04 | 0  |
| cg12506373  | CAD       | 790    | TRUE  | 1.52(1.13-2.06) | 0.005 | 0.04 | 0  |
| cg05921207  | CHRD1     | 91851  | TRUE  | 1.55(1.14-2.12) | 0.006 | 0.04 | 0  |
| cg18717447  | LOC159090 | 159090 | TRUE  | 1.51(1.13-2.03) | 0.006 | 0.04 | 0  |
| cg03294491  | SMAD2     | 4087   | FALSE | 0.63(0.46-0.87) | 0.006 | 0.04 | 0  |
| cg07150830  | NOS2A     | 4843   | FALSE | 0.64(0.46-0.88) | 0.006 | 0.04 | 0  |
| cg07073964  | PRSSL1    | 400668 | TRUE  | 0.67(0.51-0.89) | 0.006 | 0.04 | 0  |
| cg16256230  | KIF4A     | 24137  | TRUE  | 1.51(1.12-2.02) | 0.006 | 0.04 | 0  |
| cg15006396  | NFKB1Z    | 64332  | TRUE  | 1.59(1.13-2.22) | 0.006 | 0.04 | 0  |
| cg01103730  | IL20      | 50604  | FALSE | 0.64(0.47-0.88) | 0.006 | 0.04 | 0  |
| cg05679613  | MEPE      | 56955  | FALSE | 0.62(0.44-0.88) | 0.006 | 0.04 | 0  |

SupplTable2.txt

|            |          |        |       |                 |       |      |    |
|------------|----------|--------|-------|-----------------|-------|------|----|
| cg17903544 | PGAM5    | 192111 | TRUE  | 0.61(0.42-0.86) | 0.006 | 0.04 | 0  |
| cg06838394 | ARFGEF2  | 10564  | TRUE  | 1.59(1.14-2.2)  | 0.006 | 0.04 | 0  |
| cg05798972 | PPARBP   | 5469   | FALSE | 1.52(1.13-2.06) | 0.006 | 0.04 | 0  |
| cg23667432 | ALPP     | 250    | TRUE  | 1.55(1.13-2.12) | 0.006 | 0.04 | 0  |
| cg06536578 | JPH4     | 84502  | FALSE | 0.61(0.43-0.87) | 0.006 | 0.04 | 0  |
| cg26778754 | SSFA2    | 6744   | TRUE  | 1.57(1.14-2.17) | 0.006 | 0.04 | 0  |
| cg22034555 | DHX36    | 170506 | TRUE  | 1.55(1.13-2.11) | 0.006 | 0.04 | 0  |
| cg20277416 | TM7SF2   | 7108   | TRUE  | 1.59(1.15-2.19) | 0.006 | 0.04 | 0  |
| cg10983208 | SPOCK2   | 9806   | TRUE  | 1.58(1.14-2.18) | 0.006 | 0.04 | 0  |
| cg03011500 | CGN      | 57530  | TRUE  | 1.58(1.14-2.19) | 0.006 | 0.04 | 0  |
| cg22396755 | RAP1GA1  | 5909   | TRUE  | 0.66(0.49-0.89) | 0.006 | 0.04 | 0  |
| cg24664861 | SPAG16   | 79582  | TRUE  | 1.55(1.13-2.13) | 0.006 | 0.04 | 0  |
| cg18015044 | ABCF1    | 23     | TRUE  | 1.58(1.14-2.18) | 0.006 | 0.04 | 0  |
| cg13850625 | FLJ11155 | 55314  | TRUE  | 0.44(0.25-0.78) | 0.006 | 0.04 | 0  |
| cg13164537 | CD226    | 10666  | FALSE | 1.51(1.12-2.02) | 0.006 | 0.04 | 1  |
| cg24890286 | HIPK2    | 28996  | FALSE | 0.61(0.43-0.87) | 0.006 | 0.04 | 0  |
| cg13226591 | MAGEB18  | 286514 | TRUE  | 0.66(0.48-0.89) | 0.006 | 0.04 | 0  |
| cg01899253 | FLT1     | 2321   | TRUE  | 0.65(0.48-0.89) | 0.006 | 0.04 | -1 |
| cg15736165 | BNC1     | 646    | TRUE  | 1.6(1.14-2.23)  | 0.006 | 0.04 | 0  |
| cg00350296 | CD248    | 57124  | FALSE | 0.66(0.49-0.89) | 0.006 | 0.04 | 0  |
| cg08749122 | TARSL1   | 80222  | TRUE  | 1.56(1.13-2.14) | 0.006 | 0.04 | 0  |
| cg09018040 | VCX      | 26609  | FALSE | 0.65(0.48-0.88) | 0.006 | 0.04 | 0  |
| cg26619317 | CNN3     | 1266   | TRUE  | 0.65(0.48-0.88) | 0.006 | 0.04 | 0  |
| cg04387658 | CD86     | 942    | TRUE  | 0.65(0.48-0.88) | 0.006 | 0.04 | 0  |
| cg17367215 | SUPT5H   | 6829   | TRUE  | 1.53(1.13-2.06) | 0.006 | 0.04 | 0  |
| cg05700681 | CCL22    | 6367   | FALSE | 1.66(1.17-2.36) | 0.006 | 0.04 | 0  |
| cg22040627 | SLC13A5  | 284111 | TRUE  | 0.64(0.47-0.88) | 0.006 | 0.04 | 0  |

## SupplTable2.txt

|             |          |        |       |                 |       |      |    |
|-------------|----------|--------|-------|-----------------|-------|------|----|
| cg193556685 | ZFAND2B  | 130617 | TRUE  | 1.62(1.15-2.26) | 0.006 | 0.04 | 0  |
| cg01720520  | LILRB1   | 10859  | FALSE | 1.54(1.13-2.11) | 0.006 | 0.04 | 0  |
| cg03065661  | CRSP6    | 9440   | TRUE  | 1.59(1.15-2.21) | 0.006 | 0.04 | 0  |
| cg27118825  | RSHL1    | 81492  | TRUE  | 0.6(0.42-0.86)  | 0.006 | 0.04 | 0  |
| cg24164563  | FOXJ1    | 2302   | TRUE  | 0.64(0.46-0.88) | 0.006 | 0.04 | 0  |
| cg24453353  | HIST1H4C | 8364   | TRUE  | 1.62(1.16-2.25) | 0.006 | 0.04 | 0  |
| cg17243643  | RDH5     | 5959   | FALSE | 0.66(0.49-0.89) | 0.006 | 0.04 | 0  |
| cg12906740  | NUDT15   | 55270  | TRUE  | 1.55(1.13-2.11) | 0.006 | 0.04 | 0  |
| cg27589921  | CIAPIN1  | 57019  | FALSE | 0.62(0.44-0.88) | 0.006 | 0.04 | 0  |
| cg25156443  | SFRP5    | 6425   | TRUE  | 1.58(1.15-2.18) | 0.006 | 0.04 | 0  |
| cg01930621  | ZNF649   | 65251  | TRUE  | 1.5(1.12-2)     | 0.006 | 0.04 | 0  |
| cg24337809  | BTG2     | 7832   | TRUE  | 1.52(1.14-2.02) | 0.006 | 0.04 | 0  |
| cg12213910  | RAET1E   | 135250 | FALSE | 1.55(1.13-2.12) | 0.006 | 0.04 | 0  |
| cg03608577  | OR12D3   | 81797  | FALSE | 1.53(1.13-2.08) | 0.006 | 0.04 | 0  |
| cg11628487  | SET      | 6418   | TRUE  | 0.66(0.49-0.89) | 0.006 | 0.04 | -1 |
| cg03343942  | SLC39A5  | 283375 | FALSE | 1.57(1.14-2.16) | 0.006 | 0.04 | 0  |
| cg18694780  | CMKOR1   | 57007  | TRUE  | 0.65(0.47-0.89) | 0.006 | 0.04 | 0  |
| cg25230532  | GALT     | 2592   | TRUE  | 1.58(1.14-2.21) | 0.006 | 0.04 | 0  |
| cg09257092  | ITPR2    | 3709   | TRUE  | 0.65(0.48-0.88) | 0.006 | 0.04 | 0  |
| cg19552482  | ZNF691   | 51058  | TRUE  | 1.62(1.16-2.27) | 0.006 | 0.04 | 0  |
| cg02580195  | RABL2A   | 11159  | TRUE  | 1.8(1.22-2.64)  | 0.006 | 0.04 | 0  |
| cg10763288  | DHCR7    | 1717   | TRUE  | 0.66(0.49-0.89) | 0.006 | 0.04 | 0  |
| cg02008169  | ZNF267   | 10308  | TRUE  | 1.61(1.15-2.27) | 0.006 | 0.04 | 0  |
| cg17100200  | GUCY2B   | 2981   | FALSE | 1.59(1.14-2.23) | 0.006 | 0.04 | 0  |
| cg17338403  | SILCO3A1 | 28232  | FALSE | 0.64(0.46-0.88) | 0.006 | 0.04 | 0  |
| cg17469479  | CLECG9A  | 283420 | TRUE  | 0.66(0.49-0.89) | 0.006 | 0.04 | 0  |
| cg21276690  | WDR58    | 79228  | FALSE | 0.65(0.48-0.89) | 0.006 | 0.04 | 0  |

SuppTable2.txt

|            |           |        |       |                 |       |      |    |
|------------|-----------|--------|-------|-----------------|-------|------|----|
| cg22563815 | CHRNA5    | 1138   | TRUE  | 0.67(0.5-0.9)   | 0.006 | 0.04 | -1 |
| cg05681757 | FGD4      | 121512 | FALSE | 0.64(0.47-0.89) | 0.006 | 0.04 | 0  |
| cg17559549 | MAPK7     | 5598   | TRUE  | 1.6(1.15-2.23)  | 0.006 | 0.04 | 0  |
| cg00881086 | NPHP3     | 27031  | TRUE  | 1.52(1.13-2.05) | 0.006 | 0.04 | 0  |
| cg11403598 | COG8      | 84342  | FALSE | 1.54(1.13-2.09) | 0.006 | 0.04 | 0  |
| cg15376097 | EVA1      | 10205  | FALSE | 0.66(0.49-0.89) | 0.006 | 0.04 | 0  |
| cg03026462 | FOXA1     | 3169   | TRUE  | 0.64(0.47-0.88) | 0.006 | 0.04 | 0  |
| cg26220985 | DPT       | 1805   | FALSE | 1.58(1.13-2.21) | 0.006 | 0.04 | 0  |
| cg05774801 | SFRP2     | 6423   | TRUE  | 1.54(1.13-2.09) | 0.006 | 0.04 | 0  |
| cg13003163 | ANP32D    | 23519  | TRUE  | 0.59(0.41-0.85) | 0.006 | 0.04 | 0  |
| cg10100220 | LNK2      | 222484 | FALSE | 0.63(0.45-0.88) | 0.006 | 0.04 | 0  |
| cg23391006 | OXTR      | 5021   | TRUE  | 0.64(0.46-0.88) | 0.006 | 0.04 | 0  |
| cg13159566 | CCDC59    | 29080  | TRUE  | 0.64(0.47-0.89) | 0.006 | 0.04 | -1 |
| cg04826883 | CA12      | 771    | TRUE  | 1.64(1.16-2.31) | 0.006 | 0.04 | 0  |
| cg08251399 | EHD3      | 30845  | TRUE  | 0.65(0.48-0.88) | 0.006 | 0.04 | 0  |
| cg15062535 | ZNF610    | 162963 | FALSE | 1.58(1.14-2.21) | 0.006 | 0.04 | 0  |
| cg07664027 | RPL13A    | 23521  | TRUE  | 0.61(0.43-0.87) | 0.006 | 0.04 | 0  |
| cg26259865 | LOC124220 | 124220 | FALSE | 0.64(0.46-0.89) | 0.006 | 0.04 | 0  |
| cg23326197 | CYP3A4    | 1576   | FALSE | 1.49(1.12-1.98) | 0.006 | 0.04 | 0  |
| cg15559700 | UGT1A9    | 54600  | FALSE | 0.64(0.47-0.88) | 0.006 | 0.04 | 0  |
| cg11203041 | MGST1     | 4257   | FALSE | 0.66(0.49-0.89) | 0.006 | 0.04 | 0  |
| cg11158729 | CNNM4     | 26504  | TRUE  | 0.62(0.44-0.88) | 0.006 | 0.04 | 0  |
| cg23765993 | SPINLW1   | 57119  | FALSE | 1.52(1.12-2.05) | 0.006 | 0.04 | 0  |
| cg21164303 | TMED3     | 23423  | TRUE  | 0.66(0.49-0.89) | 0.006 | 0.04 | 0  |
| cg07843027 | LOC124491 | 124491 | TRUE  | 1.54(1.13-2.11) | 0.006 | 0.04 | 0  |
| cg02930996 | B4GALT6   | 9331   | TRUE  | 0.61(0.44-0.86) | 0.006 | 0.04 | 0  |
| cg09371142 | DCUN1D3   | 123879 | TRUE  | 1.58(1.14-2.19) | 0.006 | 0.04 | 0  |

SuppTable2.txt

|            |          |        |       |                 |       |      |   |
|------------|----------|--------|-------|-----------------|-------|------|---|
| cg05112986 | SUP13H   | 8464   | TRUE  | 1.55(1.13-2.14) | 0.006 | 0.04 | 0 |
| cg04418492 | CYP7B1   | 9420   | TRUE  | 0.64(0.47-0.88) | 0.006 | 0.04 | 0 |
| cg05826823 | CIZ1     | 25792  | FALSE | 0.67(0.5-0.89)  | 0.006 | 0.04 | 0 |
| cg09421562 | MPO      | 4353   | FALSE | 0.66(0.49-0.89) | 0.006 | 0.04 | 0 |
| cg05521696 | SLC2A14  | 144195 | TRUE  | 0.6(0.42-0.86)  | 0.006 | 0.04 | 0 |
| cg11745019 | ANGPT1   | 284    | TRUE  | 1.63(1.14-2.33) | 0.006 | 0.04 | 0 |
| cg07897701 | ABP1     | 26     | FALSE | 0.67(0.5-0.89)  | 0.006 | 0.04 | 0 |
| cg00746130 | BAT5     | 7920   | TRUE  | 1.51(1.12-2.04) | 0.006 | 0.04 | 0 |
| cg05512756 | UGT3A1   | 133688 | FALSE | 1.54(1.13-2.1)  | 0.006 | 0.04 | 0 |
| cg24287460 | CCDC48   | 79825  | TRUE  | 1.56(1.14-2.14) | 0.006 | 0.04 | 0 |
| cg13287780 | WRB      | 7485   | TRUE  | 0.63(0.45-0.88) | 0.006 | 0.04 | 0 |
| cg12400881 | PPL      | 5493   | TRUE  | 0.67(0.5-0.89)  | 0.006 | 0.04 | 0 |
| cg02164386 | HIGD1B   | 51751  | FALSE | 0.64(0.46-0.88) | 0.006 | 0.04 | 0 |
| cg25946952 | KIAA0773 | 9715   | TRUE  | 1.73(1.16-2.56) | 0.006 | 0.04 | 0 |
| cg19423196 | MAT1A    | 4143   | FALSE | 1.51(1.12-2.03) | 0.006 | 0.04 | 0 |
| cg08285151 | HDAC9    | 9734   | FALSE | 1.55(1.13-2.13) | 0.006 | 0.04 | 0 |
| cg20240860 | PHACS    | 84680  | TRUE  | 1.56(1.15-2.12) | 0.006 | 0.04 | 0 |
| cg10633491 | ZBTB7A   | 51341  | TRUE  | 1.52(1.12-2.06) | 0.006 | 0.04 | 0 |
| cg23504707 | PPM1A    | 5494   | FALSE | 0.65(0.47-0.88) | 0.006 | 0.04 | 0 |
| cg15696627 | MSX1     | 4487   | TRUE  | 0.59(0.41-0.86) | 0.006 | 0.04 | 0 |
| cg27377213 | PPP1R16B | 26051  | TRUE  | 1.49(1.12-2)    | 0.006 | 0.04 | 0 |
| cg26293512 | TEPP     | 374739 | FALSE | 1.57(1.13-2.17) | 0.006 | 0.04 | 0 |
| cg01109219 | RASGRP3  | 25780  | TRUE  | 1.62(1.16-2.26) | 0.006 | 0.04 | 0 |
| cg19286986 | GPR162   | 27239  | TRUE  | 1.62(1.15-2.27) | 0.006 | 0.04 | 0 |
| cg02425732 | RRBP1    | 6238   | TRUE  | 0.61(0.43-0.87) | 0.006 | 0.04 | 0 |
| cg20122476 | PITPNA   | 5306   | TRUE  | 1.56(1.15-2.11) | 0.006 | 0.04 | 0 |
| cg25141995 | VDAC1    | 7416   | TRUE  | 0.66(0.49-0.89) | 0.006 | 0.04 | 0 |

SuppTable2.txt

|            |                |        |       |                 |       |      |    |
|------------|----------------|--------|-------|-----------------|-------|------|----|
| cg04268405 | CHST3          | 9469   | TRUE  | 0.67(0.5-0.9)   | 0.006 | 0.04 | 0  |
| cg08817120 | DKFZP686A01247 | 22998  | TRUE  | 0.65(0.47-0.88) | 0.006 | 0.04 | 0  |
| cg26847866 | SCARA3         | 51435  | FALSE | 1.54(1.14-2.07) | 0.006 | 0.04 | 0  |
| cg06667406 | AASS           | 10157  | FALSE | 0.64(0.47-0.88) | 0.006 | 0.04 | 0  |
| cg16019273 | EIF2C4         | 192670 | TRUE  | 0.64(0.46-0.88) | 0.006 | 0.04 | 0  |
| cg07753644 | P2RY11         | 5032   | FALSE | 0.65(0.47-0.89) | 0.006 | 0.04 | 0  |
| cg10198932 | C21orf129      | 150135 | FALSE | 1.53(1.13-2.06) | 0.006 | 0.04 | 0  |
| cg05764376 | THAP10         | 56906  | TRUE  | 0.53(0.34-0.83) | 0.006 | 0.04 | 0  |
| cg04640886 | C19orf30       | 284424 | TRUE  | 0.63(0.45-0.87) | 0.006 | 0.04 | 0  |
| cg20537629 | MAGI2          | 9863   | TRUE  | 0.63(0.45-0.88) | 0.006 | 0.04 | 0  |
| cg19688503 | CAPN6          | 827    | FALSE | 1.56(1.14-2.14) | 0.006 | 0.04 | 0  |
| cg04999691 | C7orf29        | 113763 | FALSE | 0.65(0.48-0.88) | 0.006 | 0.04 | 0  |
| cg14701962 | C1orf111       | 284680 | FALSE | 1.52(1.12-2.06) | 0.006 | 0.04 | 0  |
| cg05341878 | RIMS2          | 9699   | FALSE | 1.67(1.16-2.42) | 0.006 | 0.04 | 0  |
| cg22892904 | CBX2           | 84733  | TRUE  | 0.64(0.46-0.89) | 0.006 | 0.04 | -1 |
| cg12526025 | LARGE          | 9215   | TRUE  | 0.66(0.49-0.89) | 0.006 | 0.04 | 0  |
| cg16521836 | KIAA1407       | 57577  | TRUE  | 1.49(1.12-1.98) | 0.006 | 0.04 | 0  |
| cg25827666 | NTRK1          | 4914   | FALSE | 1.56(1.13-2.16) | 0.006 | 0.04 | 0  |
| cg25372195 | DCD            | 117159 | FALSE | 1.54(1.13-2.1)  | 0.006 | 0.04 | 0  |
| cg09354331 | RAI17          | 57178  | FALSE | 1.58(1.14-2.19) | 0.006 | 0.04 | 0  |
| cg25126052 | INT4           | 92105  | TRUE  | 1.51(1.12-2.05) | 0.006 | 0.04 | 0  |
| cg00657095 | PPARD          | 5467   | TRUE  | 1.5(1.12-2)     | 0.006 | 0.04 | 0  |
| cg07846167 | FBLM1          | 54751  | TRUE  | 0.64(0.47-0.88) | 0.006 | 0.04 | 0  |
| cg02699167 | FBXL2          | 25827  | TRUE  | 0.61(0.43-0.86) | 0.006 | 0.04 | 0  |
| cg14046365 | NMI            | 9111   | TRUE  | 1.81(1.19-2.75) | 0.006 | 0.04 | 0  |
| cg08820801 | FBXO17         | 115290 | TRUE  | 0.66(0.49-0.89) | 0.006 | 0.04 | 0  |
| cg17563769 | GTF2A2         | 2958   | TRUE  | 1.7(1.16-2.5)   | 0.006 | 0.04 | 0  |

SuppTable2.txt

|            |          |        |       |                 |       |      |    |
|------------|----------|--------|-------|-----------------|-------|------|----|
| cg22908581 | CD4      | 920    | FALSE | 1.53(1.13-2.07) | 0.006 | 0.04 | 0  |
| cg02175308 | SORT1    | 6272   | TRUE  | 0.64(0.46-0.88) | 0.006 | 0.04 | 0  |
| cg23843812 | FLJ43582 | 389649 | FALSE | 0.63(0.45-0.88) | 0.006 | 0.04 | 0  |
| cg25076881 | OR10J1   | 26476  | FALSE | 1.53(1.12-2.08) | 0.006 | 0.04 | 0  |
| cg17003970 | CHFR     | 55743  | TRUE  | 0.68(0.51-0.89) | 0.006 | 0.04 | 0  |
| cg18742893 | BOC      | 91653  | TRUE  | 0.65(0.47-0.88) | 0.006 | 0.04 | 0  |
| cg19949550 | ASB2     | 51676  | FALSE | 1.55(1.12-2.13) | 0.006 | 0.04 | 0  |
| cg16293656 | FGF17    | 8822   | FALSE | 0.63(0.45-0.88) | 0.006 | 0.04 | 0  |
| cg27592112 | GABRG3   | 2567   | FALSE | 0.67(0.5-0.9)   | 0.006 | 0.04 | 0  |
| cg06874144 | CAB39    | 51719  | TRUE  | 0.66(0.48-0.89) | 0.006 | 0.04 | 0  |
| cg03399971 | INHBC    | 3626   | FALSE | 0.67(0.5-0.9)   | 0.006 | 0.04 | 0  |
| cg01361446 | IL2RG    | 3561   | FALSE | 1.49(1.11-2)    | 0.006 | 0.04 | 0  |
| cg05556210 | ATBF1    | 463    | TRUE  | 0.66(0.48-0.89) | 0.006 | 0.04 | 0  |
| cg18470891 | FOXM1    | 2305   | TRUE  | 0.66(0.48-0.89) | 0.006 | 0.04 | -1 |
| cg26132665 | C6orf165 | 154313 | TRUE  | 1.56(1.12-2.16) | 0.006 | 0.04 | 0  |
| cg23213217 | DEGS1    | 8560   | TRUE  | 1.54(1.12-2.11) | 0.006 | 0.04 | 0  |
| cg17687282 | A4GNT    | 51146  | FALSE | 1.67(1.17-2.38) | 0.007 | 0.04 | 0  |
| cg21964481 | SLC34A3  | 142680 | FALSE | 1.54(1.13-2.1)  | 0.007 | 0.04 | 0  |
| cg04544498 | MAGEE1   | 57692  | FALSE | 1.52(1.13-2.04) | 0.007 | 0.04 | 0  |
| cg06905862 | TPP1     | 1200   | FALSE | 1.52(1.12-2.06) | 0.007 | 0.04 | 0  |
| cg01227519 | SPANXD   | 64648  | FALSE | 0.66(0.49-0.88) | 0.007 | 0.04 | 0  |
| cg24428913 | WAS      | 7454   | FALSE | 0.66(0.49-0.9)  | 0.007 | 0.04 | 0  |
| cg20843052 | KIAA1841 | 84542  | TRUE  | 0.66(0.48-0.89) | 0.007 | 0.04 | 0  |
| cg18292394 | MAT1A    | 4143   | FALSE | 1.5(1.12-2)     | 0.007 | 0.04 | 0  |
| cg08812504 | QSCN6    | 5768   | TRUE  | 1.58(1.14-2.2)  | 0.007 | 0.04 | 0  |
| cg21902544 | CBLN2    | 147381 | TRUE  | 0.66(0.48-0.89) | 0.007 | 0.04 | 0  |
| cg19776453 | CEACAM1  | 634    | FALSE | 0.66(0.49-0.89) | 0.007 | 0.04 | 0  |

SuppTable2.txt

|            |          |        |       |                 |       |      |   |
|------------|----------|--------|-------|-----------------|-------|------|---|
| cg20870362 | CCIN     | 881    | FALSE | 0.65(0.47-0.89) | 0.007 | 0.04 | 0 |
| cg17558126 | RASSF5   | 83593  | TRUE  | 0.63(0.45-0.88) | 0.007 | 0.04 | 0 |
| cg25423111 | TSSK4    | 283629 | FALSE | 0.65(0.47-0.89) | 0.007 | 0.04 | 0 |
| cg04886198 | ALG3     | 10195  | TRUE  | 1.54(1.12-2.12) | 0.007 | 0.04 | 0 |
| cg03842617 | NOS3     | 4846   | FALSE | 1.66(1.15-2.4)  | 0.007 | 0.04 | 0 |
| cg04749372 | INMT     | 11185  | FALSE | 1.59(1.14-2.23) | 0.007 | 0.04 | 0 |
| cg10984852 | ECHS1    | 1892   | TRUE  | 1.53(1.12-2.1)  | 0.007 | 0.04 | 0 |
| cg24428042 | ECHDC3   | 79746  | TRUE  | 0.63(0.45-0.88) | 0.007 | 0.04 | 0 |
| cg21200380 | C1QBP    | 708    | TRUE  | 1.54(1.13-2.11) | 0.007 | 0.04 | 0 |
| cg09752703 | BCL2     | 596    | TRUE  | 1.66(1.15-2.38) | 0.007 | 0.04 | 0 |
| cg09819033 | CREBL2   | 1389   | TRUE  | 1.49(1.12-2)    | 0.007 | 0.04 | 0 |
| cg15916061 | SLC17A4  | 10050  | FALSE | 1.54(1.12-2.12) | 0.007 | 0.04 | 0 |
| cg26160573 | PTPN18   | 26489  | TRUE  | 0.67(0.51-0.9)  | 0.007 | 0.04 | 0 |
| cg04510262 | PTPN2    | 5771   | TRUE  | 1.57(1.13-2.18) | 0.007 | 0.04 | 0 |
| cg02868338 | EXOSC4   | 54512  | TRUE  | 0.65(0.47-0.89) | 0.007 | 0.04 | 0 |
| cg03498559 | UGT2B4   | 7363   | FALSE | 0.63(0.45-0.89) | 0.007 | 0.04 | 0 |
| cg19703826 | ZNF213   | 7760   | TRUE  | 1.54(1.13-2.11) | 0.007 | 0.04 | 0 |
| cg13372488 | KCNT2    | 343450 | FALSE | 1.62(1.14-2.3)  | 0.007 | 0.04 | 0 |
| cg23022999 | FLJ45909 | 126432 | FALSE | 1.61(1.14-2.29) | 0.007 | 0.04 | 0 |
| cg10909324 | EHMT2    | 10919  | TRUE  | 1.55(1.13-2.13) | 0.007 | 0.04 | 0 |
| cg21302727 | TACC2    | 10579  | FALSE | 0.61(0.43-0.87) | 0.007 | 0.04 | 0 |
| cg20425293 | MIRPL42  | 28977  | TRUE  | 1.54(1.13-2.11) | 0.007 | 0.04 | 0 |
| cg21053323 | SUMO3    | 6612   | TRUE  | 0.66(0.49-0.88) | 0.007 | 0.04 | 0 |
| cg20950277 | TNIP3    | 79931  | FALSE | 0.63(0.44-0.89) | 0.007 | 0.04 | 0 |
| cg04544154 | ELF4     | 2000   | TRUE  | 0.64(0.47-0.89) | 0.007 | 0.04 | 0 |
| cg25483839 | RAD23B   | 5887   | TRUE  | 1.56(1.14-2.13) | 0.007 | 0.04 | 0 |
| cg21553596 | FAM3B    | 54097  | TRUE  | 0.64(0.47-0.87) | 0.007 | 0.04 | 0 |

SuppTable2.txt

|            |            |        |       |                 |       |      |    |
|------------|------------|--------|-------|-----------------|-------|------|----|
| cg02398725 | ZF         | 58487  | TRUE  | 1.57(1.13-2.17) | 0.007 | 0.04 | 0  |
| cg22658979 | MM/P13     | 4322   | FALSE | 0.65(0.47-0.88) | 0.007 | 0.04 | 0  |
| cg02719634 | SLC22A18AS | 5003   | FALSE | 0.64(0.47-0.87) | 0.007 | 0.04 | 0  |
| cg03076871 | STX16      | 8675   | TRUE  | 1.52(1.12-2.06) | 0.007 | 0.04 | 0  |
| cg22464423 | IGSF4C     | 199731 | TRUE  | 1.51(1.11-2.03) | 0.007 | 0.04 | 0  |
| cg25608041 | TBC1D1     | 23216  | TRUE  | 0.65(0.47-0.89) | 0.007 | 0.04 | 0  |
| cg20787196 | ITPR2      | 3709   | TRUE  | 0.61(0.43-0.86) | 0.007 | 0.04 | 0  |
| cg23517677 | POLR2G     | 5436   | FALSE | 0.59(0.4-0.86)  | 0.007 | 0.04 | 0  |
| cg06043190 | EML4       | 27436  | TRUE  | 1.62(1.13-2.3)  | 0.007 | 0.04 | 0  |
| cg25926679 | ZNF512     | 84450  | TRUE  | 1.52(1.12-2.07) | 0.007 | 0.04 | 0  |
| cg18589858 | SLCO2B1    | 11309  | FALSE | 0.63(0.44-0.88) | 0.007 | 0.04 | 0  |
| cg00893987 | RPL7L1     | 285855 | TRUE  | 1.58(1.13-2.21) | 0.007 | 0.04 | 0  |
| cg15645309 | BATF       | 10538  | FALSE | 1.54(1.12-2.13) | 0.007 | 0.04 | 0  |
| cg19393006 | TSC1       | 7248   | FALSE | 1.5(1.11-2.03)  | 0.007 | 0.04 | 0  |
| cg04514981 | C18orf37   | 125476 | TRUE  | 1.53(1.12-2.1)  | 0.007 | 0.04 | 0  |
| cg23509869 | LST1       | 7940   | FALSE | 1.54(1.12-2.13) | 0.007 | 0.04 | 0  |
| cg20769102 | POLR2K     | 5440   | TRUE  | 1.55(1.12-2.15) | 0.007 | 0.04 | 0  |
| cg17179881 | BIK        | 638    | TRUE  | 1.55(1.12-2.15) | 0.007 | 0.04 | 0  |
| cg16606638 | GALNT4     | 8693   | TRUE  | 0.66(0.49-0.9)  | 0.007 | 0.04 | 0  |
| cg22340747 | GATM       | 2628   | FALSE | 0.66(0.49-0.89) | 0.007 | 0.04 | 0  |
| cg25165199 | RCBTB2     | 1102   | FALSE | 0.68(0.51-0.91) | 0.007 | 0.04 | -1 |
| cg06456031 | FLJ11000   | 55281  | FALSE | 1.62(1.13-2.31) | 0.007 | 0.04 | 0  |
| cg13149307 | PLXDC2     | 84898  | TRUE  | 0.64(0.46-0.89) | 0.007 | 0.04 | 0  |
| cg08693206 | AP1B1      | 162    | TRUE  | 1.5(1.12-2.03)  | 0.007 | 0.04 | 0  |
| cg20985014 | WISP3      | 8838   | FALSE | 1.56(1.13-2.17) | 0.007 | 0.04 | 0  |
| cg22730042 | U2AF1      | 7307   | TRUE  | 0.62(0.44-0.87) | 0.007 | 0.04 | 0  |
| cg21561142 | DEK        | 7913   | TRUE  | 1.52(1.12-2.06) | 0.007 | 0.04 | 0  |

SuppTable2.txt

|            |          |        |       |                 |       |      |   |
|------------|----------|--------|-------|-----------------|-------|------|---|
| cg20950011 | CIDEA    | 1149   | TRUE  | 0.66(0.49-0.89) | 0.007 | 0.04 | 0 |
| cg07799947 | NPAS2    | 4862   | TRUE  | 1.56(1.13-2.16) | 0.007 | 0.04 | 0 |
| cg17001430 | KIF25    | 3834   | FALSE | 1.66(1.14-2.41) | 0.007 | 0.04 | 0 |
| cg23877831 | MRPL51   | 51258  | TRUE  | 1.55(1.13-2.12) | 0.007 | 0.04 | 0 |
| cg07551659 | CGNL1    | 84952  | TRUE  | 0.65(0.48-0.89) | 0.007 | 0.04 | 0 |
| cg15305343 | NSUN4    | 387338 | TRUE  | 1.48(1.12-1.97) | 0.007 | 0.04 | 0 |
| cg07034561 | TSGA2    | 89765  | TRUE  | 1.53(1.13-2.06) | 0.007 | 0.04 | 0 |
| cg07595113 | MYBL1    | 4603   | TRUE  | 1.57(1.13-2.17) | 0.007 | 0.04 | 0 |
| cg13993218 | INS      | 3630   | FALSE | 1.59(1.15-2.2)  | 0.007 | 0.04 | 0 |
| cg11846956 | KLK10    | 5655   | TRUE  | 0.61(0.43-0.87) | 0.007 | 0.04 | 0 |
| cg03135127 | TRMT1    | 55621  | TRUE  | 1.52(1.11-2.07) | 0.007 | 0.04 | 0 |
| cg02804166 | PHF6     | 84295  | TRUE  | 1.51(1.12-2.05) | 0.007 | 0.04 | 0 |
| cg11835197 | TFAP2E   | 339488 | TRUE  | 0.64(0.46-0.89) | 0.007 | 0.04 | 0 |
| cg05418129 | C9orf26  | 90865  | FALSE | 0.63(0.45-0.89) | 0.007 | 0.04 | 0 |
| cg14520511 | KRIT1    | 889    | TRUE  | 1.59(1.13-2.23) | 0.007 | 0.04 | 0 |
| cg02204046 | MYCN     | 4613   | TRUE  | 0.66(0.49-0.89) | 0.007 | 0.04 | 0 |
| cg21233722 | DOCK2    | 1794   | TRUE  | 1.66(1.15-2.39) | 0.007 | 0.04 | 0 |
| cg02962602 | CCDC57   | 284001 | TRUE  | 1.49(1.11-2)    | 0.007 | 0.05 | 0 |
| cg17571291 | BLVRA    | 644    | TRUE  | 0.67(0.51-0.9)  | 0.007 | 0.05 | 0 |
| cg01871963 | LCN2     | 3934   | FALSE | 1.56(1.13-2.15) | 0.007 | 0.05 | 0 |
| cg18239753 | KHDRBS2  | 202559 | TRUE  | 0.66(0.49-0.89) | 0.007 | 0.05 | 0 |
| cg01683883 | CMTM2    | 146225 | TRUE  | 0.59(0.41-0.87) | 0.007 | 0.05 | 0 |
| cg07778029 | HOXA9    | 3205   | TRUE  | 0.67(0.5-0.9)   | 0.007 | 0.05 | 0 |
| cg05215575 | FLJ25410 | 124404 | FALSE | 1.49(1.11-1.99) | 0.007 | 0.05 | 0 |
| cg15600835 | raptor   | 57521  | TRUE  | 1.52(1.11-2.08) | 0.007 | 0.05 | 0 |
| cg24889744 | C20orf28 | 25876  | TRUE  | 0.63(0.45-0.89) | 0.007 | 0.05 | 0 |
| cg02564061 | C12orf25 | 84070  | FALSE | 0.66(0.49-0.9)  | 0.007 | 0.05 | 0 |

SupplTable2.txt

|            |           |        |       |                 |       |      |    |
|------------|-----------|--------|-------|-----------------|-------|------|----|
| cg03562120 | WISP2     | 8839   | TRUE  | 0.63(0.45-0.88) | 0.007 | 0.05 | 0  |
| cg17022479 | FAF1      | 11124  | TRUE  | 1.58(1.13-2.22) | 0.007 | 0.05 | 0  |
| cg19279346 | LILRB2    | 10288  | FALSE | 0.67(0.5-0.9)   | 0.007 | 0.05 | 0  |
| cg15051063 |           | 5088   | FALSE | 1.5(1.11-2.02)  | 0.007 | 0.05 | 0  |
| cg22621695 | DYRK2     | 8445   | TRUE  | 1.69(1.15-2.48) | 0.007 | 0.05 | 0  |
| cg18047970 | GADL1     | 339896 | FALSE | 0.66(0.48-0.9)  | 0.007 | 0.05 | 0  |
| cg21256649 | PRKAR1A   | 5573   | FALSE | 0.66(0.49-0.9)  | 0.007 | 0.05 | -1 |
| cg11094938 | ATP2A1    | 487    | FALSE | 1.54(1.12-2.12) | 0.007 | 0.05 | 0  |
| cg22122449 | ACR       | 49     | FALSE | 1.65(1.16-2.35) | 0.007 | 0.05 | 0  |
| cg08983259 | INSL5     | 10022  | TRUE  | 0.62(0.44-0.89) | 0.007 | 0.05 | 0  |
| cg08737421 | MAX       | 4149   | TRUE  | 1.5(1.11-2.02)  | 0.007 | 0.05 | 0  |
| cg12497564 | RBP1      | 5947   | TRUE  | 0.62(0.44-0.87) | 0.007 | 0.05 | 0  |
| cg08965235 | LTBP3     | 4054   | TRUE  | 0.67(0.5-0.89)  | 0.007 | 0.05 | 0  |
| cg14568338 | IGF1R     | 3480   | TRUE  | 1.57(1.12-2.2)  | 0.007 | 0.05 | 0  |
| cg26521448 | ZC3H7A    | 29066  | TRUE  | 1.61(1.13-2.3)  | 0.007 | 0.05 | 0  |
| cg03117949 | USP16     | 10600  | TRUE  | 1.54(1.12-2.12) | 0.007 | 0.05 | 0  |
| cg11308840 | LOC401498 | 401498 | TRUE  | 0.63(0.46-0.88) | 0.007 | 0.05 | 0  |
| cg03620376 | CDC42EP5  | 148170 | FALSE | 0.64(0.46-0.89) | 0.007 | 0.05 | 0  |
| cg14587868 | TGM1      | 7051   | FALSE | 1.54(1.12-2.11) | 0.007 | 0.05 | 0  |
| cg14727512 | TSSK2     | 23617  | TRUE  | 0.64(0.46-0.89) | 0.007 | 0.05 | 0  |
| cg10417559 | LMO6      | 4007   | FALSE | 0.62(0.45-0.87) | 0.007 | 0.05 | 0  |
| cg16812893 | KRTAP15-1 | 254950 | FALSE | 1.55(1.12-2.16) | 0.007 | 0.05 | 0  |
| cg24724583 | PLXDC1    | 57125  | FALSE | 0.68(0.51-0.9)  | 0.007 | 0.05 | 0  |
| cg27037648 | CASKIN2   | 57513  | TRUE  | 0.65(0.47-0.89) | 0.007 | 0.05 | 0  |
| cg00729875 | PALMD     | 54873  | FALSE | 1.5(1.11-2.02)  | 0.007 | 0.05 | 0  |
| cg23867494 | TNFRSF4   | 7293   | FALSE | 1.49(1.11-2)    | 0.007 | 0.05 | 0  |
| cg26608032 | MKL1      | 57591  | TRUE  | 1.52(1.14-2.05) | 0.007 | 0.05 | 0  |

## SupplTable2.txt

|            |          |        |       |                 |       |      |   |
|------------|----------|--------|-------|-----------------|-------|------|---|
| cg03473518 | GJB6     | 10804  | TRUE  | 0.63(0.45-0.88) | 0.007 | 0.05 | 0 |
| cg07341907 | UNC13B   | 10497  | TRUE  | 1.61(1.13-2.28) | 0.007 | 0.05 | 0 |
| cg13784792 | JUP      | 3728   | TRUE  | 0.66(0.48-0.9)  | 0.007 | 0.05 | 0 |
| cg03148461 | BRAF     | 673    | TRUE  | 1.52(1.11-2.07) | 0.008 | 0.05 | 0 |
| cg13599007 | FABP6    | 2172   | FALSE | 0.59(0.4-0.86)  | 0.008 | 0.05 | 0 |
| cg26711820 | MYF6     | 4618   | TRUE  | 1.53(1.11-2.11) | 0.008 | 0.05 | 0 |
| cg02990612 | GATA4    | 2626   | TRUE  | 1.51(1.11-2.06) | 0.008 | 0.05 | 0 |
| cg04432009 | LYL1     | 4066   | TRUE  | 1.52(1.12-2.06) | 0.008 | 0.05 | 0 |
| cg07246225 | ZFX1B    | 9839   | TRUE  | 1.61(1.14-2.29) | 0.008 | 0.05 | 0 |
| cg23540745 | HIST1H4G | 8369   | TRUE  | 0.58(0.39-0.87) | 0.008 | 0.05 | 0 |
| cg22752533 | SLC12A5  | 57468  | TRUE  | 0.66(0.49-0.89) | 0.008 | 0.05 | 0 |
| cg10065130 | COG5     | 10466  | TRUE  | 1.47(1.11-1.96) | 0.008 | 0.05 | 0 |
| cg25374813 | SLC23A1  | 9963   | FALSE | 0.67(0.5-0.9)   | 0.008 | 0.05 | 0 |
| cg02246665 | HCF2     | 29915  | TRUE  | 1.54(1.12-2.11) | 0.008 | 0.05 | 0 |
| cg24987706 | GPA33    | 10223  | FALSE | 0.63(0.44-0.89) | 0.008 | 0.05 | 0 |
| cg04675937 | CDKN2B   | 1030   | TRUE  | 0.64(0.46-0.88) | 0.008 | 0.05 | 0 |
| cg20376899 | EDN1     | 1906   | TRUE  | 1.52(1.12-2.08) | 0.008 | 0.05 | 0 |
| cg03388193 | HPSE2    | 60495  | TRUE  | 1.55(1.12-2.14) | 0.008 | 0.05 | 0 |
| cg10124491 | MGC29891 | 126626 | TRUE  | 1.91(1.19-3.08) | 0.008 | 0.05 | 0 |
| cg24642820 | NUP210   | 23225  | TRUE  | 1.47(1.1-1.97)  | 0.008 | 0.05 | 0 |
| cg16666160 | NR5A1    | 2516   | TRUE  | 1.55(1.13-2.13) | 0.008 | 0.05 | 0 |
| cg00060882 | EIF2S3   | 1968   | TRUE  | 1.51(1.11-2.06) | 0.008 | 0.05 | 0 |
| cg20663831 | GIMAP2   | 26157  | FALSE | 1.68(1.13-2.48) | 0.008 | 0.05 | 0 |
| cg06493386 | TRPA1    | 8989   | TRUE  | 0.62(0.44-0.88) | 0.008 | 0.05 | 0 |
| cg17524624 | GSTK1    | 373156 | TRUE  | 1.51(1.11-2.05) | 0.008 | 0.05 | 0 |
| cg22717127 | CBWD2    | 150472 | TRUE  | 0.62(0.44-0.87) | 0.008 | 0.05 | 0 |
| cg25194415 | KIAA0232 | 9778   | TRUE  | 1.62(1.13-2.33) | 0.008 | 0.05 | 0 |

## SuppTable2.txt

|            |              |        |       |                 |       |      |   |
|------------|--------------|--------|-------|-----------------|-------|------|---|
| cg21407055 | ART1         | 417    | FALSE | 1.58(1.13-2.22) | 0.008 | 0.05 | 0 |
| cg22792432 | ROCK1        | 6093   | TRUE  | 1.52(1.12-2.06) | 0.008 | 0.05 | 0 |
| cg26145103 | MGC17839     | 219902 | TRUE  | 0.63(0.44-0.89) | 0.008 | 0.05 | 0 |
| cg09352789 | XPNIPEP1     | 7511   | TRUE  | 1.53(1.13-2.07) | 0.008 | 0.05 | 0 |
| cg15272684 | KIAA0319L    | 79932  | FALSE | 0.63(0.44-0.88) | 0.008 | 0.05 | 0 |
| cg06214007 | GBP6         | 163351 | FALSE | 1.51(1.11-2.05) | 0.008 | 0.05 | 0 |
| cg24895052 | MPP3         | 4356   | FALSE | 0.63(0.45-0.88) | 0.008 | 0.05 | 0 |
| cg16872560 | PPP1R9A      | 55607  | TRUE  | 0.65(0.47-0.89) | 0.008 | 0.05 | 0 |
| cg16842214 | KBTD5        | 131377 | TRUE  | 1.48(1.1-1.98)  | 0.008 | 0.05 | 0 |
| cg13160888 | NIPSNAP3B    | 55335  | TRUE  | 1.49(1.1-2.01)  | 0.008 | 0.05 | 0 |
| cg19734228 | DAPK1        | 1612   | TRUE  | 0.62(0.45-0.88) | 0.008 | 0.05 | 0 |
| cg21665774 | KIAA0355     | 9710   | FALSE | 0.66(0.48-0.9)  | 0.008 | 0.05 | 0 |
| cg26845278 | SPATA21      | 374955 | FALSE | 1.52(1.11-2.08) | 0.008 | 0.05 | 0 |
| cg25475443 | GALNAC4S-6ST | 51363  | FALSE | 1.55(1.12-2.15) | 0.008 | 0.05 | 0 |
| cg11492403 | AARSD1       | 80765  | TRUE  | 0.64(0.46-0.89) | 0.008 | 0.05 | 0 |
| cg03417317 | C10orf77     | 79847  | TRUE  | 1.64(1.13-2.38) | 0.008 | 0.05 | 0 |
| cg02367951 | HIST1H2AK    | 8330   | TRUE  | 1.53(1.12-2.09) | 0.008 | 0.05 | 0 |
| cg23978557 | SMIPD2       | 6610   | TRUE  | 0.52(0.33-0.83) | 0.008 | 0.05 | 0 |
| cg02309273 | INPP5B       | 3633   | FALSE | 0.65(0.47-0.9)  | 0.008 | 0.05 | 0 |
| cg20668607 | DNAJC11      | 55735  | TRUE  | 0.67(0.5-0.9)   | 0.008 | 0.05 | 0 |
| cg01255349 | PFIBP1       | 8496   | TRUE  | 1.73(1.16-2.58) | 0.008 | 0.05 | 0 |
| cg00030047 | C1orf188     | 148646 | TRUE  | 0.66(0.49-0.9)  | 0.008 | 0.05 | 0 |
| cg19481686 | CDKN2B       | 1030   | TRUE  | 0.67(0.49-0.9)  | 0.008 | 0.05 | 0 |
| cg01566170 | CAPN2        | 824    | TRUE  | 1.49(1.11-2.01) | 0.008 | 0.05 | 0 |
| cg04968473 | CYP1A2       | 1544   | FALSE | 1.56(1.12-2.15) | 0.008 | 0.05 | 0 |
| cg18440048 | ZNF70        | 7621   | TRUE  | 0.66(0.48-0.9)  | 0.008 | 0.05 | 0 |
| cg23182299 | LHX5         | 64211  | TRUE  | 0.64(0.46-0.89) | 0.008 | 0.05 | 0 |

SuppTable2.txt

|            |          |        |       |                 |       |      |    |
|------------|----------|--------|-------|-----------------|-------|------|----|
| cg17644208 | ADCY3    | 109    | TRUE  | 1.52(1.12-2.08) | 0.008 | 0.05 | 0  |
| cg15712267 | DNAJB1   | 3337   | TRUE  | 0.67(0.5-0.9)   | 0.008 | 0.05 | 0  |
| cg05475904 | BCL10    | 8915   | FALSE | 0.67(0.5-0.9)   | 0.008 | 0.05 | 0  |
| cg26709950 | RRAD     | 6236   | TRUE  | 1.59(1.12-2.25) | 0.008 | 0.05 | 0  |
| cg13017345 | MXI1     | 4601   | TRUE  | 0.68(0.5-0.91)  | 0.008 | 0.05 | 0  |
| cg01939428 | UBE3C    | 9690   | TRUE  | 1.48(1.11-1.98) | 0.008 | 0.05 | 0  |
| cg10773309 | BAI2     | 576    | TRUE  | 1.56(1.12-2.16) | 0.008 | 0.05 | 0  |
| cg18670235 | PLOD3    | 8985   | TRUE  | 0.68(0.51-0.91) | 0.008 | 0.05 | 0  |
| cg13199589 | FAM80A   | 284716 | TRUE  | 0.66(0.48-0.9)  | 0.008 | 0.05 | 0  |
| cg25565479 | PANX1    | 24145  | TRUE  | 1.54(1.12-2.11) | 0.008 | 0.05 | 0  |
| cg16620731 | ZNF583   | 147949 | TRUE  | 2.24(1.24-4.05) | 0.008 | 0.05 | 0  |
| cg03754063 | KEAP1    | 9817   | TRUE  | 0.64(0.46-0.89) | 0.008 | 0.05 | 0  |
| cg05871136 | UNC5B    | 219699 | TRUE  | 0.64(0.46-0.9)  | 0.008 | 0.05 | 0  |
| cg11935147 | PDE4DIP  | 9659   | TRUE  | 0.65(0.48-0.88) | 0.008 | 0.05 | 0  |
| cg19949137 | HTATSF1  | 27336  | TRUE  | 1.65(1.14-2.38) | 0.008 | 0.05 | 0  |
| cg09411366 | PEPD     | 5184   | FALSE | 1.48(1.11-1.98) | 0.008 | 0.05 | 0  |
| cg02774160 | GGT1     | 2678   | FALSE | 0.63(0.45-0.89) | 0.008 | 0.05 | 0  |
| cg21246431 | MGC40579 | 256356 | TRUE  | 1.47(1.1-1.95)  | 0.008 | 0.05 | 0  |
| cg17280624 | PGRMC2   | 10424  | TRUE  | 1.53(1.11-2.11) | 0.008 | 0.05 | 0  |
| cg27440834 | SNX4     | 8723   | FALSE | 0.68(0.51-0.91) | 0.008 | 0.05 | -1 |
| cg20017147 | TEX101   | 83639  | FALSE | 0.67(0.49-0.9)  | 0.008 | 0.05 | 0  |
| cg23037403 | ZNF454   | 285676 | TRUE  | 0.64(0.47-0.89) | 0.008 | 0.05 | 0  |
| cg06226384 | CACNG5   | 27091  | FALSE | 1.52(1.12-2.06) | 0.008 | 0.05 | 0  |
| cg07549194 | TIP39    | 113091 | FALSE | 1.49(1.1-2)     | 0.008 | 0.05 | 0  |
| cg03837750 | LRRCC44  | 127255 | TRUE  | 1.58(1.12-2.23) | 0.008 | 0.05 | 0  |
| cg04725234 | TMEM38B  | 55151  | TRUE  | 0.65(0.47-0.9)  | 0.008 | 0.05 | 0  |
| cg05181279 | RIG      | 10530  | FALSE | 1.51(1.1-2.07)  | 0.008 | 0.05 | 0  |

SuppTable2.txt

|            |           |        |       |                 |       |      |   |
|------------|-----------|--------|-------|-----------------|-------|------|---|
| cg07423906 | C17orf56  | 146705 | TRUE  | 0.66(0.47-0.9)  | 0.008 | 0.05 | 0 |
| cg09805010 | THRB      | 7068   | TRUE  | 0.65(0.48-0.89) | 0.008 | 0.05 | 0 |
| cg09450020 | STEAP2    | 261729 | TRUE  | 0.66(0.49-0.9)  | 0.008 | 0.05 | 0 |
| cg12506971 | AADAT     | 51166  | TRUE  | 0.61(0.42-0.87) | 0.008 | 0.05 | 0 |
| cg01427567 | TMC4      | 147798 | FALSE | 1.49(1.12-1.98) | 0.008 | 0.05 | 0 |
| cg26059153 | C20orf133 | 140733 | TRUE  | 0.61(0.42-0.87) | 0.008 | 0.05 | 0 |
| cg19982860 | IFNA21    | 3452   | FALSE | 1.54(1.12-2.11) | 0.008 | 0.05 | 0 |
| cg18027946 | C21orf2   | 755    | TRUE  | 1.56(1.12-2.16) | 0.008 | 0.05 | 0 |
| cg10904672 | FCGR1A    | 2209   | FALSE | 1.49(1.11-2.02) | 0.008 | 0.05 | 0 |
| cg01169778 | GBGT1     | 26301  | TRUE  | 0.67(0.49-0.9)  | 0.008 | 0.05 | 0 |
| cg15780361 | ALS2CR11  | 151254 | TRUE  | 0.69(0.52-0.91) | 0.008 | 0.05 | 0 |
| cg19988449 | BNC1      | 646    | TRUE  | 0.61(0.42-0.87) | 0.008 | 0.05 | 0 |
| cg22335340 | PTPN6     | 5777   | FALSE | 1.52(1.11-2.08) | 0.008 | 0.05 | 0 |
| cg14602164 | FBXO8     | 26269  | TRUE  | 1.51(1.11-2.06) | 0.008 | 0.05 | 0 |
| cg02523617 | HIP2      | 3093   | TRUE  | 1.61(1.12-2.28) | 0.008 | 0.05 | 0 |
