# Supplementary material for: An Epigenetic Signature in Peripheral Blood Predicts Active Ovarian Cancer
Source: PubMed Central journal article supplement (PMC2793425; doi:10.1371/journal.pone.0008274), 2009-12-18
Supplement: pone.0008274.s011.pdf [file pone.0008274.s011.pdf]

SuppTables

| lmmID      | Symbol   | Gene_ID | CPG_ISLAND | OR (95% CI)     | P-val  | Q-val | CA-diagnostic Cpg? |
|------------|----------|---------|------------|-----------------|--------|-------|--------------------|
| cg10986043 | TCAP     | 8557    | FALSE      | 4.36(2.55-7.43) | 7E-08  | 0.002 | NO                 |
| cg06653796 | LIME1    | 54923   | TRUE       | 3.39(2.06-5.58) | 2E-06  | 0.019 | YES                |
| cg19287277 | RKHD3    | 84206   | TRUE       | 0.09(0.03-0.28) | 4E-05  | 0.314 | NO                 |
| cg15096140 | MYO1B    | 4430    | TRUE       | 0.41(0.26-0.63) | 8E-05  | 0.361 | NO                 |
| cg11481351 | FNDG7    | 163479  | FALSE      | 0.43(0.29-0.66) | 0.0001 | 0.361 | NO                 |
| cg02679745 | FUTT7    | 2529    | FALSE      | 0.24(0.12-0.5)  | 0.0001 | 0.361 | YES                |
| cg01254505 | BST2     | 684     | FALSE      | 2.2(1.47-3.31)  | 0.0001 | 0.361 | NO                 |
| cg18105315 | MANEAL   | 149175  | TRUE       | 0.35(0.2-0.6)   | 0.0001 | 0.361 | NO                 |
| cg11471401 | KRT6A    | 3853    | FALSE      | 2.4(1.53-3.76)  | 0.0001 | 0.361 | NO                 |
| cg00973286 | TNFRSF1A | 7132    | FALSE      | 1.99(1.39-2.84) | 0.0002 | 0.361 | NO                 |
| cg05472874 | SULT4A1  | 25830   | TRUE       | 3.85(1.9-7.81)  | 0.0002 | 0.361 | NO                 |
| cg18676803 | MYNN     | 55892   | TRUE       | 0.45(0.29-0.68) | 0.0002 | 0.361 | NO                 |
| cg13379236 | EGF      | 1950    | FALSE      | 2.06(1.4-3.03)  | 0.0002 | 0.361 | NO                 |
| cg05135288 | RHOT2    | 89941   | FALSE      | 2.29(1.47-3.56) | 0.0002 | 0.361 | NO                 |
| cg07732037 | MPHOSPH9 | 10198   | FALSE      | 2.19(1.44-3.33) | 0.0002 | 0.361 | YES                |
| cg14520448 | PQBP1    | 10084   | TRUE       | 2.54(1.54-4.18) | 0.0002 | 0.361 | NO                 |
| cg04032871 | QPCTL    | 54814   | TRUE       | 1.99(1.37-2.9)  | 0.0003 | 0.37  | NO                 |
| cg10313633 | TP53I1   | 9537    | TRUE       | 0.48(0.33-0.72) | 0.0003 | 0.37  | NO                 |
| cg03547797 | GAS2     | 2620    | FALSE      | 2.05(1.39-3.04) | 0.0003 | 0.37  | NO                 |
| cg22189286 | HSPB8    | 26353   | FALSE      | 2.08(1.39-3.11) | 0.0004 | 0.37  | NO                 |
| cg21787291 | TCBA1    | 154215  | TRUE       | 0.15(0.05-0.43) | 0.0004 | 0.37  | NO                 |
| cg16046376 | PC       | 5091    | FALSE      | 3.09(1.66-5.76) | 0.0004 | 0.37  | YES                |
| cg12937807 | LPHN1    | 22859   | TRUE       | 2.39(1.47-3.87) | 0.0004 | 0.37  | NO                 |
| cg02245418 | ZNF364   | 27246   | FALSE      | 0.41(0.25-0.67) | 0.0004 | 0.37  | YES                |
| cg26431343 | HSPC117  | 51493   | FALSE      | 0.51(0.35-0.74) | 0.0004 | 0.37  | NO                 |
| cg05600717 | FLJ13639 | 79758   | TRUE       | 2.7(1.55-4.7)   | 0.0005 | 0.37  | NO                 |

SuppTables

|             |           |        |       |                 |        |       |     |
|-------------|-----------|--------|-------|-----------------|--------|-------|-----|
| cg119965810 | KCNH7     | 90134  | TRUE  | 3.04(1.63-5.66) | 0.0005 | 0.37  | NO  |
| cg10929387  | ITIH4     | 3700   | FALSE | 2.11(1.39-3.22) | 0.0005 | 0.37  | NO  |
| cg23995778  | CGB5      | 93659  | TRUE  | 0.49(0.32-0.73) | 0.0005 | 0.37  | NO  |
| cg10694152  | SLC15A1   | 6564   | TRUE  | 2.3(1.44-3.69)  | 0.0005 | 0.37  | NO  |
| cg11529128  | LHFPL5    | 222662 | TRUE  | 0.41(0.25-0.68) | 0.0005 | 0.37  | NO  |
| cg15279364  | TMEM130   | 222865 | TRUE  | 0.43(0.27-0.69) | 0.0005 | 0.37  | NO  |
| cg10467098  | Bles03    | 83638  | FALSE | 2.06(1.37-3.11) | 0.0005 | 0.37  | NO  |
| cg23303408  | POU4F3    | 5459   | TRUE  | 2.82(1.57-5.1)  | 0.0006 | 0.377 | NO  |
| cg16142218  | CHMP7     | 91782  | FALSE | 0.37(0.21-0.65) | 0.0006 | 0.377 | YES |
| cg19202384  | PYGR1     | 5831   | TRUE  | 0.46(0.3-0.72)  | 0.0006 | 0.377 | NO  |
| cg16890093  | PSMB8     | 5696   | FALSE | 0.42(0.25-0.69) | 0.0007 | 0.377 | NO  |
| cg07211259  | PDCD1LG2  | 80380  | FALSE | 1.89(1.31-2.73) | 0.0007 | 0.377 | NO  |
| cg18780401  | OTUD5     | 55593  | TRUE  | 2.66(1.51-4.69) | 0.0007 | 0.377 | NO  |
| cg05004940  | C20orf195 | 79025  | TRUE  | 1.86(1.3-2.68)  | 0.0007 | 0.377 | NO  |
| cg26718122  | SFRS6     | 6431   | TRUE  | 3.15(1.62-6.14) | 0.0007 | 0.377 | YES |
| cg18788940  | HTATIP2   | 10553  | TRUE  | 0.52(0.35-0.76) | 0.0008 | 0.377 | NO  |
| cg11799561  | SMR3A     | 26952  | FALSE | 0.43(0.26-0.7)  | 0.0008 | 0.377 | NO  |
| cg15690721  | ZNF85     | 7639   | FALSE | 0.46(0.29-0.73) | 0.0008 | 0.377 | NO  |
| cg18113270  | MMP3      | 4314   | FALSE | 0.54(0.38-0.77) | 0.0008 | 0.377 | NO  |
| cg26777475  | PCOLCE    | 5118   | FALSE | 2.27(1.41-3.66) | 0.0008 | 0.377 | NO  |
| cg25288155  | PLEKHB1   | 58473  | FALSE | 0.51(0.34-0.75) | 0.0008 | 0.377 | NO  |
| cg12243271  | CFI       | 3426   | FALSE | 0.41(0.25-0.69) | 0.0008 | 0.377 | YES |
| cg18056600  | ZMYND15   | 84225  | TRUE  | 0.46(0.29-0.72) | 0.0008 | 0.377 | NO  |
| cg26746469  | KIAA0406  | 9675   | FALSE | 0.3(0.15-0.61)  | 0.0008 | 0.377 | NO  |
| cg19714296  | CYP4A11   | 1579   | FALSE | 0.56(0.4-0.79)  | 0.0008 | 0.377 | NO  |
| cg18638581  | HK2       | 3099   | FALSE | 0.19(0.07-0.5)  | 0.0009 | 0.377 | YES |
| cg00406844  | RFPPL3    | 10738  | FALSE | 2.42(1.43-4.07) | 0.0009 | 0.377 | YES |

SuppTables

|            |          |        |       |                 |        |       |     |
|------------|----------|--------|-------|-----------------|--------|-------|-----|
| cg24082826 | ITPR2    | 3709   | TRUE  | 0.52(0.36-0.77) | 0.0009 | 0.377 | NO  |
| cg12400041 | DST      | 667    | TRUE  | 0.49(0.32-0.75) | 0.0009 | 0.377 | YES |
| cg12619509 | DNASE1L2 | 1775   | TRUE  | 2.33(1.41-3.84) | 0.0009 | 0.377 | NO  |
| cg25070480 | PPHLN1   | 51535  | TRUE  | 0.42(0.25-0.7)  | 0.001  | 0.377 | NO  |
| cg10881306 | CRIM1    | 51232  | TRUE  | 1.85(1.28-2.66) | 0.001  | 0.377 | NO  |
| cg19286986 | GPR162   | 27239  | TRUE  | 2.08(1.34-3.2)  | 0.001  | 0.377 | YES |
| cg07550362 | TAC1     | 6863   | TRUE  | 0.27(0.12-0.59) | 0.001  | 0.377 | NO  |
| cg20979799 | RFXDC1   | 222546 | TRUE  | 2.05(1.33-3.15) | 0.001  | 0.377 | NO  |
| cg15674997 | GRM6     | 2916   | TRUE  | 1.9(1.29-2.8)   | 0.001  | 0.377 | NO  |
| cg05679613 | MEPE     | 56955  | FALSE | 0.41(0.24-0.7)  | 0.001  | 0.377 | YES |
| cg11368509 | SUV420H2 | 84787  | TRUE  | 2.19(1.37-3.51) | 0.001  | 0.377 | NO  |
| cg24063382 | MAS1L    | 116511 | FALSE | 2.13(1.35-3.35) | 0.001  | 0.377 | YES |
| cg22475430 | ATN1     | 1822   | FALSE | 0.53(0.36-0.78) | 0.001  | 0.377 | NO  |
| cg18204685 | BTD      | 686    | FALSE | 0.44(0.27-0.72) | 0.001  | 0.377 | NO  |
| cg05380910 | STOML3   | 161003 | FALSE | 2.45(1.43-4.2)  | 0.001  | 0.377 | NO  |
| cg00108454 | C1QA     | 712    | FALSE | 0.53(0.37-0.78) | 0.001  | 0.377 | NO  |
| cg13906416 | PVR      | 5817   | TRUE  | 0.24(0.1-0.57)  | 0.001  | 0.377 | NO  |
| cg23698956 | FAM3A    | 60343  | TRUE  | 1.94(1.3-2.9)   | 0.001  | 0.377 | NO  |
| cg01078434 | MAS1L    | 116511 | FALSE | 2.51(1.44-4.38) | 0.001  | 0.377 | YES |
| cg24731756 | ILK      | 3611   | TRUE  | 1.76(1.25-2.47) | 0.001  | 0.377 | NO  |
| cg19573166 | SLC22A17 | 51310  | FALSE | 1.89(1.29-2.78) | 0.001  | 0.377 | NO  |
| cg02053171 | WBSCR16  | 81554  | TRUE  | 1.81(1.26-2.59) | 0.001  | 0.377 | YES |
| cg25410053 | ZIC3     | 7547   | TRUE  | 0.54(0.37-0.79) | 0.001  | 0.38  | NO  |
| cg21481775 | NKX3-1   | 4824   | TRUE  | 0.31(0.15-0.63) | 0.001  | 0.38  | NO  |
| cg05523047 | VLDLR    | 7436   | TRUE  | 0.22(0.09-0.55) | 0.001  | 0.38  | NO  |
| cg01137532 | ZNF365   | 22891  | TRUE  | 0.27(0.12-0.6)  | 0.001  | 0.38  | NO  |
| cg11911951 | C16orf28 | 65259  | TRUE  | 0.51(0.34-0.77) | 0.001  | 0.39  | NO  |

SuppTables

|            |         |       |       |                 |       |      |     |
|------------|---------|-------|-------|-----------------|-------|------|-----|
| cg11879514 | SLC16A6 | 9120  | TRUE  | 2.04(1.32-3.17) | 0.001 | 0.39 | YES |
| cg06059810 | RUFY3   | 22902 | FALSE | 0.46(0.29-0.74) | 0.001 | 0.39 | NO  |
| cg13383490 | TSG101  | 7251  | TRUE  | 2.48(1.42-4.33) | 0.001 | 0.39 | YES |
| cg08821669 | COX6A1  | 1337  | TRUE  | 2.36(1.39-4)    | 0.001 | 0.39 | NO  |
